# Supplementary material for: Mercury-induced epigenetic transgenerational inheritance of abnormal neurobehavior is correlated with sperm epimutations in zebrafish
Source: PubMed Central journal article supplement (PMC5413066; doi:10.1371/journal.pone.0176155), 2017-05-02
Supplement: pone.0176155.s002.pdf [file pone.0176155.s002.pdf]

Supplemental Figure S2

A. MeDIP pairwise internal population analysis summary F0 generation

Analysis

| Full Analysis | C1vsC2 | C1vsC3 | C2vsC3 | T1vsT2 | T1vsT3 | T2vsT3 |
|---------------|--------|--------|--------|--------|--------|--------|
| 291           | 724    | 423    | 541    | 403    | 338    | 349    |

The number of DMR found for each analysis. All DMR have at least two significant windows at a p-value threshold of 1e-07.

Overlapping DMR

The following figures show the number of overlapping DMR between each pairwise analysis and the full analysis

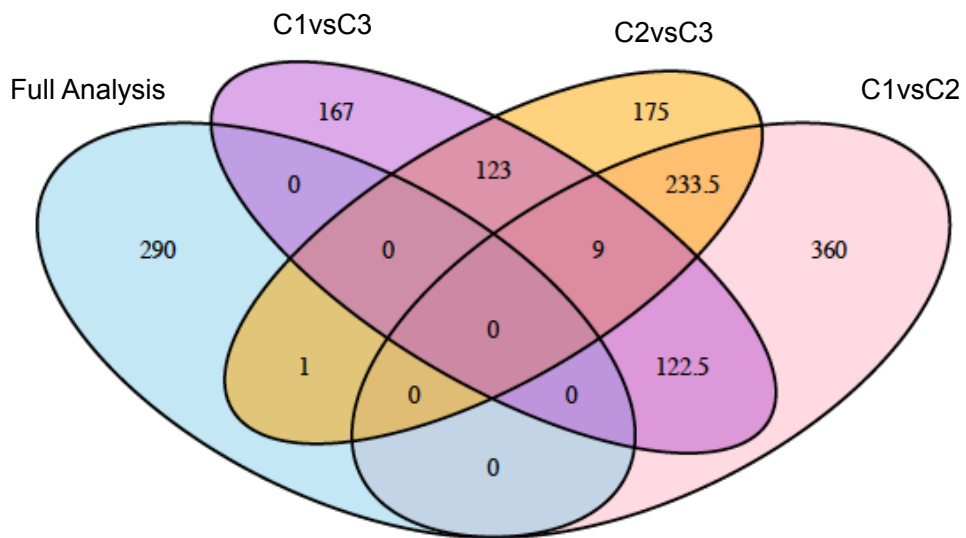

This figure shows the overlapping DMR between the control vs. control pairwise analyses and the full analysis.

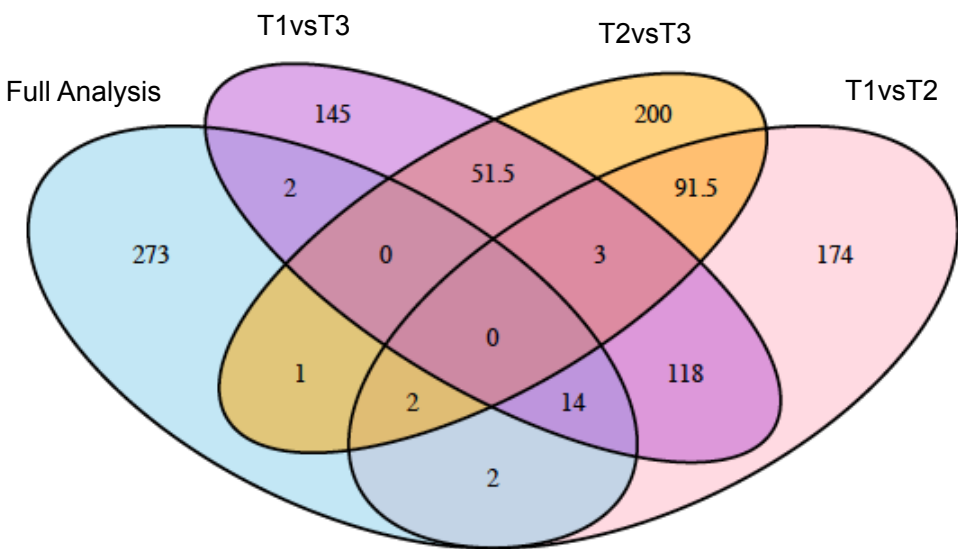

This figure shows the overlapping DMR between the treatment vs. treatment pairwise analyses and the full analysis.

B. MeDIP pairwise internal population analysis summary F2 generation

Analysis

| Full Analysis | C1vsC2 | C1vsC3 | C2vsC3 | T1vsT2 | T1vsT3 | T2vsT3 |
|---------------|--------|--------|--------|--------|--------|--------|
| 617           | 865    | 298    | 436    | 774    | 394    | 353    |

The number of DMR found for each analysis. All DMR have at least two significant windows at a p-value threshold of 1e-07.

Overlapping DMR

The following figures show the number of overlapping DMR between each pairwise analysis and the full analysis

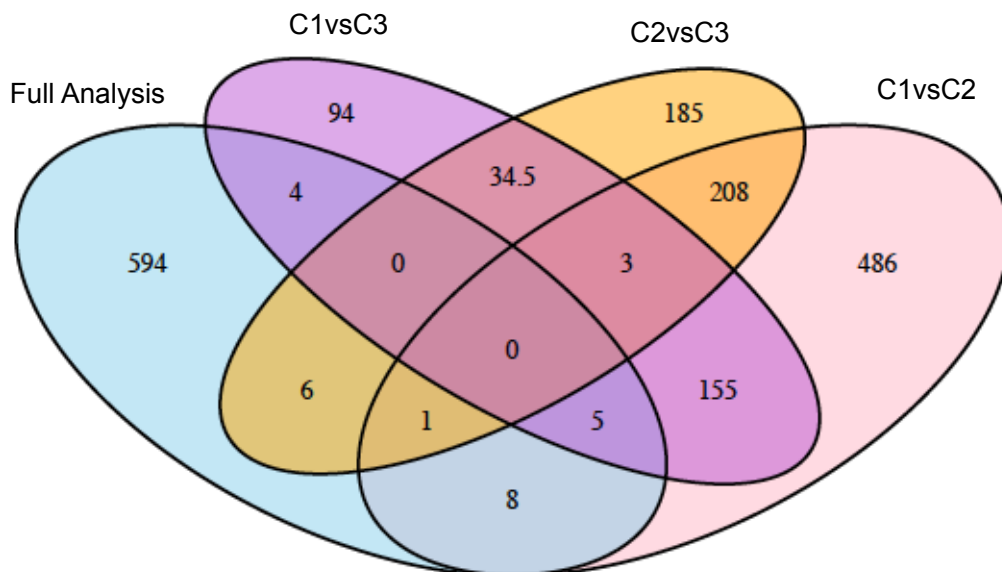

This figure shows the overlapping DMR between the control vs. control pairwise analyses and the full analysis.

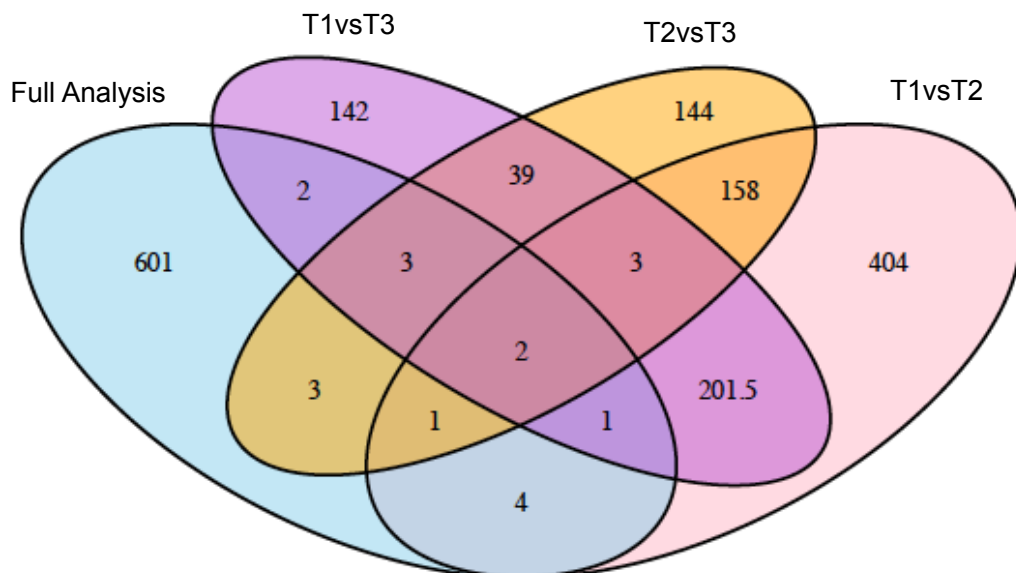

This figure shows the overlapping DMR between the treatment vs. treatment pairwise analyses and the full analysis.
