# Supplementary material for: Mercury-induced epigenetic transgenerational inheritance of abnormal neurobehavior is correlated with sperm epimutations in zebrafish
Source: PubMed Central journal article supplement (PMC5413066; doi:10.1371/journal.pone.0176155), 2017-05-02

REGULATION OF ACTIN CYTOSKELETON

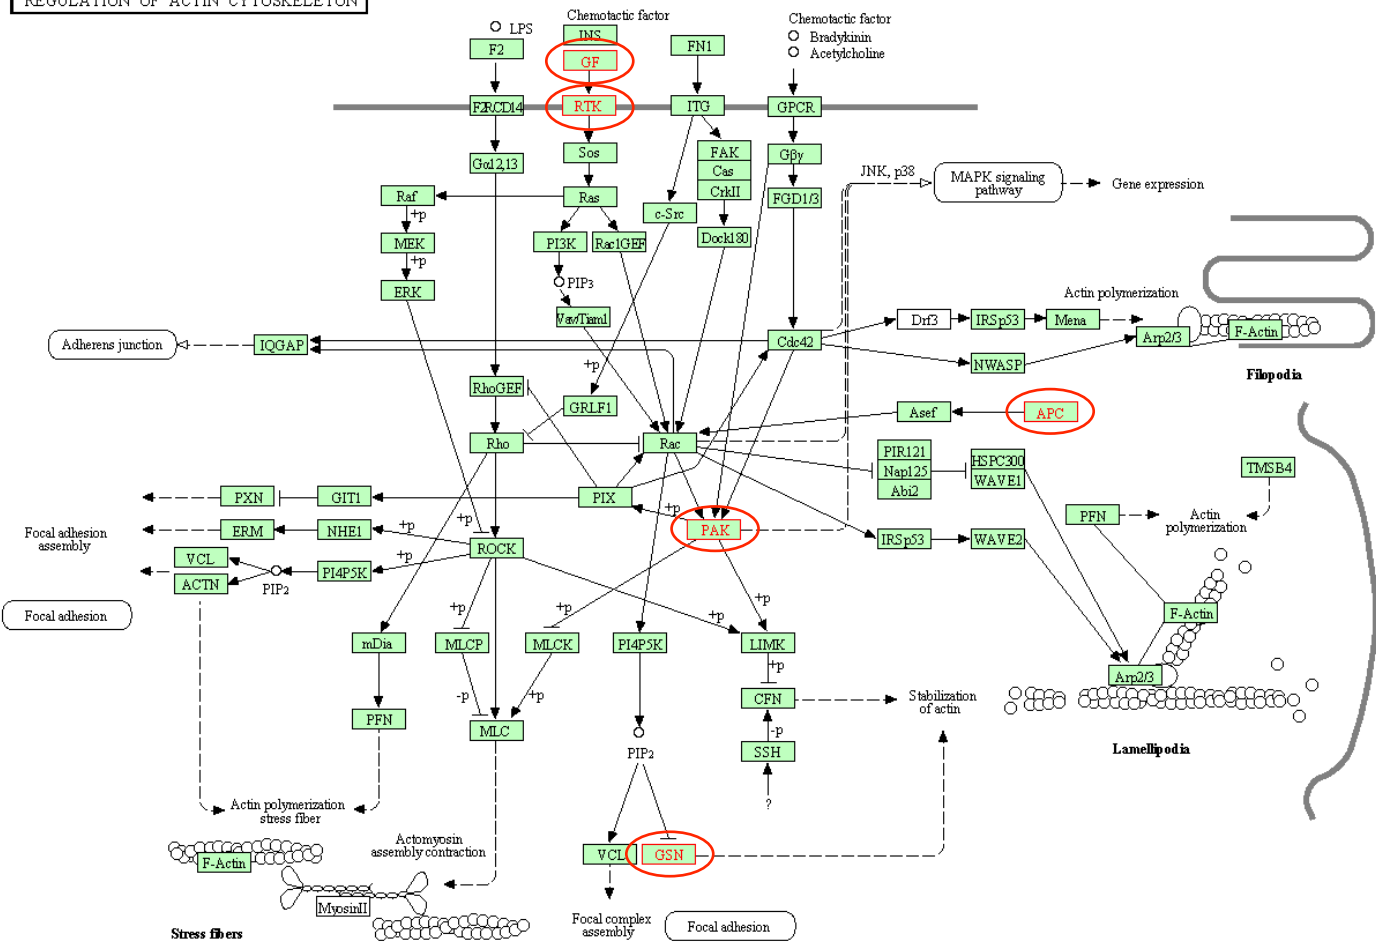

Supplement: pone.0176155.s003.pdf [file pone.0176155.s003.pdf]
