# Supplementary material for: Mercury-induced epigenetic transgenerational inheritance of abnormal neurobehavior is correlated with sperm epimutations in zebrafish
Source: PubMed Central journal article supplement (PMC5413066; doi:10.1371/journal.pone.0176155), 2017-05-02
Supplement: pone.0176155.s004.pdf [file pone.0176155.s004.pdf]

**Supplemental Table S1. Total Hg Analysis and Evaluation of Dosimetry**

| Exposure (nM) |             | Tissue Dose (ppb) |               |
|---------------|-------------|-------------------|---------------|
| Nominal       | Measured    | F0 generation     | F2 generation |
| 0             | 0.15 ± 0.02 | 5.5 ± 0.5         | 9.0 ± 0.4     |
| 1             | 1.5 ± 0.4   | 19.4 ± 1.0        | 8.2 ± 0.2     |
| 3             | 2.9 ± 0.2   | 51.0 ± 3.5        | 9.2 ± 0.1     |
| 10            | 10 ± 0.05   | 257.4 ± 10.7      | 9.1 ± 0.2     |
| 30            | 32 ± 0.6    | 836.1 ± 67.8      | 8.7 ± 0.4     |
| 100           | 104 ± 0.4   | 2819.2 ± 152.4    | 8.5 ± 0.4     |
