# Supplementary material for: Mercury-induced epigenetic transgenerational inheritance of abnormal neurobehavior is correlated with sperm epimutations in zebrafish
Source: PubMed Central journal article supplement (PMC5413066; doi:10.1371/journal.pone.0176155), 2017-05-02
Supplement: pone.0176155.s005.pdf [file pone.0176155.s005.pdf]

**Supplemental Table S2: Evaluation of expected versus observed inheritance of neurobehavioral phenotypes.**

| F2 lineage (nM) | n  | Neither Phenotype | Visual deficit | Hyperactivity | Both Phenotypes |          | Chi-square                             |
|-----------------|----|-------------------|----------------|---------------|-----------------|----------|----------------------------------------|
|                 |    |                   |                |               | Expected        | Observed |                                        |
| 0               | 15 | 87% (13)          | 7% (1)         | 7% (1)        | 0% (0)          | 0% (0)   | $\chi^2=0.0670$<br>$df=4$<br>$p=0.999$ |
| 1               | 20 | 5% (1)            | 65% (13)       | 65% (13)      | 42% (8)         | 35% (7)  |                                        |
| 3               | 16 | 6% (1)            | 93% (14)       | 38% (6)       | 35% (6)         | 31% (5)  |                                        |
| 10              | 18 | 6% (1)            | 72% (13)       | 61% (11)      | 44% (8)         | 39% (7)  |                                        |
| 30              | 17 | 6% (1)            | 71% (12)       | 71% (12)      | 50% (9)         | 47% (8)  |                                        |
| 100             | 15 | 0% (0)            | 93% (14)       | 60% (9)       | 56% (8)         | 53% (8)  |                                        |
