# Supplementary material for: Mercury-induced epigenetic transgenerational inheritance of abnormal neurobehavior is correlated with sperm epimutations in zebrafish
Source: PubMed Central journal article supplement (PMC5413066; doi:10.1371/journal.pone.0176155), 2017-05-02
Supplement: pone.0176155.s006.pdf [file pone.0176155.s006.pdf]

Supplemental Table S3 F0 Generation DMR List

| DMR Name      | Chr | Start    | Length (bp) | # Signature Windows | min P Value | CpG # | CpG Density (#/100bp) | Gene Association |
|---------------|-----|----------|-------------|---------------------|-------------|-------|-----------------------|------------------|
| DMR2:34637701 | 2   | 34637701 | 2100        | 2                   | 3.64E-09    | 74    | 3.5                   | astn1            |
| DMR2:38796201 | 2   | 38796201 | 400         | 2                   | 6.31E-10    | 5     | 1.2                   |                  |
| DMR3:53595001 | 3   | 53595001 | 1900        | 4                   | 2.71E-10    | 52    | 2.7                   | col5a3a          |
| DMR3:57175901 | 3   | 57175901 | 4800        | 2                   | 5.66E-09    | 143   | 2.9                   | fscn2a           |
| DMR4:6914401  | 4   | 6914401  | 1200        | 4                   | 4.42E-10    | 14    | 1.1                   | dock4b           |
| DMR4:7479801  | 4   | 7479801  | 1600        | 4                   | 1.36E-17    | 16    | 1                     | cald1l2          |
| DMR4:25320901 | 4   | 25320901 | 900         | 4                   | 7.17E-11    | 12    | 1.3                   | sfmtb2           |
| DMR4:26986301 | 4   | 26986301 | 5600        | 4                   | 1.38E-09    | 260   | 4.6                   | slc6a1l          |
| DMR4:29125601 | 4   | 29125601 | 4600        | 3                   | 3.10E-10    | 169   | 3.6                   | fb11h05          |
| DMR4:29131601 | 4   | 29131601 | 3500        | 3                   | 1.35E-16    | 75    | 2.1                   | fb11h05          |
| DMR4:29170301 | 4   | 29170301 | 800         | 3                   | 2.77E-12    | 22    | 2.7                   |                  |
| DMR4:29690601 | 4   | 29690601 | 4300        | 8                   | 9.97E-34    | 60    | 1.3                   | ch211-214c20.1   |
| DMR4:30279501 | 4   | 30279501 | 1200        | 4                   | 3.88E-11    | 29    | 2.4                   | RNH1 (6 of 55)   |
| DMR4:30506601 | 4   | 30506601 | 1900        | 4                   | 2.87E-11    | 37    | 1.9                   | dkey-199m13.6    |
| DMR4:31576001 | 4   | 31576001 | 1700        | 3                   | 3.49E-10    | 40    | 2.3                   |                  |
| DMR4:32114901 | 4   | 32114901 | 8800        | 3                   | 6.80E-10    | 261   | 2.9                   |                  |
| DMR4:32127101 | 4   | 32127101 | 1400        | 2                   | 9.85E-11    | 58    | 4.1                   |                  |
| DMR4:33270701 | 4   | 33270701 | 2000        | 5                   | 3.76E-11    | 59    | 2.9                   |                  |
| DMR4:33640001 | 4   | 33640001 | 500         | 3                   | 5.12E-20    | 6     | 1.2                   |                  |
| DMR4:33980601 | 4   | 33980601 | 1500        | 3                   | 5.19E-09    | 26    | 1.7                   | dkey-28i19.3     |
| DMR4:34064901 | 4   | 34064901 | 1700        | 3                   | 4.20E-23    | 101   | 5.9                   | U1               |
| DMR4:34967901 | 4   | 34967901 | 2300        | 3                   | 2.51E-30    | 71    | 3                     |                  |
| DMR4:34980901 | 4   | 34980901 | 10800       | 2                   | 2.46E-15    | 360   | 3.3                   |                  |
| DMR4:36150301 | 4   | 36150301 | 1800        | 5                   | 1.29E-14    | 53    | 2.9                   |                  |
| DMR4:36156101 | 4   | 36156101 | 800         | 3                   | 1.40E-11    | 18    | 2.2                   |                  |
| DMR4:36157901 | 4   | 36157901 | 2300        | 6                   | 1.52E-12    | 42    | 1.8                   |                  |
| DMR4:36504301 | 4   | 36504301 | 3500        | 9                   | 6.10E-12    | 72    | 2                     | dkeyp-87d1.10    |
| DMR4:36909601 | 4   | 36909601 | 14200       | 8                   | 3.82E-14    | 516   | 3.6                   |                  |
| DMR4:37866401 | 4   | 37866401 | 2200        | 2                   | 6.86E-15    | 48    | 2.1                   | RNH1 (39 of 55)  |
| DMR4:39532701 | 4   | 39532701 | 5400        | 3                   | 2.64E-10    | 112   | 2                     | dkey-16p6.1      |
| DMR4:39614001 | 4   | 39614001 | 1600        | 7                   | 5.61E-20    | 36    | 2.2                   | 174700           |
| DMR4:40514901 | 4   | 40514901 | 900         | 2                   | 2.90E-09    | 37    | 4.1                   |                  |
| DMR4:40931001 | 4   | 40931001 | 4200        | 9                   | 9.30E-17    | 117   | 2.7                   | ch211-231i17.4   |
| DMR4:42207201 | 4   | 42207201 | 1600        | 4                   | 2.95E-14    | 62    | 3.8                   |                  |
| DMR4:43184201 | 4   | 43184201 | 5200        | 2                   | 7.77E-09    | 162   | 3.1                   | ch211-226o13.1   |
| DMR4:44610401 | 4   | 44610401 | 6700        | 8                   | 7.06E-16    | 308   | 4.5                   | ch211-162i8.7    |
| DMR4:44695001 | 4   | 44695001 | 2600        | 3                   | 1.56E-10    | 64    | 2.4                   | TRIM14 (4 of 28) |
| DMR4:44702301 | 4   | 44702301 | 1700        | 3                   | 2.18E-18    | 40    | 2.3                   | dkey-256i11.2    |
| DMR4:44992201 | 4   | 44992201 | 4500        | 6                   | 1.02E-10    | 63    | 1.4                   | ch211-162i8.7    |
| DMR4:45117401 | 4   | 45117401 | 3500        | 7                   | 7.32E-13    | 82    | 2.3                   |                  |
| DMR4:45259701 | 4   | 45259701 | 3900        | 4                   | 2.57E-21    | 73    | 1.8                   | ch211-215p11.3   |
| DMR4:45266201 | 4   | 45266201 | 4100        | 5                   | 2.96E-11    | 115   | 2.8                   |                  |
| DMR4:45277301 | 4   | 45277301 | 600         | 2                   | 2.68E-08    | 17    | 2.8                   |                  |
| DMR4:45704101 | 4   | 45704101 | 1700        | 5                   | 2.38E-11    | 55    | 3.2                   |                  |
| DMR4:45955701 | 4   | 45955701 | 11200       | 8                   | 2.42E-12    | 275   | 2.4                   | dkey-240b24.1    |
| DMR4:45970001 | 4   | 45970001 | 2500        | 3                   | 7.91E-12    | 91    | 3.6                   | BX470149.1       |
| DMR4:47020701 | 4   | 47020701 | 1900        | 2                   | 3.66E-15    | 38    | 2                     |                  |

|               |   |          |       |    |          |     |     |                    |
|---------------|---|----------|-------|----|----------|-----|-----|--------------------|
| DMR4:47079901 | 4 | 47079901 | 3000  | 3  | 1.33E-10 | 105 | 3.5 |                    |
| DMR4:47083901 | 4 | 47083901 | 9900  | 6  | 3.27E-20 | 278 | 2.8 |                    |
| DMR4:47163001 | 4 | 47163001 | 21300 | 5  | 1.66E-14 | 689 | 3.2 |                    |
| DMR4:47389201 | 4 | 47389201 | 6800  | 2  | 2.11E-08 | 185 | 2.7 |                    |
| DMR4:47400601 | 4 | 47400601 | 1300  | 2  | 2.49E-10 | 49  | 3.7 |                    |
| DMR4:47403401 | 4 | 47403401 | 8300  | 5  | 1.60E-10 | 184 | 2.2 |                    |
| DMR4:47413001 | 4 | 47413001 | 1200  | 3  | 7.85E-13 | 25  | 2   |                    |
| DMR4:47448201 | 4 | 47448201 | 1100  | 2  | 8.34E-15 | 30  | 2.7 | ch211-42i6.2       |
| DMR4:47454401 | 4 | 47454401 | 5100  | 38 | 2.08E-27 | 258 | 5   | ch211-42i6.2       |
| DMR4:47481601 | 4 | 47481601 | 2200  | 8  | 6.98E-20 | 35  | 1.5 |                    |
| DMR4:47736101 | 4 | 47736101 | 3600  | 2  | 1.15E-08 | 36  | 1   | NA                 |
| DMR4:47792001 | 4 | 47792001 | 14600 | 7  | 3.11E-12 | 358 | 2.4 | ch211-197e7.3      |
| DMR4:47860901 | 4 | 47860901 | 12400 | 18 | 2.44E-23 | 420 | 3.3 | ch211-197e7.2      |
| DMR4:47942501 | 4 | 47942501 | 3500  | 5  | 4.16E-12 | 109 | 3.1 |                    |
| DMR4:47963601 | 4 | 47963601 | 8300  | 41 | 3.55E-30 | 193 | 2.3 | ch211-197e7.1      |
| DMR4:48007701 | 4 | 48007701 | 12700 | 31 | 3.36E-16 | 402 | 3.1 | RNH1 (7 of 55)     |
| DMR4:48028101 | 4 | 48028101 | 23100 | 50 | 6.40E-31 | 699 | 3   | RNH1 (7 of 55)     |
| DMR4:48052301 | 4 | 48052301 | 2800  | 3  | 1.56E-09 | 60  | 2.1 | RNH1 (7 of 55)     |
| DMR4:48060201 | 4 | 48060201 | 2200  | 5  | 1.06E-21 | 53  | 2.4 | RNH1 (7 of 55)     |
| DMR4:48072401 | 4 | 48072401 | 1200  | 8  | 1.31E-27 | 39  | 3.2 | RNH1 (7 of 55)     |
| DMR4:48075001 | 4 | 48075001 | 8100  | 4  | 5.00E-13 | 278 | 3.4 | RNH1 (7 of 55)     |
| DMR4:48095701 | 4 | 48095701 | 2800  | 3  | 1.12E-11 | 80  | 2.8 | RNH1 (7 of 55)     |
| DMR4:48103601 | 4 | 48103601 | 5100  | 5  | 2.48E-16 | 158 | 3   | RNH1 (7 of 55)     |
| DMR4:48173901 | 4 | 48173901 | 11300 | 12 | 1.81E-24 | 245 | 2.1 |                    |
| DMR4:48201001 | 4 | 48201001 | 3000  | 6  | 1.67E-20 | 129 | 4.3 |                    |
| DMR4:48244901 | 4 | 48244901 | 2000  | 2  | 1.69E-09 | 60  | 3   |                    |
| DMR4:48425601 | 4 | 48425601 | 7400  | 2  | 1.77E-12 | 163 | 2.2 | 173619             |
| DMR4:48454401 | 4 | 48454401 | 7000  | 3  | 4.29E-09 | 350 | 5   | 173619;dkey-16p6.1 |
| DMR4:48593601 | 4 | 48593601 | 1400  | 2  | 7.45E-09 | 36  | 2.5 | 173619             |
| DMR4:48788101 | 4 | 48788101 | 10000 | 5  | 5.34E-12 | 247 | 2.4 |                    |
| DMR4:48800401 | 4 | 48800401 | 3400  | 3  | 6.99E-12 | 68  | 2   |                    |
| DMR4:48863901 | 4 | 48863901 | 7400  | 22 | 4.99E-26 | 284 | 3.8 |                    |
| DMR4:48872801 | 4 | 48872801 | 4200  | 11 | 2.47E-21 | 88  | 2   |                    |
| DMR4:48976901 | 4 | 48976901 | 4800  | 3  | 3.35E-17 | 110 | 2.2 |                    |
| DMR4:49060001 | 4 | 49060001 | 4700  | 5  | 2.80E-14 | 168 | 3.5 |                    |
| DMR4:49117801 | 4 | 49117801 | 1700  | 3  | 2.35E-12 | 60  | 3.5 |                    |
| DMR4:49294001 | 4 | 49294001 | 900   | 4  | 2.84E-15 | 35  | 3.8 |                    |
| DMR4:49296501 | 4 | 49296501 | 1800  | 2  | 1.06E-21 | 85  | 4.7 |                    |
| DMR4:49333101 | 4 | 49333101 | 5200  | 9  | 1.37E-16 | 76  | 1.4 | dkey-82i20.3;      |
| DMR4:49361201 | 4 | 49361201 | 2200  | 4  | 4.75E-10 | 106 | 4.8 | dkey-82i20.3;      |
| DMR4:49379001 | 4 | 49379001 | 5100  | 4  | 8.10E-14 | 98  | 1.9 | dkey-82i20.3;      |
| DMR4:49421301 | 4 | 49421301 | 7800  | 3  | 2.35E-10 | 178 | 2.2 | dkey-82i20.3       |
| DMR4:49436801 | 4 | 49436801 | 4900  | 4  | 4.43E-09 | 111 | 2.2 | NA                 |
| DMR4:50122001 | 4 | 50122001 | 3300  | 3  | 1.20E-11 | 62  | 1.8 | dkey-22a18.1       |
| DMR4:50542601 | 4 | 50542601 | 11100 | 3  | 3.14E-11 | 331 | 2.9 |                    |
| DMR4:51339401 | 4 | 51339401 | 2500  | 9  | 4.32E-23 | 138 | 5.5 | dkey-250k10.1      |
| DMR4:51347901 | 4 | 51347901 | 1100  | 5  | 2.69E-16 | 24  | 2.1 | dkey-250k10.1      |
| DMR4:51353101 | 4 | 51353101 | 3800  | 5  | 1.61E-14 | 108 | 2.8 | dkey-250k10.1      |
| DMR4:52846601 | 4 | 52846601 | 1600  | 3  | 1.55E-13 | 38  | 2.3 |                    |
| DMR4:52939601 | 4 | 52939601 | 6400  | 13 | 3.01E-16 | 262 | 4   | dkey-56m15.9       |
| DMR4:52956401 | 4 | 52956401 | 2400  | 7  | 1.52E-16 | 55  | 2.2 | dkey-56m15.9       |

|               |   |          |       |    |          |      |     |                  |
|---------------|---|----------|-------|----|----------|------|-----|------------------|
| DMR4:53449201 | 4 | 53449201 | 3100  | 3  | 3.46E-10 | 99   | 3.1 | dkey-257e4.2     |
| DMR4:53590201 | 4 | 53590201 | 2900  | 2  | 6.74E-15 | 87   | 3   | ZFP28 (17 of 19) |
| DMR4:53870001 | 4 | 53870001 | 4100  | 2  | 3.99E-08 | 274  | 6.6 |                  |
| DMR4:54485701 | 4 | 54485701 | 900   | 2  | 6.92E-08 | 38   | 4.2 | ch211-237a4.2    |
| DMR4:57066201 | 4 | 57066201 | 3600  | 3  | 6.39E-20 | 143  | 3.9 | ch211-233h3.1    |
| DMR4:57094301 | 4 | 57094301 | 7600  | 4  | 3.32E-14 | 199  | 2.6 | ch211-233h3.1    |
| DMR4:57106001 | 4 | 57106001 | 2000  | 2  | 2.29E-16 | 34   | 1.7 | ch211-233h3.1    |
| DMR4:57109501 | 4 | 57109501 | 6600  | 8  | 1.29E-10 | 141  | 2.1 |                  |
| DMR4:57147501 | 4 | 57147501 | 5000  | 3  | 6.79E-16 | 103  | 2   | RNH1 (4 of 55)   |
| DMR4:57230701 | 4 | 57230701 | 6400  | 2  | 2.67E-09 | 108  | 1.6 | ch211-241n15.1   |
| DMR4:57308501 | 4 | 57308501 | 6600  | 24 | 9.44E-48 | 82   | 1.2 | ch211-241n15.1   |
| DMR4:57412801 | 4 | 57412801 | 3000  | 3  | 1.22E-11 | 72   | 2.4 |                  |
| DMR4:57417301 | 4 | 57417301 | 5200  | 5  | 1.09E-11 | 146  | 2.8 |                  |
| DMR4:57424301 | 4 | 57424301 | 5400  | 2  | 3.73E-11 | 156  | 2.8 |                  |
| DMR4:57453101 | 4 | 57453101 | 1300  | 2  | 3.03E-09 | 45   | 3.4 | dkey-149m13.2    |
| DMR4:57462301 | 4 | 57462301 | 400   | 2  | 4.32E-11 | 13   | 3.2 |                  |
| DMR4:57497101 | 4 | 57497101 | 8000  | 8  | 8.46E-26 | 270  | 3.3 |                  |
| DMR4:57506101 | 4 | 57506101 | 5100  | 2  | 6.48E-16 | 102  | 2   |                  |
| DMR4:57514901 | 4 | 57514901 | 3100  | 4  | 1.13E-12 | 55   | 1.7 |                  |
| DMR4:57555201 | 4 | 57555201 | 42500 | 10 | 1.17E-09 | 1582 | 3.7 |                  |
| DMR4:57635201 | 4 | 57635201 | 4800  | 9  | 6.02E-12 | 135  | 2.8 | 173710           |
| DMR4:57694501 | 4 | 57694501 | 6800  | 4  | 9.14E-12 | 220  | 3.2 |                  |
| DMR4:57720201 | 4 | 57720201 | 3200  | 5  | 2.82E-28 | 65   | 2   |                  |
| DMR4:57782601 | 4 | 57782601 | 3300  | 13 | 7.85E-21 | 54   | 1.6 | dkey-196n19.2    |
| DMR4:57871901 | 4 | 57871901 | 1300  | 2  | 5.73E-11 | 1    | 0   |                  |
| DMR4:57928701 | 4 | 57928701 | 3600  | 3  | 1.39E-22 | 113  | 3.1 | ch211-178j18.2   |
| DMR4:57989001 | 4 | 57989001 | 3400  | 8  | 9.85E-22 | 51   | 1.5 |                  |
| DMR4:58020001 | 4 | 58020001 | 1700  | 4  | 1.15E-17 | 70   | 4.1 | ch211-178j18.4   |
| DMR4:58047101 | 4 | 58047101 | 4900  | 10 | 4.18E-36 | 158  | 3.2 | U1               |
| DMR4:58063601 | 4 | 58063601 | 18100 | 7  | 5.14E-14 | 1142 | 6.3 | U1               |
| DMR4:58082901 | 4 | 58082901 | 800   | 2  | 3.61E-08 | 33   | 4.1 |                  |
| DMR4:58271901 | 4 | 58271901 | 6300  | 3  | 8.00E-09 | 226  | 3.5 | BX465848.1       |
| DMR4:58323301 | 4 | 58323301 | 2100  | 2  | 4.60E-09 | 32   | 1.5 | dkey-248e17.7    |
| DMR4:58451201 | 4 | 58451201 | 4500  | 5  | 1.62E-11 | 183  | 4   |                  |
| DMR4:58493101 | 4 | 58493101 | 3800  | 2  | 2.81E-08 | 95   | 2.5 |                  |
| DMR4:58501801 | 4 | 58501801 | 7600  | 11 | 4.06E-13 | 265  | 3.4 |                  |
| DMR4:58538501 | 4 | 58538501 | 4300  | 3  | 1.62E-13 | 120  | 2.7 |                  |
| DMR4:58637101 | 4 | 58637101 | 1200  | 2  | 2.29E-09 | 24   | 2   | dkey-211i20.5    |
| DMR4:58654201 | 4 | 58654201 | 3100  | 5  | 3.42E-11 | 80   | 2.5 | dkey-211i20.2    |
| DMR4:58668001 | 4 | 58668001 | 3600  | 6  | 8.93E-15 | 98   | 2.7 | dkey-211i20.2    |
| DMR4:58705601 | 4 | 58705601 | 900   | 3  | 5.33E-14 | 32   | 3.5 | dkey-211i20.2    |
| DMR4:58720601 | 4 | 58720601 | 3400  | 8  | 3.34E-12 | 91   | 2.6 | dkey-211i20.2    |
| DMR4:58753201 | 4 | 58753201 | 4200  | 2  | 2.86E-09 | 111  | 2.6 |                  |
| DMR4:58758601 | 4 | 58758601 | 3800  | 10 | 3.20E-13 | 91   | 2.3 |                  |
| DMR4:58764601 | 4 | 58764601 | 10500 | 31 | 5.60E-25 | 353  | 3.3 |                  |
| DMR4:58786201 | 4 | 58786201 | 6700  | 11 | 6.57E-12 | 122  | 1.8 |                  |
| DMR4:58888201 | 4 | 58888201 | 3400  | 4  | 6.38E-11 | 113  | 3.3 | dkey-204I2.3     |
| DMR4:58954601 | 4 | 58954601 | 3300  | 2  | 1.64E-08 | 73   | 2.2 | dkey-204I2.3     |
| DMR4:58967201 | 4 | 58967201 | 1500  | 6  | 9.93E-13 | 57   | 3.8 | dkey-204I2.3     |
| DMR4:58969801 | 4 | 58969801 | 3200  | 9  | 3.96E-11 | 54   | 1.6 | dkey-204I2.3     |
| DMR4:58999501 | 4 | 58999501 | 3000  | 3  | 5.15E-11 | 82   | 2.7 |                  |

|               |   |          |       |    |          |      |     |                   |
|---------------|---|----------|-------|----|----------|------|-----|-------------------|
| DMR4:59007101 | 4 | 59007101 | 2100  | 3  | 5.28E-12 | 38   | 1.8 |                   |
| DMR4:59125101 | 4 | 59125101 | 15400 | 8  | 1.09E-12 | 575  | 3.7 | dkey-9p20.9       |
| DMR4:59154001 | 4 | 59154001 | 2200  | 5  | 7.00E-15 | 41   | 1.8 |                   |
| DMR4:59209101 | 4 | 59209101 | 2600  | 2  | 1.18E-09 | 67   | 2.5 |                   |
| DMR4:59408801 | 4 | 59408801 | 2300  | 6  | 1.30E-16 | 57   | 2.4 |                   |
| DMR4:59554401 | 4 | 59554401 | 36100 | 18 | 2.73E-11 | 2230 | 6.1 | U1                |
| DMR4:59613801 | 4 | 59613801 | 1600  | 3  | 6.30E-10 | 60   | 3.7 |                   |
| DMR4:59695601 | 4 | 59695601 | 4400  | 5  | 3.28E-10 | 123  | 2.7 |                   |
| DMR4:59779301 | 4 | 59779301 | 2200  | 2  | 1.40E-10 | 50   | 2.2 | dkey-199m13.1     |
| DMR4:59861601 | 4 | 59861601 | 9000  | 4  | 3.23E-11 | 305  | 3.3 |                   |
| DMR4:59905301 | 4 | 59905301 | 8700  | 6  | 9.96E-17 | 190  | 2.1 | dkey-146c18.5     |
| DMR4:59925901 | 4 | 59925901 | 4800  | 4  | 2.28E-12 | 127  | 2.6 | RNH1 (37 of 55)   |
| DMR4:59955601 | 4 | 59955601 | 11600 | 11 | 2.56E-13 | 411  | 3.5 | dkey-146c18.5     |
| DMR4:63181501 | 4 | 63181501 | 1100  | 2  | 5.07E-10 | 29   | 2.6 | dkey-9i5.5        |
| DMR4:63231501 | 4 | 63231501 | 4600  | 4  | 3.06E-11 | 146  | 3.1 |                   |
| DMR4:63260201 | 4 | 63260201 | 11100 | 3  | 1.41E-08 | 414  | 3.7 |                   |
| DMR4:63302501 | 4 | 63302501 | 5200  | 13 | 3.11E-22 | 128  | 2.4 |                   |
| DMR4:63477901 | 4 | 63477901 | 400   | 2  | 3.26E-16 | 3    | 0.7 | ZFP28 (8 of 19)   |
| DMR4:64608901 | 4 | 64608901 | 1000  | 4  | 4.28E-11 | 45   | 4.5 | 174311            |
| DMR4:64644301 | 4 | 64644301 | 3300  | 2  | 2.52E-09 | 61   | 1.8 | 174311            |
| DMR4:66478801 | 4 | 66478801 | 3100  | 7  | 2.37E-13 | 82   | 2.6 | dkey-237g15.2     |
| DMR4:66661501 | 4 | 66661501 | 7200  | 2  | 2.12E-15 | 293  | 4   |                   |
| DMR4:66805101 | 4 | 66805101 | 2400  | 2  | 2.28E-14 | 64   | 2.6 | dkey-264f17.1     |
| DMR4:67433401 | 4 | 67433401 | 25600 | 37 | 1.88E-15 | 1616 | 6.3 | U1                |
| DMR4:67491001 | 4 | 67491001 | 2200  | 7  | 3.38E-11 | 49   | 2.2 | ch211-120c15.2    |
| DMR4:67494501 | 4 | 67494501 | 700   | 2  | 5.84E-08 | 15   | 2.1 | ch211-120c15.2    |
| DMR4:67506201 | 4 | 67506201 | 8100  | 3  | 6.20E-09 | 304  | 3.7 | ch211-120c15.2    |
| DMR4:67527001 | 4 | 67527001 | 4000  | 2  | 9.12E-18 | 49   | 1.2 | dkey-246j6.2      |
| DMR4:67553101 | 4 | 67553101 | 6100  | 5  | 7.78E-14 | 130  | 2.1 | dkey-246j6.2      |
| DMR4:67560501 | 4 | 67560501 | 5900  | 3  | 7.34E-11 | 126  | 2.1 | dkey-246j6.2      |
| DMR4:67567601 | 4 | 67567601 | 700   | 2  | 3.19E-09 | 18   | 2.5 | ch211-120c15.3    |
| DMR4:67615701 | 4 | 67615701 | 2000  | 2  | 3.02E-10 | 66   | 3.3 | ch211-120c15.2    |
| DMR4:67669801 | 4 | 67669801 | 11400 | 10 | 6.82E-12 | 288  | 2.5 |                   |
| DMR4:67696201 | 4 | 67696201 | 3300  | 11 | 2.58E-22 | 61   | 1.8 | 174944            |
| DMR4:67751901 | 4 | 67751901 | 10900 | 20 | 7.04E-27 | 228  | 2   | dkey-238o14.6     |
| DMR4:67780901 | 4 | 67780901 | 4500  | 4  | 4.83E-14 | 99   | 2.2 |                   |
| DMR4:67804401 | 4 | 67804401 | 1700  | 2  | 6.40E-11 | 34   | 2   |                   |
| DMR4:67828601 | 4 | 67828601 | 13900 | 7  | 1.34E-10 | 375  | 2.6 | dkey-238o14.9     |
| DMR4:67874101 | 4 | 67874101 | 8400  | 11 | 1.55E-21 | 139  | 1.6 |                   |
| DMR4:67928701 | 4 | 67928701 | 54500 | 89 | 1.98E-17 | 3357 | 6.1 | U1                |
| DMR4:68042201 | 4 | 68042201 | 4400  | 3  | 1.18E-13 | 114  | 2.5 | dkey-3h2.4        |
| DMR4:68086601 | 4 | 68086601 | 10100 | 3  | 2.45E-10 | 440  | 4.3 | dkey-3h2.4        |
| DMR4:68116701 | 4 | 68116701 | 1000  | 2  | 4.64E-10 | 27   | 2.7 | dkey-3h2.4        |
| DMR4:68128701 | 4 | 68128701 | 4600  | 4  | 3.62E-12 | 103  | 2.2 | dkey-3h2.4        |
| DMR4:68175701 | 4 | 68175701 | 3900  | 6  | 3.57E-11 | 92   | 2.3 | dkey-3h2.4        |
| DMR4:68185601 | 4 | 68185601 | 3200  | 6  | 2.32E-13 | 85   | 2.6 | dkey-3h2.4        |
| DMR4:68210601 | 4 | 68210601 | 3000  | 2  | 3.59E-11 | 129  | 4.3 | dkey-3h2.4        |
| DMR4:68260701 | 4 | 68260701 | 10800 | 4  | 8.08E-13 | 503  | 4.6 | dkey-3h2.4        |
| DMR4:68306001 | 4 | 68306001 | 5100  | 2  | 6.59E-11 | 88   | 1.7 | dkey-29j8.1       |
| DMR4:68326801 | 4 | 68326801 | 9200  | 7  | 5.74E-14 | 193  | 2   | TRIM14 (24 of 28) |
| DMR4:68367101 | 4 | 68367101 | 13200 | 7  | 8.42E-14 | 586  | 4.4 |                   |

|                |    |          |       |    |          |     |     |                |
|----------------|----|----------|-------|----|----------|-----|-----|----------------|
| DMR4:68702301  | 4  | 68702301 | 1500  | 2  | 1.18E-08 | 33  | 2.2 | dkey-28k24.2   |
| DMR4:68704801  | 4  | 68704801 | 2800  | 3  | 4.22E-09 | 65  | 2.3 |                |
| DMR4:68760201  | 4  | 68760201 | 900   | 2  | 6.48E-10 | 25  | 2.7 |                |
| DMR4:68804101  | 4  | 68804101 | 6200  | 2  | 9.05E-09 | 220 | 3.5 | dkey-254e13.6  |
| DMR4:69312801  | 4  | 69312801 | 10300 | 5  | 1.27E-15 | 449 | 4.3 | ch211-76m11.3  |
| DMR4:69367501  | 4  | 69367501 | 1100  | 2  | 3.41E-10 | 32  | 2.9 | ch211-76m11.8  |
| DMR4:69450801  | 4  | 69450801 | 1200  | 7  | 3.93E-19 | 31  | 2.5 | ch211-76m11.5  |
| DMR4:69458101  | 4  | 69458101 | 2700  | 6  | 6.23E-10 | 44  | 1.6 | ch211-76m11.5  |
| DMR4:69461901  | 4  | 69461901 | 3600  | 5  | 1.28E-23 | 68  | 1.8 | ch211-76m11.5  |
| DMR4:69498101  | 4  | 69498101 | 1000  | 4  | 5.23E-11 | 28  | 2.8 | ch211-76m11.5  |
| DMR4:69560401  | 4  | 69560401 | 3500  | 3  | 6.48E-16 | 90  | 2.5 | dkey-27n6.4    |
| DMR4:69675101  | 4  | 69675101 | 2400  | 5  | 9.56E-37 | 59  | 2.4 | dkeyp-4f2.1    |
| DMR4:71674701  | 4  | 71674701 | 5100  | 2  | 1.75E-12 | 174 | 3.4 | 162958         |
| DMR4:73099301  | 4  | 73099301 | 3200  | 13 | 4.26E-15 | 102 | 3.1 |                |
| DMR4:73126801  | 4  | 73126801 | 4800  | 7  | 1.49E-17 | 181 | 3.7 |                |
| DMR4:73395701  | 4  | 73395701 | 2700  | 2  | 2.72E-09 | 31  | 1.1 | PHF21B         |
| DMR4:74622301  | 4  | 74622301 | 200   | 2  | 4.76E-13 | 2   | 1   | ch211-106j21.5 |
| DMR4:76085901  | 4  | 76085901 | 1500  | 2  | 4.71E-16 | 17  | 1.1 |                |
| DMR4:76150501  | 4  | 76150501 | 2400  | 2  | 6.55E-14 | 174 | 7.2 |                |
| DMR4:76592301  | 4  | 76592301 | 1800  | 7  | 8.02E-15 | 18  | 1   | pacsin2;terfa  |
| DMR5:433201    | 5  | 433201   | 400   | 2  | 2.14E-09 | 2   | 0.5 | thap1          |
| DMR5:1172501   | 5  | 1172501  | 11500 | 7  | 4.83E-11 | 83  | 0.7 |                |
| DMR6:1313101   | 6  | 1313101  | 2700  | 12 | 3.72E-32 | 83  | 3   |                |
| DMR7:16313501  | 7  | 16313501 | 6100  | 2  | 5.77E-12 | 112 | 1.8 |                |
| DMR7:18169701  | 7  | 18169701 | 1600  | 3  | 1.31E-10 | 59  | 3.6 |                |
| DMR7:19951901  | 7  | 19951901 | 400   | 2  | 4.58E-28 | 9   | 2.2 | CU019646.1     |
| DMR8:52201101  | 8  | 52201101 | 3400  | 6  | 2.15E-21 | 73  | 2.1 | tcf7l1b        |
| DMR8:52435501  | 8  | 52435501 | 3500  | 2  | 4.70E-11 | 155 | 4.4 | gins4          |
| DMR8:52846001  | 8  | 52846001 | 1100  | 2  | 1.73E-15 | 21  | 1.9 |                |
| DMR8:53196401  | 8  | 53196401 | 4500  | 4  | 4.09E-09 | 241 | 5.3 | cacna1db       |
| DMR9:53496501  | 9  | 53496501 | 3500  | 2  | 2.25E-09 | 107 | 3   | CABZ01054962.1 |
| DMR10:6863601  | 10 | 6863601  | 1500  | 2  | 1.55E-11 | 45  | 3   | ppip5k2        |
| DMR10:20834601 | 10 | 20834601 | 600   | 2  | 1.67E-09 | 19  | 3.1 |                |
| DMR10:23174401 | 10 | 23174401 | 700   | 5  | 1.11E-17 | 27  | 3.8 |                |
| DMR11:27863601 | 11 | 27863601 | 1000  | 5  | 3.84E-14 | 23  | 2.3 | ch211-220m17.6 |
| DMR11:29151701 | 11 | 29151701 | 1700  | 2  | 7.58E-09 | 55  | 3.2 | arhgef10la     |
| DMR14:3439901  | 14 | 3439901  | 5000  | 4  | 1.54E-11 | 149 | 2.9 |                |
| DMR14:49679901 | 14 | 49679901 | 800   | 2  | 1.42E-09 | 15  | 1.8 |                |
| DMR14:50908501 | 14 | 50908501 | 300   | 2  | 4.02E-22 | 5   | 1.6 |                |
| DMR14:51233201 | 14 | 51233201 | 6100  | 3  | 2.17E-17 | 148 | 2.4 |                |
| DMR14:51898101 | 14 | 51898101 | 2800  | 9  | 5.10E-21 | 17  | 0.6 | atp6v0e1       |
| DMR15:30691901 | 15 | 30691901 | 1500  | 3  | 4.07E-10 | 51  | 3.4 | msi2b          |
| DMR15:34472201 | 15 | 34472201 | 3500  | 2  | 1.83E-10 | 87  | 2.4 |                |
| DMR15:36875901 | 15 | 36875901 | 600   | 2  | 7.11E-09 | 8   | 1.3 |                |
| DMR15:36993601 | 15 | 36993601 | 6000  | 3  | 5.00E-11 | 167 | 2.7 |                |
| DMR15:39000301 | 15 | 39000301 | 2200  | 2  | 2.16E-10 | 34  | 1.5 |                |
| DMR15:39669001 | 15 | 39669001 | 2200  | 6  | 1.02E-22 | 24  | 1   | robo1          |
| DMR15:39828301 | 15 | 39828301 | 1100  | 2  | 1.04E-11 | 18  | 1.6 | t2gtl4a        |
| DMR15:39906501 | 15 | 39906501 | 3500  | 3  | 1.20E-15 | 116 | 3.3 | CR626875.1     |
| DMR15:39990501 | 15 | 39990501 | 3900  | 2  | 3.19E-14 | 87  | 2.2 |                |
| DMR15:41062101 | 15 | 41062101 | 800   | 2  | 1.02E-09 | 39  | 4.8 |                |

|                |    |          |       |    |          |     |     |              |
|----------------|----|----------|-------|----|----------|-----|-----|--------------|
| DMR15:41124001 | 15 | 41124001 | 2700  | 5  | 1.63E-15 | 52  | 1.9 |              |
| DMR15:43848401 | 15 | 43848401 | 5400  | 4  | 6.46E-12 | 134 | 2.4 |              |
| DMR15:47004301 | 15 | 47004301 | 3000  | 2  | 2.47E-08 | 51  | 1.7 | inpp1a       |
| DMR16:36226201 | 16 | 36226201 | 3800  | 7  | 2.23E-10 | 102 | 2.6 |              |
| DMR16:36249101 | 16 | 36249101 | 29500 | 8  | 7.36E-10 | 672 | 2.2 |              |
| DMR16:36279601 | 16 | 36279601 | 4500  | 2  | 1.90E-09 | 127 | 2.8 |              |
| DMR16:36287601 | 16 | 36287601 | 20600 | 6  | 2.05E-10 | 350 | 1.6 |              |
| DMR16:36310901 | 16 | 36310901 | 5400  | 4  | 2.52E-09 | 149 | 2.7 |              |
| DMR16:36317601 | 16 | 36317601 | 14500 | 6  | 3.26E-10 | 294 | 2   |              |
| DMR16:36340501 | 16 | 36340501 | 14400 | 11 | 7.96E-11 | 352 | 2.4 |              |
| DMR16:36373201 | 16 | 36373201 | 4600  | 6  | 8.21E-11 | 80  | 1.7 |              |
| DMR16:36379601 | 16 | 36379601 | 33700 | 9  | 3.76E-10 | 783 | 2.3 | CR974440.1   |
| DMR16:36418601 | 16 | 36418601 | 12100 | 2  | 3.85E-08 | 245 | 2   |              |
| DMR16:36431701 | 16 | 36431701 | 15700 | 19 | 2.48E-11 | 327 | 2   |              |
| DMR16:36645401 | 16 | 36645401 | 2200  | 2  | 9.02E-09 | 53  | 2.4 |              |
| DMR17:50811801 | 17 | 50811801 | 1000  | 2  | 8.12E-12 | 32  | 3.2 |              |
| DMR17:50915701 | 17 | 50915701 | 4200  | 7  | 2.46E-19 | 130 | 3   |              |
| DMR17:50945101 | 17 | 50945101 | 2000  | 5  | 1.39E-12 | 68  | 3.4 | aqr          |
| DMR17:51062001 | 17 | 51062001 | 1000  | 3  | 1.05E-40 | 61  | 6.1 | paplna       |
| DMR17:51144601 | 17 | 51144601 | 500   | 2  | 3.65E-13 | 23  | 4.6 | trappc12     |
| DMR20:5911101  | 20 | 5911101  | 1200  | 4  | 5.50E-31 | 28  | 2.3 | nrxn3b       |
| DMR21:18842201 | 21 | 18842201 | 1000  | 2  | 2.34E-08 | 38  | 3.8 | dkey-65l23.2 |
| DMR21:24893001 | 21 | 24893001 | 2100  | 2  | 1.55E-10 | 39  | 1.8 |              |
| DMR21:26600201 | 21 | 26600201 | 12900 | 2  | 7.33E-10 | 691 | 5.3 |              |
| DMR22:53601    | 22 | 53601    | 2000  | 10 | 1.11E-11 | 147 | 7.3 | mrpl20       |
| DMR22:498001   | 22 | 498001   | 1600  | 2  | 2.92E-10 | 40  | 2.5 |              |
| DMR22:676601   | 22 | 676601   | 2800  | 2  | 1.56E-19 | 79  | 2.8 | arl8a        |
| DMR22:3303901  | 22 | 3303901  | 2800  | 2  | 1.33E-23 | 125 | 4.4 | gipc3        |
| DMR22:3771601  | 22 | 3771601  | 1400  | 8  | 3.05E-37 | 57  | 4   |              |
| DMR22:5169901  | 22 | 5169901  | 3700  | 2  | 5.60E-10 | 100 | 2.7 |              |
| DMR22:5267001  | 22 | 5267001  | 1400  | 2  | 5.71E-16 | 36  | 2.5 |              |
| DMR22:31811901 | 22 | 31811901 | 2100  | 2  | 6.13E-12 | 35  | 1.6 |              |
| DMR22:34701701 | 22 | 34701701 | 5000  | 4  | 4.74E-14 | 150 | 3   | CU896691.1   |
| DMR22:35403901 | 22 | 35403901 | 4000  | 2  | 3.89E-10 | 96  | 2.4 | HTR3C        |
| DMR23:8283001  | 23 | 8283001  | 3100  | 2  | 1.24E-09 | 77  | 2.4 |              |
| DMR23:8733301  | 23 | 8733301  | 2000  | 3  | 1.37E-12 | 46  | 2.3 | rgs19        |
| DMR23:12841301 | 23 | 12841301 | 4200  | 3  | 2.12E-12 | 134 | 3.1 |              |
| DMR23:39923401 | 23 | 39923401 | 600   | 2  | 6.48E-14 | 21  | 3.5 | ppp1r14c     |
| DMR23:44716801 | 23 | 44716801 | 3100  | 2  | 2.80E-08 | 109 | 3.5 | eif4e2rs1    |
| DMR24:2446201  | 24 | 2446201  | 1600  | 9  | 4.36E-20 | 57  | 3.5 | rreb1a       |
