# Supplementary material for: Mercury-induced epigenetic transgenerational inheritance of abnormal neurobehavior is correlated with sperm epimutations in zebrafish
Source: PubMed Central journal article supplement (PMC5413066; doi:10.1371/journal.pone.0176155), 2017-05-02
Supplement: pone.0176155.s007.pdf [file pone.0176155.s007.pdf]

Supplemental Table S4 F2 Generation DMR List

| DMR Name      | Chr | Start    | Length (bp) | #         |         | min P Value | CpG # | CpG Density (#/100bp) | Gene Association      |
|---------------|-----|----------|-------------|-----------|---------|-------------|-------|-----------------------|-----------------------|
|               |     |          |             | Signature | Windows |             |       |                       |                       |
| DMR1:50801    | 1   | 50801    | 9400        | 3         |         | 4.84E-14    | 227   | 2.4                   |                       |
| DMR1:138101   | 1   | 138101   | 12400       | 4         |         | 3.79E-14    | 311   | 2.5                   | f10;PROZ (2 of 2);f7i |
| DMR1:1820401  | 1   | 1820401  | 1600        | 3         |         | 6.23E-10    | 44    | 2.7                   | PTGFRN (1 of 2)       |
| DMR1:3489501  | 1   | 3489501  | 2900        | 2         |         | 1.82E-09    | 105   | 3.6                   |                       |
| DMR1:20390501 | 1   | 20390501 | 3900        | 7         |         | 3.72E-23    | 166   | 4.2                   |                       |
| DMR1:30600701 | 1   | 30600701 | 1900        | 2         |         | 2.76E-16    | 55    | 2.8                   | rims1b                |
| DMR1:30614301 | 1   | 30614301 | 7800        | 15        |         | 3.00E-15    | 287   | 3.6                   | rims1b                |
| DMR1:30638601 | 1   | 30638601 | 3100        | 3         |         | 5.13E-13    | 91    | 2.9                   | rims1b                |
| DMR1:31510501 | 1   | 31510501 | 4100        | 2         |         | 3.06E-10    | 54    | 1.3                   |                       |
| DMR1:31529201 | 1   | 31529201 | 800         | 2         |         | 3.36E-08    | 11    | 1.3                   |                       |
| DMR1:44449201 | 1   | 44449201 | 5300        | 2         |         | 3.31E-11    | 74    | 1.3                   | mucms1                |
| DMR1:47308001 | 1   | 47308001 | 600         | 2         |         | 1.68E-20    | 18    | 3                     | cfap58                |
| DMR1:48885801 | 1   | 48885801 | 900         | 3         |         | 2.19E-14    | 22    | 2.4                   | ch211-281g13.5        |
| DMR1:51030101 | 1   | 51030101 | 1300        | 6         |         | 2.99E-19    | 45    | 3.4                   |                       |
| DMR1:54091401 | 1   | 54091401 | 2000        | 3         |         | 9.13E-10    | 73    | 3.6                   | 136791                |
| DMR1:54259701 | 1   | 54259701 | 3800        | 5         |         | 1.81E-14    | 70    | 1.8                   | crtac1a               |
| DMR1:54393201 | 1   | 54393201 | 3600        | 3         |         | 1.51E-13    | 19    | 0.5                   |                       |
| DMR1:54466201 | 1   | 54466201 | 3200        | 4         |         | 3.03E-11    | 88    | 2.7                   | mb                    |
| DMR1:54529001 | 1   | 54529001 | 1300        | 2         |         | 1.41E-11    | 40    | 3                     | mri1                  |
| DMR1:54692701 | 1   | 54692701 | 4800        | 3         |         | 5.92E-11    | 100   | 2                     |                       |
| DMR1:54750201 | 1   | 54750201 | 11600       | 4         |         | 3.05E-11    | 132   | 1                     | SIGLEC1 (24 of 51)    |
| DMR1:54788101 | 1   | 54788101 | 2100        | 3         |         | 7.14E-13    | 40    | 1.9                   | SIGLEC1 (51 of 51)    |
| DMR1:54948301 | 1   | 54948301 | 3900        | 2         |         | 2.46E-11    | 79    | 2                     |                       |
| DMR1:54966901 | 1   | 54966901 | 17400       | 3         |         | 1.04E-12    | 417   | 2.3                   | dkey-9c18.12          |
| DMR1:55824201 | 1   | 55824201 | 1800        | 2         |         | 4.52E-10    | 33    | 1.8                   |                       |
| DMR1:55989101 | 1   | 55989101 | 3100        | 2         |         | 3.53E-09    | 62    | 2                     | CABZ01059415.2        |
| DMR1:57179801 | 1   | 57179801 | 5000        | 2         |         | 6.55E-13    | 99    | 1.9                   |                       |
| DMR1:57335801 | 1   | 57335801 | 3600        | 4         |         | 8.54E-10    | 159   | 4.4                   | ch211-114l13.4        |
| DMR1:57340601 | 1   | 57340601 | 700         | 2         |         | 2.98E-09    | 9     | 1.2                   | ch211-114l13.4        |
| DMR1:57373101 | 1   | 57373101 | 5200        | 2         |         | 4.48E-08    | 118   | 2.2                   | caspb1                |
| DMR1:58083101 | 1   | 58083101 | 3900        | 6         |         | 4.09E-15    | 331   | 8.4                   |                       |
| DMR2:1532301  | 2   | 1532301  | 3700        | 3         |         | 6.36E-15    | 49    | 1.3                   | adgrl2b.1             |
| DMR2:2001801  | 2   | 2001801  | 700         | 3         |         | 1.43E-11    | 18    | 2.5                   | pth1ra                |
| DMR2:4909301  | 2   | 4909301  | 4500        | 4         |         | 2.29E-11    | 110   | 2.4                   | tnk2b                 |
| DMR2:4915001  | 2   | 4915001  | 800         | 4         |         | 6.65E-15    | 30    | 3.7                   | tnk2b                 |
| DMR2:5487101  | 2   | 5487101  | 4200        | 6         |         | 2.77E-11    | 226   | 5.3                   | DUSP18                |
| DMR2:6025601  | 2   | 6025601  | 2200        | 9         |         | 2.96E-12    | 159   | 7.2                   | tmem125b              |
| DMR2:6174001  | 2   | 6174001  | 4800        | 2         |         | 3.35E-11    | 92    | 1.9                   | aldh9a1b              |
| DMR2:6287501  | 2   | 6287501  | 3700        | 2         |         | 1.15E-09    | 83    | 2.2                   |                       |
| DMR2:6351201  | 2   | 6351201  | 2000        | 5         |         | 2.80E-12    | 71    | 3.5                   |                       |
| DMR2:6392701  | 2   | 6392701  | 2300        | 4         |         | 4.29E-16    | 67    | 2.9                   | otol1a                |
| DMR2:6417001  | 2   | 6417001  | 11000       | 4         |         | 2.31E-11    | 284   | 2.5                   | SMC6                  |
| DMR2:6583401  | 2   | 6583401  | 11500       | 5         |         | 2.27E-16    | 277   | 2.4                   |                       |
| DMR2:6612801  | 2   | 6612801  | 2900        | 2         |         | 9.85E-12    | 55    | 1.8                   |                       |
| DMR2:8129401  | 2   | 8129401  | 1100        | 2         |         | 5.65E-09    | 38    | 3.4                   | ephb3a                |
| DMR2:8318901  | 2   | 8318901  | 1400        | 2         |         | 1.72E-10    | 26    | 1.8                   |                       |
| DMR2:8439601  | 2   | 8439601  | 900         | 2         |         | 2.58E-13    | 23    | 2.5                   |                       |
| DMR2:10654201 | 2   | 10654201 | 1000        | 2         |         | 1.80E-10    | 21    | 2.1                   | scinlb                |
| DMR2:11311101 | 2   | 11311101 | 900         | 3         |         | 8.42E-11    | 37    | 4.1                   | lrrc53                |
| DMR2:17892701 | 2   | 17892701 | 4900        | 2         |         | 4.15E-13    | 93    | 1.8                   |                       |
| DMR2:18351301 | 2   | 18351301 | 4600        | 2         |         | 9.29E-11    | 117   | 2.5                   |                       |

|               |   |          |       |    |          |     |      |                   |
|---------------|---|----------|-------|----|----------|-----|------|-------------------|
| DMR2:18578601 | 2 | 18578601 | 4400  | 2  | 1.09E-09 | 74  | 1.6  |                   |
| DMR2:20001201 | 2 | 20001201 | 1500  | 4  | 1.30E-12 | 40  | 2.6  |                   |
| DMR2:34632601 | 2 | 34632601 | 400   | 2  | 1.50E-11 | 16  | 4    | astn1             |
| DMR2:37190101 | 2 | 37190101 | 500   | 2  | 1.67E-09 | 23  | 4.6  |                   |
| DMR2:44005601 | 2 | 44005601 | 2200  | 2  | 9.95E-10 | 121 | 5.5  | nlrp5             |
| DMR2:47250001 | 2 | 47250001 | 3500  | 2  | 3.21E-08 | 78  | 2.2  |                   |
| DMR2:53948501 | 2 | 53948501 | 2200  | 2  | 1.46E-08 | 24  | 1    |                   |
| DMR2:55744801 | 2 | 55744801 | 2300  | 2  | 7.63E-11 | 60  | 2.6  |                   |
| DMR2:56637701 | 2 | 56637701 | 4300  | 2  | 2.41E-08 | 113 | 2.6  | CABZ01024426.1    |
| DMR2:57658801 | 2 | 57658801 | 7600  | 3  | 2.63E-12 | 327 | 4.3  |                   |
| DMR2:58650901 | 2 | 58650901 | 1800  | 2  | 1.94E-09 | 51  | 2.8  |                   |
| DMR2:58874601 | 2 | 58874601 | 5200  | 2  | 3.54E-09 | 248 | 4.7  | PTPRM             |
| DMR3:247801   | 3 | 247801   | 17100 | 3  | 3.90E-10 | 557 | 3.2  | BX004816.2        |
| DMR3:289401   | 3 | 289401   | 4900  | 2  | 1.60E-08 | 151 | 3    |                   |
| DMR3:364001   | 3 | 364001   | 7200  | 2  | 3.27E-10 | 291 | 4    | dkey-30g5.2       |
| DMR3:391101   | 3 | 391101   | 6000  | 5  | 2.43E-09 | 187 | 3.1  |                   |
| DMR3:398501   | 3 | 398501   | 8600  | 11 | 9.23E-14 | 125 | 1.4  | BX004816.4        |
| DMR3:2308001  | 3 | 2308001  | 2100  | 3  | 7.35E-12 | 38  | 1.8  | ch211-254c8.1     |
| DMR3:3143601  | 3 | 3143601  | 1200  | 2  | 1.20E-09 | 34  | 2.8  |                   |
| DMR3:3147701  | 3 | 3147701  | 6500  | 7  | 2.03E-12 | 237 | 3.6  |                   |
| DMR3:3162801  | 3 | 3162801  | 9100  | 9  | 1.06E-11 | 199 | 2.1  |                   |
| DMR3:3178901  | 3 | 3178901  | 1800  | 2  | 1.52E-09 | 66  | 3.6  |                   |
| DMR3:3188401  | 3 | 3188401  | 11700 | 4  | 9.55E-11 | 350 | 2.9  |                   |
| DMR3:3240901  | 3 | 3240901  | 1800  | 2  | 8.86E-11 | 32  | 1.7  |                   |
| DMR3:3324801  | 3 | 3324801  | 7400  | 2  | 1.22E-08 | 123 | 1.6  | CR388047.1        |
| DMR3:4201201  | 3 | 4201201  | 8300  | 3  | 8.33E-13 | 189 | 2.2  | dkey-36h5.1       |
| DMR3:4742901  | 3 | 4742901  | 4000  | 2  | 4.69E-08 | 90  | 2.2  | slc25a38a         |
| DMR3:5771201  | 3 | 5771201  | 2200  | 2  | 9.95E-10 | 49  | 2.2  |                   |
| DMR3:5784601  | 3 | 5784601  | 5600  | 2  | 1.08E-12 | 188 | 3.3  | 5S_rRNA           |
| DMR3:5802301  | 3 | 5802301  | 4300  | 4  | 8.21E-11 | 193 | 4.4  | TGFBR3L           |
| DMR3:5878601  | 3 | 5878601  | 1200  | 3  | 2.07E-19 | 78  | 6.5  | pkn1b             |
| DMR3:5887101  | 3 | 5887101  | 7200  | 10 | 1.04E-24 | 240 | 3.3  | pkn1b             |
| DMR3:5897901  | 3 | 5897901  | 800   | 2  | 6.99E-24 | 34  | 4.2  | pkn1b             |
| DMR3:5947101  | 3 | 5947101  | 7700  | 5  | 1.85E-15 | 226 | 2.9  |                   |
| DMR3:6007601  | 3 | 6007601  | 3300  | 2  | 5.04E-11 | 101 | 3    |                   |
| DMR3:6323901  | 3 | 6323901  | 1300  | 3  | 4.47E-11 | 39  | 3    | ch73-144l3.2      |
| DMR3:6469201  | 3 | 6469201  | 3300  | 2  | 5.07E-08 | 74  | 2.2  | ch211-12p12.4     |
| DMR3:6877601  | 3 | 6877601  | 3100  | 2  | 2.34E-10 | 42  | 1.3  | mast1b            |
| DMR3:7581301  | 3 | 7581301  | 4400  | 3  | 2.58E-16 | 114 | 2.5  | 174234            |
| DMR3:7925701  | 3 | 7925701  | 5100  | 10 | 2.29E-17 | 138 | 2.7  | hook2             |
| DMR3:7952001  | 3 | 7952001  | 1300  | 3  | 9.57E-13 | 44  | 3.3  |                   |
| DMR3:7959301  | 3 | 7959301  | 8300  | 3  | 9.25E-11 | 295 | 3.5  | ubn2b             |
| DMR3:8006101  | 3 | 8006101  | 1800  | 2  | 7.88E-08 | 51  | 2.8  | ubn2b             |
| DMR3:8026501  | 3 | 8026501  | 13400 | 5  | 3.80E-11 | 477 | 3.5  | trim35-25         |
| DMR3:8048501  | 3 | 8048501  | 5600  | 4  | 9.49E-11 | 133 | 2.3  | trim35-25         |
| DMR3:8063401  | 3 | 8063401  | 6100  | 9  | 3.05E-18 | 134 | 2.11 | trim35-23         |
| DMR3:8076201  | 3 | 8076201  | 8400  | 4  | 1.92E-10 | 155 | 1.8  | trim35-22         |
| DMR3:8086001  | 3 | 8086001  | 8800  | 5  | 1.94E-10 | 211 | 2.3  | trim35-22         |
| DMR3:8100101  | 3 | 8100101  | 3400  | 3  | 8.62E-12 | 92  | 2.7  | TRIM35 (28 of 38) |
| DMR3:8104701  | 3 | 8104701  | 9800  | 6  | 8.31E-14 | 128 | 1.3  | TRIM35 (28 of 38) |
| DMR3:8115901  | 3 | 8115901  | 5100  | 2  | 2.05E-09 | 150 | 2.9  | TRIM35 (26 of 38) |
| DMR3:8126701  | 3 | 8126701  | 10900 | 5  | 6.55E-12 | 466 | 4.2  | TRIM35 (26 of 38) |
| DMR3:8209101  | 3 | 8209101  | 6600  | 3  | 8.20E-13 | 111 | 1.6  |                   |
| DMR3:8271901  | 3 | 8271901  | 6300  | 2  | 2.24E-10 | 228 | 3.6  | TRIM35 (9 of 38)  |
| DMR3:8287501  | 3 | 8287501  | 8900  | 2  | 9.93E-17 | 238 | 2.6  | TRIM35 (9 of 38)  |

|               |   |          |       |    |          |     |     |                 |
|---------------|---|----------|-------|----|----------|-----|-----|-----------------|
| DMR3:8418501  | 3 | 8418501  | 5900  | 3  | 6.94E-16 | 182 | 3   | ch73-322f21.2   |
| DMR3:10293501 | 3 | 10293501 | 2200  | 3  | 9.20E-11 | 21  | 0.9 |                 |
| DMR3:12268901 | 3 | 12268901 | 3000  | 4  | 1.53E-20 | 29  | 0.9 |                 |
| DMR3:12395201 | 3 | 12395201 | 1500  | 2  | 1.74E-10 | 11  | 0.7 |                 |
| DMR3:12500901 | 3 | 12500901 | 1600  | 3  | 2.05E-12 | 53  | 3.3 | abca3b          |
| DMR3:13572001 | 3 | 13572001 | 7200  | 12 | 1.01E-42 | 102 | 1.4 |                 |
| DMR3:13606001 | 3 | 13606001 | 7000  | 5  | 5.87E-14 | 107 | 1.5 |                 |
| DMR3:13639201 | 3 | 13639201 | 3300  | 6  | 5.12E-15 | 120 | 3.6 |                 |
| DMR3:13975401 | 3 | 13975401 | 1900  | 2  | 3.41E-14 | 38  | 2   |                 |
| DMR3:14007701 | 3 | 14007701 | 2600  | 3  | 1.72E-25 | 63  | 2.4 | ch211-108d22.2  |
| DMR3:14011501 | 3 | 14011501 | 1400  | 5  | 6.70E-13 | 48  | 3.4 | ch211-108d22.2  |
| DMR3:14015501 | 3 | 14015501 | 3800  | 5  | 2.58E-36 | 184 | 4.8 | ch211-108d22.2  |
| DMR3:14081101 | 3 | 14081101 | 17600 | 18 | 4.52E-20 | 603 | 3.4 | 5S_rRNA         |
| DMR3:14111101 | 3 | 14111101 | 3600  | 3  | 1.64E-12 | 95  | 2.6 |                 |
| DMR3:14143001 | 3 | 14143001 | 1700  | 2  | 2.60E-13 | 61  | 3.5 |                 |
| DMR3:14175401 | 3 | 14175401 | 2800  | 3  | 5.31E-11 | 32  | 1.1 | lppr2a          |
| DMR3:14217601 | 3 | 14217601 | 2600  | 5  | 5.87E-33 | 56  | 2.1 | lppr2a          |
| DMR3:14257601 | 3 | 14257601 | 5300  | 3  | 6.85E-14 | 131 | 2.4 | tmem56b         |
| DMR3:16535601 | 3 | 16535601 | 2200  | 2  | 8.16E-10 | 67  | 3   |                 |
| DMR3:17045901 | 3 | 17045901 | 1100  | 2  | 2.44E-11 | 16  | 1.4 |                 |
| DMR3:21315301 | 3 | 21315301 | 3400  | 2  | 1.03E-11 | 37  | 1   | ch73-54a8.2     |
| DMR3:28391001 | 3 | 28391001 | 500   | 2  | 4.17E-12 | 18  | 3.6 | 12-Sep          |
| DMR3:28587101 | 3 | 28587101 | 1700  | 2  | 1.22E-12 | 16  | 0.9 | gsg1l           |
| DMR3:30394101 | 3 | 30394101 | 5500  | 3  | 1.70E-09 | 124 | 2.2 | syt3            |
| DMR3:30941901 | 3 | 30941901 | 1400  | 2  | 1.39E-17 | 60  | 4.2 | tceb2           |
| DMR3:31137001 | 3 | 31137001 | 1300  | 5  | 1.73E-10 | 38  | 2.9 |                 |
| DMR3:31306901 | 3 | 31306901 | 1700  | 2  | 1.34E-12 | 17  | 1   |                 |
| DMR3:31850101 | 3 | 31850101 | 800   | 2  | 1.06E-11 | 16  | 2   | kcnc3a          |
| DMR3:59892001 | 3 | 59892001 | 1900  | 2  | 1.85E-10 | 94  | 4.9 | xylyt2          |
| DMR4:1530701  | 4 | 1530701  | 2600  | 2  | 1.80E-11 | 82  | 3.1 |                 |
| DMR4:3494601  | 4 | 3494601  | 1700  | 2  | 1.33E-08 | 8   | 0.4 | grm8a           |
| DMR4:4873301  | 4 | 4873301  | 1000  | 5  | 3.05E-11 | 43  | 4.3 | ptprz1b         |
| DMR4:7031501  | 4 | 7031501  | 2200  | 3  | 3.71E-10 | 28  | 1.2 |                 |
| DMR4:9689801  | 4 | 9689801  | 1500  | 3  | 1.26E-13 | 8   | 0.5 |                 |
| DMR4:29125001 | 4 | 29125001 | 7400  | 8  | 6.84E-21 | 246 | 3.3 | fb11h05         |
| DMR4:29687601 | 4 | 29687601 | 9100  | 14 | 2.22E-17 | 120 | 1.3 | BX248122.1      |
| DMR4:30277801 | 4 | 30277801 | 2300  | 3  | 9.48E-11 | 56  | 2.4 | RNH1 (6 of 55)  |
| DMR4:33105801 | 4 | 33105801 | 3600  | 2  | 1.95E-08 | 161 | 4.4 |                 |
| DMR4:39324201 | 4 | 39324201 | 4700  | 4  | 2.79E-10 | 109 | 2.3 | RNH1 (45 of 55) |
| DMR4:40592001 | 4 | 40592001 | 4300  | 8  | 1.25E-19 | 88  | 2   |                 |
| DMR4:44703501 | 4 | 44703501 | 700   | 2  | 5.16E-13 | 20  | 2.8 | dkey-256i11.2   |
| DMR4:51339201 | 4 | 51339201 | 2800  | 3  | 6.93E-11 | 144 | 5.1 | dkey-250k10.1   |
| DMR4:51348201 | 4 | 51348201 | 700   | 2  | 4.42E-10 | 16  | 2.2 | dkey-250k10.1   |
| DMR4:51909501 | 4 | 51909501 | 3300  | 2  | 1.72E-08 | 105 | 3.1 |                 |
| DMR4:52940101 | 4 | 52940101 | 6200  | 17 | 9.71E-19 | 258 | 4.1 | dkey-56m15.9    |
| DMR4:52956001 | 4 | 52956001 | 2900  | 9  | 8.77E-27 | 64  | 2.2 | dkey-56m15.9    |
| DMR4:53883901 | 4 | 53883901 | 7500  | 3  | 3.51E-08 | 292 | 3.8 |                 |
| DMR4:63845601 | 4 | 63845601 | 2400  | 2  | 1.51E-11 | 55  | 2.2 |                 |
| DMR4:67286701 | 4 | 67286701 | 5200  | 5  | 7.51E-19 | 86  | 1.6 | ch211-209j12.4  |
| DMR4:69395401 | 4 | 69395401 | 3300  | 3  | 9.10E-09 | 58  | 1.7 | ch211-76m11.3   |
| DMR4:70554901 | 4 | 70554901 | 2200  | 3  | 1.68E-16 | 107 | 4.8 |                 |
| DMR4:70713201 | 4 | 70713201 | 1900  | 2  | 9.72E-13 | 40  | 2.1 | ftr64           |
| DMR4:70945701 | 4 | 70945701 | 6400  | 4  | 6.57E-09 | 176 | 2.7 | CABZ01054394.4  |
| DMR4:72017901 | 4 | 72017901 | 2400  | 8  | 1.62E-20 | 73  | 3   |                 |
| DMR4:72074701 | 4 | 72074701 | 3400  | 7  | 1.19E-13 | 123 | 3.6 | BX855614.4      |

|               |   |          |       |    |          |     |     |                          |
|---------------|---|----------|-------|----|----------|-----|-----|--------------------------|
| DMR4:72107201 | 4 | 72107201 | 6500  | 7  | 8.44E-14 | 552 | 8.4 | 171551                   |
| DMR4:72489901 | 4 | 72489901 | 4400  | 2  | 3.62E-10 | 147 | 3.3 |                          |
| DMR4:72738501 | 4 | 72738501 | 2500  | 2  | 8.41E-13 | 168 | 6.7 |                          |
| DMR4:72819201 | 4 | 72819201 | 8300  | 3  | 1.73E-11 | 306 | 3.6 | ptprb                    |
| DMR4:72841601 | 4 | 72841601 | 2200  | 3  | 7.08E-13 | 119 | 5.4 | ptprb                    |
| DMR4:72895901 | 4 | 72895901 | 2600  | 13 | 1.17E-23 | 137 | 5.2 | ptprb                    |
| DMR4:73006401 | 4 | 73006401 | 5600  | 3  | 2.75E-09 | 188 | 3.3 |                          |
| DMR4:73033001 | 4 | 73033001 | 8500  | 3  | 9.47E-12 | 304 | 3.5 |                          |
| DMR4:73098601 | 4 | 73098601 | 3900  | 17 | 4.62E-20 | 116 | 2.9 |                          |
| DMR4:74120701 | 4 | 74120701 | 1400  | 2  | 2.34E-11 | 12  | 0.8 | dkey-261j11.2            |
| DMR4:74129901 | 4 | 74129901 | 8700  | 3  | 1.29E-15 | 403 | 4.6 | dkey-261j11.2            |
| DMR4:74143101 | 4 | 74143101 | 1500  | 3  | 1.83E-18 | 25  | 1.6 | dkey-261j11.2            |
| DMR4:75006601 | 4 | 75006601 | 1200  | 2  | 6.20E-14 | 43  | 3.5 | ms4a17a.11               |
| DMR4:75342001 | 4 | 75342001 | 1600  | 4  | 5.53E-13 | 47  | 2.9 | NA                       |
| DMR4:75579501 | 4 | 75579501 | 1800  | 3  | 4.47E-12 | 133 | 7.3 | CU467646.4               |
| DMR4:76173401 | 4 | 76173401 | 3800  | 2  | 3.62E-12 | 82  | 2.1 |                          |
| DMR5:2396701  | 5 | 2396701  | 2100  | 3  | 7.98E-12 | 26  | 1.2 |                          |
| DMR5:3638301  | 5 | 3638301  | 1100  | 2  | 1.87E-10 | 15  | 1.3 | MYO19                    |
| DMR5:3967401  | 5 | 3967401  | 23700 | 4  | 1.19E-08 | 648 | 2.7 | prdx4                    |
| DMR5:4188901  | 5 | 4188901  | 5300  | 4  | 1.69E-14 | 81  | 1.5 | PLA2G4C (3 of 4)         |
| DMR5:4250601  | 5 | 4250601  | 8400  | 13 | 1.32E-13 | 154 | 1.8 | FO834898.1               |
| DMR5:4281001  | 5 | 4281001  | 3000  | 3  | 1.10E-11 | 44  | 1.4 | FO834898.1               |
| DMR5:4291501  | 5 | 4291501  | 2700  | 4  | 2.16E-13 | 88  | 3.2 | FO834898.1               |
| DMR5:4347901  | 5 | 4347901  | 2900  | 2  | 2.39E-14 | 81  | 2.7 |                          |
| DMR5:4394001  | 5 | 4394001  | 10200 | 6  | 4.93E-13 | 169 | 1.6 | angptl2a                 |
| DMR5:4405201  | 5 | 4405201  | 1800  | 4  | 2.33E-12 | 45  | 2.5 |                          |
| DMR5:4432001  | 5 | 4432001  | 2200  | 3  | 8.92E-22 | 59  | 2.6 |                          |
| DMR5:5272901  | 5 | 5272901  | 2500  | 5  | 8.36E-17 | 22  | 0.8 | TNC (2 of 2)             |
| DMR5:5466301  | 5 | 5466301  | 9600  | 14 | 2.54E-11 | 138 | 1.4 |                          |
| DMR5:5631701  | 5 | 5631701  | 800   | 2  | 7.58E-13 | 28  | 3.5 |                          |
| DMR5:5986201  | 5 | 5986201  | 2000  | 2  | 2.76E-09 | 54  | 2.7 | tnks1bp1                 |
| DMR5:6586901  | 5 | 6586901  | 900   | 2  | 2.23E-10 | 10  | 1.1 |                          |
| DMR5:6640501  | 5 | 6640501  | 600   | 2  | 9.48E-09 | 31  | 5.1 |                          |
| DMR5:6976301  | 5 | 6976301  | 1000  | 2  | 1.85E-12 | 28  | 2.8 | UNC5C (2 of 2)           |
| DMR5:7035501  | 5 | 7035501  | 500   | 2  | 4.40E-08 | 13  | 2.6 | bmpr1ba                  |
| DMR5:7069901  | 5 | 7069901  | 4200  | 2  | 2.20E-09 | 109 | 2.5 | ANGPTL2 (3 of 3);bmpr1ba |
| DMR5:7178001  | 5 | 7178001  | 4300  | 3  | 5.13E-14 | 62  | 1.4 | bmpr1ba                  |
| DMR5:8967401  | 5 | 8967401  | 2800  | 4  | 2.31E-13 | 59  | 2.1 | gak                      |
| DMR5:8971701  | 5 | 8971701  | 1000  | 2  | 3.19E-09 | 33  | 3.3 | gak                      |
| DMR5:8995601  | 5 | 8995601  | 4800  | 3  | 3.11E-09 | 118 | 2.4 | gak                      |
| DMR5:10214801 | 5 | 10214801 | 2700  | 3  | 5.33E-12 | 73  | 2.7 |                          |
| DMR5:10671601 | 5 | 10671601 | 4300  | 4  | 1.54E-12 | 107 | 2.4 |                          |
| DMR5:11084501 | 5 | 11084501 | 2900  | 2  | 1.38E-09 | 49  | 1.6 |                          |
| DMR5:13216101 | 5 | 13216101 | 3000  | 2  | 6.19E-09 | 98  | 3.2 | mxd1                     |
| DMR5:13667801 | 5 | 13667801 | 7300  | 8  | 6.26E-11 | 218 | 2.9 | npffr1l2                 |
| DMR5:17311701 | 5 | 17311701 | 700   | 2  | 3.37E-11 | 23  | 3.2 |                          |
| DMR5:19369301 | 5 | 19369301 | 1600  | 4  | 1.00E-14 | 34  | 2.1 | tchp                     |
| DMR5:19830401 | 5 | 19830401 | 8500  | 2  | 1.36E-09 | 209 | 2.4 | coro1ca                  |
| DMR5:34749201 | 5 | 34749201 | 5700  | 2  | 8.45E-12 | 236 | 4.1 |                          |
| DMR5:59962201 | 5 | 59962201 | 1000  | 4  | 3.42E-16 | 17  | 1.7 | tmem132e                 |
| DMR5:60584201 | 5 | 60584201 | 2300  | 2  | 2.80E-20 | 28  | 1.2 | doc2b                    |
| DMR5:60588801 | 5 | 60588801 | 1700  | 2  | 2.89E-10 | 54  | 3.1 | doc2b                    |
| DMR5:63572301 | 5 | 63572301 | 3900  | 3  | 1.46E-08 | 91  | 2.3 |                          |
| DMR5:63864401 | 5 | 63864401 | 4100  | 6  | 1.81E-11 | 32  | 0.7 |                          |
| DMR5:64042001 | 5 | 64042001 | 2000  | 2  | 3.39E-10 | 24  | 1.2 |                          |

|               |   |          |       |    |          |     |     |                 |
|---------------|---|----------|-------|----|----------|-----|-----|-----------------|
| DMR5:64095201 | 5 | 64095201 | 3100  | 2  | 8.80E-09 | 77  | 2.4 |                 |
| DMR5:64357401 | 5 | 64357401 | 2400  | 2  | 1.02E-14 | 55  | 2.2 | pmpca           |
| DMR5:64364101 | 5 | 64364101 | 900   | 3  | 1.61E-14 | 43  | 4.7 | pmpca           |
| DMR5:64414401 | 5 | 64414401 | 1900  | 8  | 1.25E-40 | 22  | 1.1 |                 |
| DMR5:64654101 | 5 | 64654101 | 900   | 2  | 9.44E-10 | 27  | 3   |                 |
| DMR5:64725501 | 5 | 64725501 | 1900  | 2  | 1.81E-11 | 37  | 1.9 |                 |
| DMR5:66964801 | 5 | 66964801 | 1500  | 3  | 1.46E-10 | 26  | 1.7 | zbtb20          |
| DMR5:67041601 | 5 | 67041601 | 11900 | 6  | 6.19E-13 | 245 | 2   | arhgap31        |
| DMR5:67061901 | 5 | 67061901 | 1000  | 3  | 5.01E-10 | 45  | 4.5 | b4galt4         |
| DMR5:67190401 | 5 | 67190401 | 600   | 2  | 3.61E-18 | 25  | 4.1 |                 |
| DMR5:67246001 | 5 | 67246001 | 900   | 2  | 2.76E-10 | 36  | 4   |                 |
| DMR5:67301801 | 5 | 67301801 | 800   | 2  | 2.62E-10 | 27  | 3.3 | gtf3aa          |
| DMR5:67401401 | 5 | 67401401 | 2400  | 4  | 1.71E-13 | 71  | 2.9 | slc25a11        |
| DMR5:67408901 | 5 | 67408901 | 3300  | 2  | 8.35E-20 | 81  | 2.4 | slc25a11        |
| DMR5:67983101 | 5 | 67983101 | 1700  | 9  | 4.47E-18 | 61  | 3.5 |                 |
| DMR5:68928901 | 5 | 68928901 | 1000  | 2  | 3.72E-12 | 23  | 2.3 |                 |
| DMR5:69209001 | 5 | 69209001 | 2200  | 2  | 1.28E-09 | 24  | 1   | ch211-154e10.1  |
| DMR5:69439401 | 5 | 69439401 | 3100  | 8  | 1.58E-12 | 16  | 0.5 |                 |
| DMR5:69910101 | 5 | 69910101 | 3800  | 2  | 2.41E-09 | 29  | 0.7 |                 |
| DMR5:70252601 | 5 | 70252601 | 1000  | 2  | 8.58E-12 | 34  | 3.4 |                 |
| DMR5:70272501 | 5 | 70272501 | 600   | 3  | 2.68E-23 | 35  | 5.8 |                 |
| DMR5:70285901 | 5 | 70285901 | 6500  | 5  | 1.22E-22 | 106 | 1.6 |                 |
| DMR5:70331501 | 5 | 70331501 | 1100  | 2  | 1.18E-08 | 22  | 2   |                 |
| DMR5:70393901 | 5 | 70393901 | 8200  | 5  | 1.02E-27 | 220 | 2.6 |                 |
| DMR5:70428201 | 5 | 70428201 | 2800  | 3  | 3.52E-12 | 11  | 0.3 |                 |
| DMR5:70893201 | 5 | 70893201 | 1700  | 2  | 3.35E-13 | 18  | 1   |                 |
| DMR5:70970501 | 5 | 70970501 | 3600  | 3  | 9.13E-14 | 76  | 2.1 | gpsm1b          |
| DMR5:71172001 | 5 | 71172001 | 500   | 2  | 1.61E-10 | 7   | 1.4 | nup214          |
| DMR5:71201101 | 5 | 71201101 | 2800  | 2  | 2.11E-12 | 54  | 1.9 | fam78ab         |
| DMR5:71402601 | 5 | 71402601 | 4800  | 3  | 1.32E-21 | 83  | 1.7 |                 |
| DMR5:71456001 | 5 | 71456001 | 5000  | 3  | 3.91E-14 | 162 | 3.2 | ddx54           |
| DMR5:71582301 | 5 | 71582301 | 5400  | 2  | 2.52E-16 | 128 | 2.3 | ddx54           |
| DMR6:1312501  | 6 | 1312501  | 3200  | 3  | 2.83E-10 | 90  | 2.8 |                 |
| DMR6:9689001  | 6 | 9689001  | 1300  | 3  | 1.93E-08 | 50  | 3.8 |                 |
| DMR6:36138801 | 6 | 36138801 | 900   | 3  | 1.52E-09 | 48  | 5.3 | ch211-205j18.1  |
| DMR6:37840601 | 6 | 37840601 | 2100  | 3  | 3.76E-10 | 28  | 1.3 | herc2           |
| DMR6:41535401 | 6 | 41535401 | 1100  | 4  | 1.63E-14 | 21  | 1.9 | hemk1           |
| DMR6:48370601 | 6 | 48370601 | 700   | 5  | 6.12E-29 | 20  | 2.8 | mov10a          |
| DMR6:50732101 | 6 | 50732101 | 7200  | 2  | 7.95E-09 | 156 | 2.1 |                 |
| DMR6:59227701 | 6 | 59227701 | 3900  | 4  | 9.38E-19 | 122 | 3.1 | fam210b;shmt2   |
| DMR6:59314501 | 6 | 59314501 | 5800  | 5  | 2.61E-15 | 54  | 0.9 | fam210b         |
| DMR6:59329201 | 6 | 59329201 | 4400  | 3  | 2.14E-12 | 134 | 3   | fam210b         |
| DMR6:59339901 | 6 | 59339901 | 7800  | 3  | 3.37E-18 | 150 | 1.9 | fam210b         |
| DMR6:59349401 | 6 | 59349401 | 4900  | 5  | 1.68E-24 | 92  | 1.8 | fam210b         |
| DMR6:59740801 | 6 | 59740801 | 5200  | 7  | 1.44E-39 | 163 | 3.1 | NUFIP1          |
| DMR6:59951801 | 6 | 59951801 | 6700  | 27 | 2.00E-21 | 196 | 2.9 | pmepa1;kdm6al   |
| DMR6:60175401 | 6 | 60175401 | 6400  | 20 | 1.54E-56 | 156 | 2.4 |                 |
| DMR6:60185901 | 6 | 60185901 | 1200  | 4  | 1.29E-17 | 97  | 8   |                 |
| DMR6:60224101 | 6 | 60224101 | 2100  | 2  | 5.77E-15 | 53  | 2.5 |                 |
| DMR6:60227601 | 6 | 60227601 | 4500  | 3  | 1.90E-15 | 131 | 2.9 |                 |
| DMR6:60258501 | 6 | 60258501 | 2300  | 2  | 1.27E-10 | 53  | 2.3 |                 |
| DMR7:55101    | 7 | 55101    | 1800  | 4  | 1.27E-22 | 37  | 2   |                 |
| DMR7:2052101  | 7 | 2052101  | 9400  | 4  | 4.91E-13 | 254 | 2.7 |                 |
| DMR7:3622201  | 7 | 3622201  | 2100  | 3  | 8.66E-12 | 54  | 2.5 | ch211-282j17.11 |
| DMR7:4188701  | 7 | 4188701  | 2000  | 2  | 2.00E-08 | 86  | 4.3 |                 |

|               |   |          |      |    |          |     |     |                |
|---------------|---|----------|------|----|----------|-----|-----|----------------|
| DMR7:10092301 | 7 | 10092301 | 4600 | 2  | 3.27E-10 | 62  | 1.3 |                |
| DMR7:10141901 | 7 | 10141901 | 2200 | 2  | 1.26E-11 | 49  | 2.2 |                |
| DMR7:25119701 | 7 | 25119701 | 4200 | 5  | 2.95E-15 | 145 | 3.4 |                |
| DMR7:42584401 | 7 | 42584401 | 1300 | 2  | 4.70E-13 | 54  | 4.1 |                |
| DMR7:47553201 | 7 | 47553201 | 2900 | 2  | 1.47E-17 | 24  | 0.8 | ch211-186j3.6  |
| DMR7:51293801 | 7 | 51293801 | 1600 | 4  | 2.85E-18 | 37  | 2.3 |                |
| DMR7:53854501 | 7 | 53854501 | 1800 | 2  | 2.36E-08 | 39  | 2.1 | csnk1g1        |
| DMR7:53972301 | 7 | 53972301 | 1800 | 2  | 1.25E-08 | 42  | 2.3 | pacsin3        |
| DMR7:54351401 | 7 | 54351401 | 2700 | 8  | 8.01E-14 | 67  | 2.4 | fgf4           |
| DMR7:56172201 | 7 | 56172201 | 3400 | 4  | 8.53E-14 | 40  | 1.1 | sult5a1;ist1   |
| DMR7:59082601 | 7 | 59082601 | 2300 | 2  | 2.68E-08 | 79  | 3.4 | SEMA4F         |
| DMR7:59099201 | 7 | 59099201 | 3100 | 2  | 5.48E-10 | 53  | 1.7 | SEMA4F         |
| DMR7:59417801 | 7 | 59417801 | 7100 | 4  | 4.01E-10 | 259 | 3.6 |                |
| DMR7:60200401 | 7 | 60200401 | 8400 | 3  | 1.23E-09 | 138 | 1.6 | pcxb           |
| DMR7:60330301 | 7 | 60330301 | 5500 | 2  | 1.80E-08 | 102 | 1.8 | pcxb           |
| DMR7:60561601 | 7 | 60561601 | 5900 | 19 | 4.14E-12 | 137 | 2.3 |                |
| DMR7:61403301 | 7 | 61403301 | 1800 | 3  | 6.39E-12 | 31  | 1.7 |                |
| DMR7:62898001 | 7 | 62898001 | 2900 | 2  | 1.49E-13 | 60  | 2   |                |
| DMR7:62988901 | 7 | 62988901 | 6100 | 3  | 6.33E-19 | 143 | 2.3 |                |
| DMR7:64599101 | 7 | 64599101 | 1700 | 2  | 1.20E-08 | 81  | 4.7 | MMP15 (1 of 2) |
| DMR7:66282101 | 7 | 66282101 | 5300 | 4  | 2.84E-20 | 107 | 2   |                |
| DMR7:66368601 | 7 | 66368601 | 1600 | 3  | 4.46E-10 | 47  | 2.9 |                |
| DMR8:3112301  | 8 | 3112301  | 3300 | 4  | 1.16E-09 | 59  | 1.7 |                |
| DMR8:26093201 | 8 | 26093201 | 1100 | 6  | 5.53E-20 | 42  | 3.8 |                |
| DMR8:30671801 | 8 | 30671801 | 2600 | 2  | 7.14E-10 | 100 | 3.8 | adora2aa       |
| DMR8:30711401 | 8 | 30711401 | 1700 | 3  | 3.02E-10 | 43  | 2.5 | upb1           |
| DMR8:41765001 | 8 | 41765001 | 1600 | 2  | 6.96E-09 | 30  | 1.8 |                |
| DMR8:44073801 | 8 | 44073801 | 800  | 3  | 6.10E-13 | 14  | 1.7 |                |
| DMR8:44636501 | 8 | 44636501 | 1700 | 2  | 1.04E-12 | 43  | 2.5 | grk5l          |
| DMR8:45429401 | 8 | 45429401 | 800  | 4  | 9.53E-15 | 25  | 3.1 |                |
| DMR8:46092501 | 8 | 46092501 | 5400 | 2  | 5.82E-14 | 177 | 3.2 | mtor           |
| DMR8:46244801 | 8 | 46244801 | 4700 | 6  | 1.77E-14 | 122 | 2.5 | mtor           |
| DMR8:46527701 | 8 | 46527701 | 8900 | 14 | 6.87E-15 | 240 | 2.6 | ch211-196g2.7  |
| DMR8:47333201 | 8 | 47333201 | 1200 | 2  | 2.44E-10 | 33  | 2.7 | pex10          |
| DMR8:47975401 | 8 | 47975401 | 4600 | 9  | 8.64E-14 | 131 | 2.8 |                |
| DMR8:48032701 | 8 | 48032701 | 1200 | 3  | 2.28E-13 | 55  | 4.5 |                |
| DMR8:48309801 | 8 | 48309801 | 700  | 2  | 1.51E-08 | 18  | 2.5 | PRDM16         |
| DMR8:48794601 | 8 | 48794601 | 4400 | 3  | 4.02E-11 | 78  | 1.7 | ch211-278p7.5  |
| DMR8:48902001 | 8 | 48902001 | 7500 | 6  | 5.78E-17 | 193 | 2.5 | tp73           |
| DMR8:48999401 | 8 | 48999401 | 6000 | 3  | 2.39E-13 | 122 | 2   | aak1a          |
| DMR8:49121501 | 8 | 49121501 | 6500 | 5  | 2.39E-09 | 138 | 2.1 | GOLM1          |
| DMR8:53196501 | 8 | 53196501 | 3500 | 3  | 4.30E-09 | 201 | 5.7 | cacna1db       |
| DMR9:4770701  | 9 | 4770701  | 1100 | 4  | 1.52E-14 | 3   | 0.2 | fmnl2a         |
| DMR9:5760001  | 9 | 5760001  | 4100 | 2  | 2.20E-10 | 146 | 3.5 |                |
| DMR9:8577701  | 9 | 8577701  | 1700 | 4  | 4.72E-10 | 35  | 2   |                |
| DMR9:11792301 | 9 | 11792301 | 5300 | 2  | 5.93E-10 | 105 | 1.9 |                |
| DMR9:11886401 | 9 | 11886401 | 3900 | 4  | 2.71E-10 | 115 | 2.9 |                |
| DMR9:11931501 | 9 | 11931501 | 600  | 2  | 1.00E-08 | 11  | 1.8 |                |
| DMR9:19846401 | 9 | 19846401 | 6700 | 2  | 1.77E-13 | 282 | 4.2 | pdxka          |
| DMR9:19854101 | 9 | 19854101 | 3400 | 4  | 8.67E-13 | 111 | 3.2 |                |
| DMR9:19862601 | 9 | 19862601 | 7400 | 9  | 1.36E-12 | 268 | 3.6 |                |
| DMR9:19903201 | 9 | 19903201 | 5500 | 2  | 1.33E-11 | 138 | 2.5 | ch211-141e20.5 |
| DMR9:19936801 | 9 | 19936801 | 5400 | 3  | 4.01E-15 | 121 | 2.2 | ch211-141e20.6 |
| DMR9:20056001 | 9 | 20056001 | 7400 | 3  | 7.44E-12 | 286 | 3.8 |                |
| DMR9:20078301 | 9 | 20078301 | 6400 | 2  | 5.30E-17 | 142 | 2.2 |                |

|                |    |          |       |    |          |     |     |                 |
|----------------|----|----------|-------|----|----------|-----|-----|-----------------|
| DMR9:20125601  | 9  | 20125601 | 3500  | 6  | 1.90E-10 | 65  | 1.8 |                 |
| DMR9:23333701  | 9  | 23333701 | 4900  | 2  | 1.00E-08 | 81  | 1.6 | lypd6b          |
| DMR9:23490701  | 9  | 23490701 | 6300  | 5  | 1.17E-08 | 349 | 5.5 | tmem163a        |
| DMR9:24526901  | 9  | 24526901 | 1800  | 5  | 7.89E-21 | 107 | 5.9 | tmeff2a         |
| DMR9:24736901  | 9  | 24736901 | 5700  | 2  | 8.04E-10 | 135 | 2.3 | 5S_rRNA         |
| DMR9:26576901  | 9  | 26576901 | 2800  | 2  | 4.37E-11 | 36  | 1.2 | dkey-111i23.1   |
| DMR9:43671001  | 9  | 43671001 | 3100  | 2  | 4.13E-09 | 36  | 1.1 | znf385b         |
| DMR9:43901601  | 9  | 43901601 | 4200  | 2  | 3.10E-10 | 81  | 1.9 |                 |
| DMR9:49275001  | 9  | 49275001 | 2400  | 3  | 2.66E-15 | 111 | 4.6 |                 |
| DMR9:49914201  | 9  | 49914201 | 1700  | 2  | 2.79E-09 | 38  | 2.2 |                 |
| DMR9:50157501  | 9  | 50157501 | 1800  | 4  | 7.43E-13 | 108 | 6   | ttc21b          |
| DMR9:50379601  | 9  | 50379601 | 6300  | 5  | 2.16E-12 | 195 | 3   | COBLL1 (2 of 2) |
| DMR9:50763401  | 9  | 50763401 | 7300  | 13 | 2.33E-17 | 145 | 1.9 |                 |
| DMR9:51915301  | 9  | 51915301 | 5100  | 5  | 1.58E-10 | 135 | 2.6 | NA              |
| DMR9:52335301  | 9  | 52335301 | 2000  | 2  | 1.06E-09 | 75  | 3.7 |                 |
| DMR9:52799301  | 9  | 52799301 | 900   | 4  | 4.49E-14 | 3   | 0.3 | nme8            |
| DMR9:52892901  | 9  | 52892901 | 2200  | 2  | 1.36E-09 | 35  | 1.5 | nme8;smarcal1   |
| DMR9:54539001  | 9  | 54539001 | 3700  | 5  | 1.54E-15 | 74  | 2   | frmpd4          |
| DMR9:55317901  | 9  | 55317901 | 400   | 2  | 1.48E-10 | 8   | 2   |                 |
| DMR9:55330401  | 9  | 55330401 | 2100  | 2  | 9.14E-15 | 37  | 1.7 |                 |
| DMR9:55347801  | 9  | 55347801 | 4900  | 2  | 3.72E-18 | 82  | 1.6 | glra2           |
| DMR9:55370401  | 9  | 55370401 | 4500  | 3  | 1.33E-10 | 142 | 3.1 | fancb           |
| DMR9:56011201  | 9  | 56011201 | 7100  | 2  | 7.52E-09 | 75  | 1   | edar            |
| DMR9:56080101  | 9  | 56080101 | 2300  | 10 | 5.67E-14 | 26  | 1.1 |                 |
| DMR10:1817601  | 10 | 1817601  | 5100  | 2  | 1.30E-12 | 169 | 3.3 | apc             |
| DMR10:3196401  | 10 | 3196401  | 800   | 2  | 2.48E-10 | 20  | 2.5 | pi4kaa          |
| DMR10:3220601  | 10 | 3220601  | 1300  | 2  | 5.01E-15 | 56  | 4.3 | pi4kaa          |
| DMR10:3224801  | 10 | 3224801  | 2900  | 3  | 5.73E-17 | 60  | 2   | pi4kaa          |
| DMR10:3261601  | 10 | 3261601  | 2100  | 3  | 1.88E-14 | 40  | 1.9 |                 |
| DMR10:3265501  | 10 | 3265501  | 2000  | 2  | 3.98E-09 | 106 | 5.3 |                 |
| DMR10:3286701  | 10 | 3286701  | 2200  | 3  | 1.02E-14 | 100 | 4.5 | slc25a1b        |
| DMR10:4190701  | 10 | 4190701  | 1100  | 4  | 2.01E-29 | 49  | 4.4 |                 |
| DMR10:4341701  | 10 | 4341701  | 3500  | 4  | 6.12E-21 | 150 | 4.2 |                 |
| DMR10:4381801  | 10 | 4381801  | 1000  | 2  | 9.58E-10 | 40  | 4   |                 |
| DMR10:4441901  | 10 | 4441901  | 2000  | 3  | 9.31E-10 | 76  | 3.8 |                 |
| DMR10:4491001  | 10 | 4491001  | 3700  | 3  | 1.62E-13 | 64  | 1.7 |                 |
| DMR10:7154301  | 10 | 7154301  | 1900  | 2  | 5.12E-29 | 57  | 3   | psd3l           |
| DMR10:7280501  | 10 | 7280501  | 2700  | 2  | 3.47E-11 | 39  | 1.4 |                 |
| DMR10:7659201  | 10 | 7659201  | 2900  | 5  | 1.24E-21 | 70  | 2.4 |                 |
| DMR10:7682801  | 10 | 7682801  | 3300  | 4  | 1.30E-09 | 143 | 4.3 |                 |
| DMR10:7807601  | 10 | 7807601  | 500   | 2  | 8.38E-10 | 14  | 2.8 |                 |
| DMR10:7963401  | 10 | 7963401  | 5200  | 2  | 5.73E-14 | 112 | 2.1 | osbp2           |
| DMR10:8034801  | 10 | 8034801  | 1300  | 2  | 1.07E-08 | 94  | 7.2 | atp6v0a2a       |
| DMR10:8160001  | 10 | 8160001  | 3600  | 3  | 2.31E-14 | 76  | 2.1 | pstpip2         |
| DMR10:8217601  | 10 | 8217601  | 1800  | 3  | 7.72E-13 | 58  | 3.2 | DHX29           |
| DMR10:10460601 | 10 | 10460601 | 4500  | 5  | 3.46E-09 | 104 | 2.3 | sardh           |
| DMR10:10471301 | 10 | 10471301 | 1600  | 3  | 2.21E-12 | 62  | 3.8 | sardh           |
| DMR10:10883401 | 10 | 10883401 | 1400  | 2  | 6.21E-12 | 31  | 2.2 |                 |
| DMR10:14266501 | 10 | 14266501 | 6200  | 4  | 1.19E-16 | 147 | 2.3 |                 |
| DMR10:14860501 | 10 | 14860501 | 3600  | 5  | 4.86E-17 | 147 | 4   |                 |
| DMR10:15026401 | 10 | 15026401 | 1200  | 3  | 6.00E-13 | 18  | 1.5 | dkey-88l16.3    |
| DMR10:15765901 | 10 | 15765901 | 7200  | 2  | 7.48E-10 | 196 | 2.7 |                 |
| DMR10:15787501 | 10 | 15787501 | 13100 | 4  | 5.03E-12 | 321 | 2.4 | BX629350.3      |
| DMR10:17582401 | 10 | 17582401 | 3100  | 2  | 1.65E-09 | 68  | 2.1 | dkey-76p7.7     |
| DMR10:17738101 | 10 | 17738101 | 3900  | 2  | 7.78E-11 | 57  | 1.4 |                 |

|                |    |          |       |    |          |     |     |                  |
|----------------|----|----------|-------|----|----------|-----|-----|------------------|
| DMR10:18544001 | 10 | 18544001 | 1800  | 2  | 5.75E-18 | 14  | 0.7 |                  |
| DMR10:21842801 | 10 | 21842801 | 1400  | 3  | 8.10E-11 | 33  | 2.3 | pcdh1gb2;pcdh1g3 |
| DMR10:22833001 | 10 | 22833001 | 1200  | 2  | 1.53E-08 | 16  | 1.3 | pcolcea          |
| DMR10:22979201 | 10 | 22979201 | 1300  | 3  | 5.96E-11 | 17  | 1.3 |                  |
| DMR10:23082301 | 10 | 23082301 | 2100  | 2  | 1.59E-11 | 64  | 3   |                  |
| DMR10:23455601 | 10 | 23455601 | 5800  | 3  | 3.74E-10 | 199 | 3.4 |                  |
| DMR10:25871301 | 10 | 25871301 | 600   | 2  | 5.00E-12 | 21  | 3.5 | trpc4a           |
| DMR10:26248701 | 10 | 26248701 | 1500  | 2  | 9.26E-09 | 46  | 3   | arfip2b          |
| DMR10:26899601 | 10 | 26899601 | 1200  | 3  | 1.70E-10 | 21  | 1.7 |                  |
| DMR10:27192001 | 10 | 27192001 | 4400  | 4  | 9.34E-11 | 95  | 2.1 | cxadr            |
| DMR10:27824201 | 10 | 27824201 | 6700  | 2  | 3.56E-08 | 112 | 1.6 |                  |
| DMR10:28006501 | 10 | 28006501 | 2900  | 4  | 1.24E-13 | 80  | 2.7 |                  |
| DMR10:29032301 | 10 | 29032301 | 1500  | 3  | 1.51E-09 | 39  | 2.6 |                  |
| DMR10:32594301 | 10 | 32594301 | 800   | 2  | 1.85E-12 | 1   | 0.1 | mogat2           |
| DMR10:32607101 | 10 | 32607101 | 2900  | 5  | 4.23E-11 | 72  | 2.4 | mogat2           |
| DMR10:32665001 | 10 | 32665001 | 700   | 2  | 1.42E-09 | 13  | 1.8 | mogat2           |
| DMR10:33225101 | 10 | 33225101 | 2900  | 4  | 2.24E-16 | 50  | 1.7 | myl10            |
| DMR10:34645101 | 10 | 34645101 | 1900  | 2  | 5.40E-09 | 29  | 1.5 | nbeaa            |
| DMR10:36032901 | 10 | 36032901 | 4000  | 6  | 1.93E-11 | 28  | 0.7 |                  |
| DMR10:36162701 | 10 | 36162701 | 500   | 2  | 2.64E-09 | 11  | 2.2 |                  |
| DMR10:37363101 | 10 | 37363101 | 1200  | 3  | 1.95E-25 | 36  | 3   | nf1b             |
| DMR10:37896601 | 10 | 37896601 | 1900  | 4  | 4.86E-15 | 30  | 1.5 |                  |
| DMR10:38110701 | 10 | 38110701 | 7300  | 3  | 5.18E-09 | 191 | 2.6 |                  |
| DMR10:38684701 | 10 | 38684701 | 5000  | 3  | 7.27E-12 | 187 | 3.7 |                  |
| DMR10:38708701 | 10 | 38708701 | 3000  | 2  | 4.25E-09 | 59  | 1.9 | mmp30            |
| DMR10:38792201 | 10 | 38792201 | 1100  | 2  | 4.64E-10 | 15  | 1.3 |                  |
| DMR10:39732901 | 10 | 39732901 | 1600  | 2  | 4.16E-09 | 38  | 2.3 | kirrel3a         |
| DMR10:40062301 | 10 | 40062301 | 4200  | 3  | 1.39E-10 | 81  | 1.9 | CLMP             |
| DMR10:41094801 | 10 | 41094801 | 700   | 2  | 8.68E-19 | 56  | 8   | antxr1b          |
| DMR10:41342901 | 10 | 41342901 | 5100  | 5  | 1.70E-14 | 135 | 2.6 |                  |
| DMR11:1219201  | 11 | 1219201  | 4400  | 5  | 3.30E-14 | 160 | 3.6 | atp2b2           |
| DMR11:1321101  | 11 | 1321101  | 7000  | 25 | 2.83E-29 | 159 | 2.2 | iars             |
| DMR11:1486301  | 11 | 1486301  | 7300  | 2  | 1.16E-09 | 212 | 2.9 | acot8            |
| DMR11:1631001  | 11 | 1631001  | 11200 | 2  | 9.17E-09 | 224 | 2   | LRP1 (2 of 2)    |
| DMR11:1689401  | 11 | 1689401  | 5200  | 5  | 1.45E-13 | 163 | 3.1 | LRP1 (2 of 2)    |
| DMR11:1703701  | 11 | 1703701  | 6000  | 3  | 2.04E-14 | 147 | 2.4 | LRP1 (2 of 2)    |
| DMR11:1746801  | 11 | 1746801  | 2700  | 2  | 7.37E-11 | 93  | 3.4 | LRP1 (2 of 2)    |
| DMR11:1765501  | 11 | 1765501  | 4600  | 2  | 2.34E-08 | 126 | 2.7 | LRP1 (2 of 2)    |
| DMR11:16463001 | 11 | 16463001 | 2700  | 3  | 1.26E-10 | 124 | 4.5 |                  |
| DMR11:16469601 | 11 | 16469601 | 1800  | 3  | 4.44E-11 | 90  | 5   |                  |
| DMR11:17705801 | 11 | 17705801 | 2100  | 3  | 1.89E-09 | 95  | 4.5 |                  |
| DMR11:37308801 | 11 | 37308801 | 2200  | 2  | 2.05E-10 | 42  | 1.9 |                  |
| DMR11:38399201 | 11 | 38399201 | 2100  | 2  | 5.89E-11 | 77  | 3.6 |                  |
| DMR11:38487401 | 11 | 38487401 | 1000  | 2  | 3.42E-09 | 10  | 1   | epha8            |
| DMR11:39766801 | 11 | 39766801 | 1500  | 2  | 1.65E-12 | 18  | 1.2 |                  |
| DMR11:40058201 | 11 | 40058201 | 5100  | 3  | 3.10E-13 | 106 | 2   |                  |
| DMR11:41633401 | 11 | 41633401 | 2700  | 5  | 5.07E-14 | 15  | 0.5 |                  |
| DMR12:1351201  | 12 | 1351201  | 6900  | 3  | 2.26E-10 | 206 | 2.9 | pemt             |
| DMR12:7709501  | 12 | 7709501  | 2800  | 3  | 5.84E-13 | 79  | 2.8 | ank3b            |
| DMR12:11179701 | 12 | 11179701 | 20600 | 2  | 4.00E-09 | 582 | 2.8 |                  |
| DMR12:34960201 | 12 | 34960201 | 6200  | 2  | 6.83E-09 | 120 | 1.9 | 112285           |
| DMR12:37594701 | 12 | 37594701 | 3100  | 2  | 1.75E-10 | 54  | 1.7 |                  |
| DMR13:2632001  | 13 | 2632001  | 2000  | 4  | 2.48E-16 | 57  | 2.8 | wdr11            |
| DMR13:2665501  | 13 | 2665501  | 5100  | 10 | 2.16E-27 | 134 | 2.6 | wdr11            |
| DMR13:8301301  | 13 | 8301301  | 2900  | 2  | 3.19E-11 | 143 | 4.9 |                  |



|                |    |          |      |    |          |     |     |                     |
|----------------|----|----------|------|----|----------|-----|-----|---------------------|
| DMR13:10424801 | 13 | 10424801 | 800  | 3  | 7.41E-14 | 17  | 2.1 | ch73-54n14.2        |
| DMR13:10440101 | 13 | 10440101 | 5800 | 4  | 9.79E-11 | 129 | 2.2 | ch73-54n14.2        |
| DMR13:12435901 | 13 | 12435901 | 4700 | 2  | 2.38E-11 | 43  | 0.9 | enpep               |
| DMR13:12612301 | 13 | 12612301 | 2200 | 4  | 1.40E-18 | 27  | 1.2 | metap1              |
| DMR13:13109801 | 13 | 13109801 | 3200 | 2  | 1.02E-13 | 87  | 2.7 | fgfr3               |
| DMR13:13196901 | 13 | 13196901 | 1400 | 3  | 6.61E-11 | 48  | 3.4 |                     |
| DMR13:13233001 | 13 | 13233001 | 2500 | 2  | 4.26E-09 | 84  | 3.3 |                     |
| DMR13:18077601 | 13 | 18077601 | 5800 | 5  | 2.51E-10 | 240 | 4.1 | tet1                |
| DMR13:21354201 | 13 | 21354201 | 400  | 2  | 1.15E-08 | 3   | 0.7 |                     |
| DMR13:22908101 | 13 | 22908101 | 400  | 2  | 3.79E-10 | 27  | 6.7 | supv3l1             |
| DMR13:23021701 | 13 | 23021701 | 2700 | 2  | 2.90E-09 | 90  | 3.3 | sorbs1              |
| DMR13:23363001 | 13 | 23363001 | 3900 | 4  | 8.90E-12 | 104 | 2.6 | prim2               |
| DMR13:24034601 | 13 | 24034601 | 2500 | 3  | 2.78E-11 | 53  | 2.1 | galnt2              |
| DMR13:26639501 | 13 | 26639501 | 3600 | 2  | 1.10E-20 | 85  | 2.3 | fancl               |
| DMR13:26796301 | 13 | 26796301 | 700  | 2  | 1.79E-08 | 21  | 3   |                     |
| DMR13:27724001 | 13 | 27724001 | 8900 | 20 | 5.84E-12 | 271 | 3   |                     |
| DMR13:27747601 | 13 | 27747601 | 700  | 4  | 9.66E-11 | 19  | 2.7 |                     |
| DMR13:28316601 | 13 | 28316601 | 2500 | 3  | 1.59E-14 | 56  | 2.2 |                     |
| DMR13:28435101 | 13 | 28435101 | 1800 | 2  | 1.58E-08 | 37  | 2   |                     |
| DMR13:29142601 | 13 | 29142601 | 5500 | 5  | 1.41E-13 | 231 | 4.2 | MYOF (2 of 2)       |
| DMR13:48571401 | 13 | 48571401 | 5800 | 2  | 1.51E-08 | 154 | 2.6 |                     |
| DMR14:4045801  | 14 | 4045801  | 400  | 2  | 1.65E-10 | 3   | 0.7 | dhhs13l1            |
| DMR14:4297001  | 14 | 4297001  | 1800 | 2  | 7.56E-09 | 50  | 2.7 |                     |
| DMR14:4352901  | 14 | 4352901  | 2700 | 2  | 1.15E-08 | 82  | 3   | GABRA4              |
| DMR14:6224301  | 14 | 6224301  | 2100 | 2  | 8.61E-11 | 45  | 2.1 | ch211-198i6.4       |
| DMR14:6407001  | 14 | 6407001  | 1400 | 3  | 2.52E-10 | 32  | 2.2 | COL23A1 (2 of 2)    |
| DMR14:7286901  | 14 | 7286901  | 3100 | 4  | 7.28E-14 | 93  | 3   |                     |
| DMR14:8610101  | 14 | 8610101  | 2400 | 4  | 1.09E-11 | 62  | 2.5 | 153681              |
| DMR14:8613701  | 14 | 8613701  | 2500 | 11 | 5.70E-32 | 57  | 2.2 | 153681              |
| DMR14:23562401 | 14 | 23562401 | 6200 | 4  | 1.47E-14 | 110 | 1.7 |                     |
| DMR14:43486101 | 14 | 43486101 | 2100 | 2  | 8.33E-09 | 17  | 0.8 |                     |
| DMR14:46143801 | 14 | 46143801 | 700  | 4  | 1.99E-19 | 20  | 2.8 |                     |
| DMR14:47320801 | 14 | 47320801 | 1500 | 6  | 4.22E-22 | 25  | 1.6 | crybb1l1            |
| DMR15:4629801  | 15 | 4629801  | 1900 | 2  | 8.02E-11 | 46  | 2.4 |                     |
| DMR15:8415401  | 15 | 8415401  | 700  | 3  | 2.15E-15 | 17  | 2.4 |                     |
| DMR15:14568101 | 15 | 14568101 | 2800 | 2  | 2.20E-16 | 90  | 3.2 | numbl               |
| DMR15:15205301 | 15 | 15205301 | 1000 | 5  | 2.73E-13 | 57  | 5.7 |                     |
| DMR15:17310401 | 15 | 17310401 | 1700 | 2  | 1.34E-08 | 50  | 2.9 |                     |
| DMR15:17327201 | 15 | 17327201 | 3500 | 4  | 3.29E-17 | 69  | 1.9 | dhx40               |
| DMR15:18099401 | 15 | 18099401 | 1800 | 2  | 1.22E-10 | 40  | 2.2 | phldb1b             |
| DMR15:28664901 | 15 | 28664901 | 400  | 2  | 4.49E-10 | 14  | 3.5 |                     |
| DMR15:41807601 | 15 | 41807601 | 900  | 2  | 1.03E-09 | 26  | 2.8 |                     |
| DMR15:43849201 | 15 | 43849201 | 5200 | 2  | 4.30E-10 | 84  | 1.6 |                     |
| DMR16:1359501  | 16 | 1359501  | 2800 | 2  | 7.47E-10 | 34  | 1.2 | cers2b              |
| DMR16:1744201  | 16 | 1744201  | 2600 | 4  | 1.04E-11 | 53  | 2   |                     |
| DMR16:22010501 | 16 | 22010501 | 4600 | 8  | 2.05E-13 | 172 | 3.7 |                     |
| DMR16:29411601 | 16 | 29411601 | 600  | 3  | 9.05E-09 | 23  | 3.8 |                     |
| DMR16:29822701 | 16 | 29822701 | 500  | 2  | 1.04E-12 | 4   | 0.8 |                     |
| DMR16:32433501 | 16 | 32433501 | 3200 | 4  | 4.79E-09 | 62  | 1.9 |                     |
| DMR16:35830501 | 16 | 35830501 | 1700 | 2  | 2.92E-13 | 22  | 1.2 |                     |
| DMR16:36368801 | 16 | 36368801 | 2600 | 2  | 1.20E-12 | 45  | 1.7 |                     |
| DMR16:37267901 | 16 | 37267901 | 900  | 5  | 8.56E-20 | 30  | 3.3 | TSNARE1             |
| DMR16:38693501 | 16 | 38693501 | 1700 | 3  | 2.41E-09 | 40  | 2.3 |                     |
| DMR16:43445101 | 16 | 43445101 | 4600 | 6  | 1.86E-14 | 104 | 2.2 | FO704821.1;ccdc127a |
| DMR16:44448301 | 16 | 44448301 | 500  | 2  | 1.94E-08 | 18  | 3.6 | sult2st3            |

|                |    |          |      |   |          |     |     |                       |
|----------------|----|----------|------|---|----------|-----|-----|-----------------------|
| DMR16:54373001 | 16 | 54373001 | 7600 | 2 | 2.84E-09 | 218 | 2.8 | xrcc1                 |
| DMR16:55305301 | 16 | 55305301 | 1000 | 2 | 1.89E-08 | 35  | 3.5 | CNDP1                 |
| DMR17:656101   | 17 | 656101   | 3600 | 3 | 1.06E-11 | 91  | 2.5 | ch211-193k8.5;dnajc17 |
| DMR17:730801   | 17 | 730801   | 1000 | 3 | 5.23E-09 | 48  | 4.8 | dnajc17               |
| DMR17:1552001  | 17 | 1552001  | 1100 | 2 | 2.07E-09 | 96  | 8.7 | NA                    |
| DMR17:2782201  | 17 | 2782201  | 3100 | 2 | 3.00E-12 | 75  | 2.4 |                       |
| DMR17:4691101  | 17 | 4691101  | 4000 | 4 | 6.15E-25 | 94  | 2.3 | KLHL29 (1 of 2)       |
| DMR17:7873501  | 17 | 7873501  | 1700 | 3 | 2.43E-34 | 75  | 4.4 | syne1b                |
| DMR17:8203801  | 17 | 8203801  | 2900 | 7 | 3.40E-18 | 95  | 3.2 | cdc42bpaa             |
| DMR17:8778001  | 17 | 8778001  | 1200 | 2 | 2.80E-10 | 48  | 4   | psmc1a                |
| DMR17:14505201 | 17 | 14505201 | 1200 | 4 | 2.14E-24 | 13  | 1   | daam1a                |
| DMR17:14772501 | 17 | 14772501 | 3000 | 2 | 6.27E-09 | 67  | 2.2 | ch211-266o15.1        |
| DMR17:50358601 | 17 | 50358601 | 5100 | 3 | 2.75E-09 | 138 | 2.7 |                       |
| DMR17:51251501 | 17 | 51251501 | 700  | 2 | 5.25E-10 | 15  | 2.1 |                       |
| DMR17:51757501 | 17 | 51757501 | 3900 | 3 | 5.76E-21 | 176 | 4.5 | numb                  |
| DMR17:52022801 | 17 | 52022801 | 1400 | 6 | 2.77E-12 | 58  | 4.1 |                       |
| DMR17:52115501 | 17 | 52115501 | 6800 | 2 | 4.71E-11 | 181 | 2.6 |                       |
| DMR17:52816001 | 17 | 52816001 | 3300 | 8 | 3.28E-18 | 99  | 3   | meis2a                |
| DMR17:52867901 | 17 | 52867901 | 3800 | 2 | 3.35E-14 | 85  | 2.2 | C17H15orf41           |
| DMR17:52913101 | 17 | 52913101 | 3300 | 3 | 1.08E-09 | 112 | 3.3 | C17H15orf41           |
| DMR17:53131201 | 17 | 53131201 | 4700 | 4 | 1.58E-10 | 72  | 1.5 |                       |
| DMR18:2197401  | 18 | 2197401  | 2300 | 9 | 4.88E-11 | 35  | 1.5 |                       |
| DMR18:2941701  | 18 | 2941701  | 7900 | 4 | 9.23E-12 | 189 | 2.3 | clns1a                |
| DMR18:2960001  | 18 | 2960001  | 3100 | 2 | 1.15E-08 | 81  | 2.6 |                       |
| DMR18:2971401  | 18 | 2971401  | 1600 | 2 | 3.15E-09 | 74  | 4.6 | rsf1a                 |
| DMR18:3188401  | 18 | 3188401  | 1500 | 3 | 3.84E-09 | 54  | 3.6 |                       |
| DMR18:3276701  | 18 | 3276701  | 2700 | 2 | 1.63E-09 | 77  | 2.8 | pak1                  |
| DMR18:3317301  | 18 | 3317301  | 1600 | 2 | 4.06E-09 | 48  | 3   |                       |
| DMR18:3456301  | 18 | 3456301  | 5000 | 2 | 8.61E-09 | 118 | 2.3 | eif2a                 |
| DMR18:8796301  | 18 | 8796301  | 900  | 2 | 4.31E-09 | 17  | 1.8 |                       |
| DMR18:11004901 | 18 | 11004901 | 1600 | 2 | 9.16E-11 | 26  | 1.6 | ch211-59c24.1         |
| DMR18:36671501 | 18 | 36671501 | 800  | 2 | 2.33E-09 | 30  | 3.7 |                       |
| DMR18:38110401 | 18 | 38110401 | 3900 | 4 | 1.70E-11 | 72  | 1.8 |                       |
| DMR18:38463601 | 18 | 38463601 | 500  | 2 | 5.49E-09 | 10  | 2   |                       |
| DMR18:39019801 | 18 | 39019801 | 6500 | 3 | 1.11E-09 | 134 | 2   | myo5aa                |
| DMR18:39628101 | 18 | 39628101 | 3600 | 2 | 3.41E-10 | 72  | 2   |                       |
| DMR18:47695101 | 18 | 47695101 | 700  | 5 | 9.60E-19 | 11  | 1.5 |                       |
| DMR18:48025101 | 18 | 48025101 | 1300 | 3 | 6.61E-13 | 56  | 4.3 |                       |
| DMR18:48920001 | 18 | 48920001 | 2000 | 2 | 1.00E-10 | 87  | 4.3 | ppp1r37               |
| DMR18:50799701 | 18 | 50799701 | 4300 | 6 | 3.01E-18 | 65  | 1.5 | ddb1                  |
| DMR19:23601    | 19 | 23601    | 3800 | 2 | 1.33E-09 | 99  | 2.6 | gpd1c                 |
| DMR19:1454801  | 19 | 1454801  | 4100 | 2 | 9.38E-09 | 89  | 2.1 |                       |
| DMR19:1622701  | 19 | 1622701  | 800  | 3 | 2.41E-10 | 34  | 4.2 |                       |
| DMR19:17841801 | 19 | 17841801 | 1500 | 3 | 1.77E-09 | 107 | 7.1 |                       |
| DMR19:35537801 | 19 | 35537801 | 800  | 4 | 4.22E-11 | 27  | 3.3 | macf1a                |
| DMR19:48419401 | 19 | 48419401 | 2400 | 2 | 6.48E-08 | 64  | 2.6 | psmd3;btr30           |
| DMR20:3615101  | 20 | 3615101  | 1100 | 2 | 3.23E-08 | 41  | 3.7 | CABZ01071723.1        |
| DMR20:4992601  | 20 | 4992601  | 4300 | 4 | 1.45E-09 | 133 | 3   | arid1b                |
| DMR20:5558801  | 20 | 5558801  | 3000 | 4 | 1.15E-12 | 50  | 1.6 | nrnx3b                |
| DMR20:9384301  | 20 | 9384301  | 2200 | 3 | 5.68E-18 | 40  | 1.8 | BEGAIN                |
| DMR20:15628101 | 20 | 15628101 | 500  | 3 | 1.12E-14 | 17  | 3.4 |                       |
| DMR20:25707301 | 20 | 25707301 | 900  | 2 | 1.96E-08 | 47  | 5.2 | cyp2j20               |
| DMR20:28546801 | 20 | 28546801 | 4700 | 4 | 2.52E-10 | 105 | 2.2 | dpf3                  |
| DMR20:30709801 | 20 | 30709801 | 2100 | 3 | 1.83E-13 | 53  | 2.5 | ccr6a                 |
| DMR20:32207101 | 20 | 32207101 | 700  | 3 | 6.27E-14 | 35  | 5   | grm1a                 |

|                |    |          |       |   |          |     |     |                            |
|----------------|----|----------|-------|---|----------|-----|-----|----------------------------|
| DMR20:33274101 | 20 | 33274101 | 1400  | 2 | 4.46E-10 | 11  | 0.7 | ddx1                       |
| DMR20:54037401 | 20 | 54037401 | 1800  | 2 | 4.51E-09 | 74  | 4.1 |                            |
| DMR20:54276001 | 20 | 54276001 | 1400  | 3 | 3.42E-15 | 53  | 3.7 |                            |
| DMR20:54335201 | 20 | 54335201 | 2200  | 5 | 4.87E-13 | 92  | 4.1 |                            |
| DMR20:54729401 | 20 | 54729401 | 900   | 3 | 1.44E-08 | 6   | 0.6 |                            |
| DMR20:55005801 | 20 | 55005801 | 4000  | 2 | 3.16E-09 | 31  | 0.7 |                            |
| DMR21:1920301  | 21 | 1920301  | 1400  | 3 | 3.51E-09 | 38  | 2.7 | WDR7                       |
| DMR21:3157401  | 21 | 3157401  | 3800  | 3 | 2.16E-08 | 73  | 1.9 | CTIF                       |
| DMR21:7127501  | 21 | 7127501  | 2100  | 3 | 2.70E-10 | 64  | 3   |                            |
| DMR21:16032501 | 21 | 16032501 | 11500 | 3 | 1.09E-11 | 93  | 0.8 |                            |
| DMR21:19248101 | 21 | 19248101 | 3700  | 8 | 3.22E-19 | 88  | 2.3 |                            |
| DMR21:20216801 | 21 | 20216801 | 10800 | 2 | 2.03E-09 | 463 | 4.2 | dkey-247m21.3              |
| DMR21:24438801 | 21 | 24438801 | 1000  | 3 | 2.20E-09 | 42  | 4.2 |                            |
| DMR21:24934801 | 21 | 24934801 | 5500  | 2 | 2.49E-12 | 208 | 3.7 |                            |
| DMR21:27805601 | 21 | 27805601 | 3500  | 4 | 3.13E-12 | 91  | 2.6 | nrxn2a                     |
| DMR21:29267701 | 21 | 29267701 | 3700  | 2 | 6.11E-17 | 83  | 2.2 | BX537120.1                 |
| DMR21:29368001 | 21 | 29368001 | 2200  | 3 | 1.14E-11 | 98  | 4.4 | 171310;BX537120.1          |
| DMR21:32661901 | 21 | 32661901 | 2500  | 2 | 2.75E-20 | 50  | 2   |                            |
| DMR21:34921401 | 21 | 34921401 | 1900  | 2 | 1.59E-12 | 46  | 2.4 | lipia                      |
| DMR21:35056001 | 21 | 35056001 | 4200  | 5 | 6.95E-10 | 111 | 2.6 |                            |
| DMR21:35114601 | 21 | 35114601 | 1000  | 2 | 2.33E-11 | 30  | 3   |                            |
| DMR21:35219601 | 21 | 35219601 | 3900  | 5 | 2.49E-11 | 83  | 2.1 | ubtd2                      |
| DMR21:35403401 | 21 | 35403401 | 2500  | 3 | 1.15E-11 | 75  | 3   | dkeyp-23e4.3               |
| DMR21:35457401 | 21 | 35457401 | 6800  | 2 | 1.50E-13 | 157 | 2.3 | dkeyp-23e4.3               |
| DMR21:35759501 | 21 | 35759501 | 1300  | 2 | 6.39E-10 | 38  | 2.9 | sgcd                       |
| DMR21:35919401 | 21 | 35919401 | 3800  | 2 | 1.68E-11 | 118 | 3.1 |                            |
| DMR21:35931301 | 21 | 35931301 | 2200  | 2 | 1.18E-15 | 46  | 2   |                            |
| DMR21:36036601 | 21 | 36036601 | 600   | 2 | 1.64E-09 | 16  | 2.6 |                            |
| DMR21:36135601 | 21 | 36135601 | 1300  | 2 | 5.93E-10 | 35  | 2.6 |                            |
| DMR21:36469801 | 21 | 36469801 | 700   | 2 | 1.69E-09 | 17  | 2.4 | gabrb4                     |
| DMR21:42294601 | 21 | 42294601 | 3800  | 2 | 2.41E-10 | 102 | 2.6 |                            |
| DMR21:42333301 | 21 | 42333301 | 6100  | 3 | 1.48E-10 | 131 | 2.1 |                            |
| DMR21:44327201 | 21 | 44327201 | 6000  | 2 | 2.74E-11 | 76  | 1.2 | gabra3                     |
| DMR22:52901    | 22 | 52901    | 2500  | 6 | 9.31E-09 | 161 | 6.4 | mrpl20                     |
| DMR22:4466901  | 22 | 4466901  | 1000  | 4 | 2.63E-12 | 34  | 3.4 | ch73-256j6.7;:ch73-256j6.5 |
| DMR22:4470201  | 22 | 4470201  | 3400  | 3 | 9.97E-17 | 85  | 2.5 | ch73-256j6.7;ch73-256j6.5  |
| DMR22:4561501  | 22 | 4561501  | 700   | 2 | 9.99E-09 | 14  | 2   |                            |
| DMR22:9624901  | 22 | 9624901  | 2200  | 2 | 3.48E-10 | 52  | 2.3 | RNH1 (12 of 55)            |
| DMR22:16239001 | 22 | 16239001 | 3600  | 3 | 7.93E-11 | 94  | 2.6 | cdc14ab                    |
| DMR22:20722801 | 22 | 20722801 | 1300  | 2 | 1.89E-10 | 31  | 2.3 | amh                        |
| DMR22:26599401 | 22 | 26599401 | 6100  | 4 | 1.65E-10 | 105 | 1.7 | capn8;capn2l               |
| DMR22:26625901 | 22 | 26625901 | 2400  | 2 | 7.46E-09 | 47  | 1.9 | capn2l                     |
| DMR22:28193801 | 22 | 28193801 | 1500  | 2 | 1.34E-10 | 47  | 3.1 |                            |
| DMR22:28243701 | 22 | 28243701 | 8300  | 3 | 1.72E-10 | 162 | 1.9 |                            |
| DMR22:29724401 | 22 | 29724401 | 1600  | 2 | 4.24E-08 | 32  | 2   | pdcd4b                     |
| DMR22:30129001 | 22 | 30129001 | 4800  | 3 | 4.04E-10 | 126 | 2.6 | add3a                      |
| DMR22:30136601 | 22 | 30136601 | 1300  | 3 | 3.24E-08 | 37  | 2.8 | add3a                      |
| DMR22:34908801 | 22 | 34908801 | 500   | 2 | 1.38E-10 | 35  | 7   | slit1b                     |
| DMR22:37380301 | 22 | 37380301 | 2200  | 4 | 7.85E-13 | 63  | 2.8 |                            |
| DMR22:37451201 | 22 | 37451201 | 2200  | 4 | 7.33E-13 | 13  | 0.5 | ch73-334e23.1              |
| DMR22:37456701 | 22 | 37456701 | 1500  | 2 | 3.82E-11 | 87  | 5.8 | ch73-334e23.1              |
| DMR23:2123201  | 23 | 2123201  | 1400  | 2 | 7.91E-15 | 30  | 2.1 |                            |
| DMR23:2139901  | 23 | 2139901  | 800   | 2 | 1.03E-08 | 17  | 2.1 |                            |
| DMR23:14135001 | 23 | 14135001 | 4700  | 3 | 2.23E-11 | 151 | 3.2 |                            |
| DMR23:15622301 | 23 | 15622301 | 2200  | 2 | 8.88E-09 | 34  | 1.5 |                            |

|                |    |          |      |   |          |     |     |                |
|----------------|----|----------|------|---|----------|-----|-----|----------------|
| DMR23:44152601 | 23 | 44152601 | 800  | 2 | 3.34E-17 | 28  | 3.5 | CORIN          |
| DMR23:45582101 | 23 | 45582101 | 9500 | 4 | 3.94E-10 | 250 | 2.6 | PSIP1 (1 of 2) |
| DMR24:331201   | 24 | 331201   | 1400 | 3 | 2.59E-25 | 57  | 4   |                |
| DMR24:834001   | 24 | 834001   | 1300 | 2 | 7.78E-26 | 39  | 3   | napga          |
| DMR24:22719801 | 24 | 22719801 | 2700 | 7 | 9.97E-18 | 63  | 2.3 |                |
| DMR24:24876301 | 24 | 24876301 | 1500 | 2 | 1.45E-09 | 49  | 3.2 | nupl1          |
| DMR24:27134701 | 24 | 27134701 | 1500 | 6 | 1.11E-13 | 53  | 3.5 | dip2ca         |
| DMR24:32406101 | 24 | 32406101 | 1700 | 2 | 1.18E-10 | 40  | 2.3 |                |
| DMR24:33467001 | 24 | 33467001 | 1800 | 4 | 6.44E-14 | 53  | 2.9 |                |
| DMR24:41599801 | 24 | 41599801 | 2700 | 2 | 3.76E-08 | 81  | 3   |                |
| DMR25:1707901  | 25 | 1707901  | 2200 | 2 | 1.51E-08 | 14  | 0.6 |                |
| DMR25:1897301  | 25 | 1897301  | 700  | 2 | 6.00E-09 | 37  | 5.2 |                |
| DMR25:6345401  | 25 | 6345401  | 3800 | 2 | 2.20E-08 | 63  | 1.6 | snx33          |
| DMR25:35284401 | 25 | 35284401 | 2300 | 3 | 2.83E-10 | 79  | 3.4 | cpne8          |
| DMR25:36468801 | 25 | 36468801 | 1300 | 2 | 1.05E-09 | 45  | 3.4 | wwox           |
| DMR25:36680301 | 25 | 36680301 | 900  | 5 | 9.21E-12 | 15  | 1.6 | rfwd3          |
