# Supplementary material for: Mercury-induced epigenetic transgenerational inheritance of abnormal neurobehavior is correlated with sperm epimutations in zebrafish
Source: PubMed Central journal article supplement (PMC5413066; doi:10.1371/journal.pone.0176155), 2017-05-02
Supplement: pone.0176155.s008.pdf [file pone.0176155.s008.pdf]

## Supplemental Table S5

### DMR Cluster List and Characteristics

#### A. F0

| chr | start    | stop     | minP        |
|-----|----------|----------|-------------|
| 4   | 46100000 | 50200000 | 0.027821639 |
| 4   | 55750000 | 60750000 | 0.013208126 |
| 4   | 65900000 | 70100000 | 1.81E-05    |

#### B. F2

| chr | start    | stop     | minP        |
|-----|----------|----------|-------------|
| 1   | 52800000 | 56450000 | 0.000130448 |
| 10  | 2350000  | 9200000  | 0.000614862 |
| 11  | 50000    | 3150000  | 0.02621217  |
| 17  | 51150000 | 53200000 | 0.02621217  |
| 18  | 1500000  | 4100000  | 0.02621217  |
| 2   | 4400000  | 8.00E+06 | 0.000614862 |
| 21  | 33950000 | 37350000 | 0.000130448 |
| 3   | 1350000  | 10100000 | 0.02621217  |
| 3   | 12050000 | 15950000 | 4.97E-07    |
| 4   | 70850000 | 74750000 | 0.000614862 |
| 5   | 2450000  | 7600000  | 0.02621217  |
| 5   | 62700000 | 72350000 | 3.71E-06    |
| 6   | 58200000 | 61250000 | 0.000130448 |
| 8   | 47150000 | 49250000 | 0.02621217  |
| 9   | 18150000 | 21750000 | 0.02621217  |
