# Supplementary material for: Mercury-induced epigenetic transgenerational inheritance of abnormal neurobehavior is correlated with sperm epimutations in zebrafish
Source: PubMed Central journal article supplement (PMC5413066; doi:10.1371/journal.pone.0176155), 2017-05-02
Supplement: pone.0176155.s009.pdf [file pone.0176155.s009.pdf]

Supplemental Table S6

## F0 Sperm DMR Associated Genes

| DMR Name      | Gene Symbol      | Entrezgene | Chr | start_position | Ensemb #           | Gene Description                             | Functional Category |
|---------------|------------------|------------|-----|----------------|--------------------|----------------------------------------------|---------------------|
| DMR2:34637701 | astn1            | 791157     | 2   | 34589765       | ENSDARG00000068323 | astrotactin 1                                | ECM                 |
| DMR3:53595001 | col5a3a          | 100330523  | 3   | 53518593       | ENSDARG00000098294 | collagen - type V - alpha 3a                 | Cytoskeleton        |
| DMR3:57175901 | fscn2a           | 798075     | 3   | 57166577       | ENSDARG00000059574 | fascin actin-bundling protein 2a - retinal   | Cytoskeleton        |
| DMR4:6914401  | dock4b           | 654774     | 4   | 6825021        | ENSDARG00000024874 | dedicator of cytokinesis 4b                  | Cell Cycle          |
| DMR4:7479801  | cald1l2          | NA         | 4   | 7406749        | ENSDARG00000070314 | caldesmon 1 like 2                           | Cytoskeleton        |
| DMR4:25320901 | sfmbt2           | NA         | 4   | 25311776       | ENSDARG00000045519 | Scm-like with four mbt domains 2             | Transcription       |
| DMR4:26986301 | slc6a1l          | NA         | 4   | 26983691       | ENSDARG00000041205 | solute carrier family 6 (neurotransmitter tr | Development         |
| DMR4:29125601 | fb11h05          | 563440     | 4   | 28860207       | ENSDARG00000074009 | fb11h05                                      | NA                  |
| DMR4:29131601 | fb11h05          | 563440     | 4   | 28860207       | ENSDARG00000074009 | fb11h05                                      | NA                  |
| DMR4:29690601 | ch211-214c20.1   | NA         | 4   | 29666316       | ENSDARG00000088082 | ch211-214c20.1                               | NA                  |
| DMR4:30279501 | RNH1 (6 of 55)   | 560084     | 4   | 30254666       | ENSDARG00000089582 | ribonuclease/angiogenin inhibitor 1          | Translation         |
| DMR4:30506601 | dkey-199m13.6    | NA         | 4   | 30451340       | ENSDARG00000102799 | dkey-199m13.6                                | NA                  |
| DMR4:33980601 | dkey-28i19.3     | NA         | 4   | 33967055       | ENSDARG00000098177 | dkey-28i19.3                                 | NA                  |
| DMR4:34064901 | U1               | NA         | 4   | 34064976       | ENSDARG00000102649 | U1 spliceosomal RNA                          | Translation         |
| DMR4:34064901 | U1               | NA         | 4   | 34066269       | ENSDARG00000100840 | U1 spliceosomal RNA                          | Translation         |
| DMR4:36504301 | dkeyp-87d1.10    | NA         | 4   | 36421918       | ENSDARG00000103473 | dkeyp-87d1.10                                | NA                  |
| DMR4:37866401 | RNH1 (39 of 55)  | NA         | 4   | 37867118       | ENSDARG00000102273 | ribonuclease/angiogenin inhibitor 1          | Translation         |
| DMR4:39532701 | dkey-16p6.1      | NA         | 4   | 39529822       | ENSDARG00000104850 | dkey-16p6.1                                  | NA                  |
| DMR4:39614001 | 174700           | NA         | 4   | 39601670       | ENSDARG00000091176 | 174700                                       | NA                  |
| DMR4:40931001 | ch211-231i17.4   | NA         | 4   | 40929396       | ENSDARG00000092596 | ch211-231i17.4                               | NA                  |
| DMR4:43184201 | ch211-226o13.1   | NA         | 4   | 43172804       | ENSDARG00000087714 | ch211-226o13.1                               | NA                  |
| DMR4:44610401 | ch211-162i8.7    | NA         | 4   | 44507344       | ENSDARG00000096216 | ch211-162i8.7                                | NA                  |
| DMR4:44695001 | dkey-256i11.2    | 557877     | 4   | 44666428       | ENSDARG00000093713 | dkey-256i11.2                                | NA                  |
| DMR4:44695001 | ch211-162i8.7    | NA         | 4   | 44507344       | ENSDARG00000096216 | ch211-162i8.7                                | NA                  |
| DMR4:44695001 | TRIM14 (4 of 28) | NA         | 4   | 44691171       | ENSDARG00000087699 | tripartite motif containing 14               | NA                  |
| DMR4:44702301 | dkey-256i11.2    | 557877     | 4   | 44666428       | ENSDARG00000093713 | dkey-256i11.2                                | NA                  |
| DMR4:44702301 | ch211-162i8.7    | NA         | 4   | 44507344       | ENSDARG00000096216 | ch211-162i8.7                                | NA                  |
| DMR4:44992201 | ch211-162i8.7    | NA         | 4   | 44507344       | ENSDARG00000096216 | ch211-162i8.7                                | NA                  |
| DMR4:45259701 | ch211-215p11.3   | NA         | 4   | 45245543       | ENSDARG00000101450 | ch211-215p11.3                               | NA                  |
| DMR4:45955701 | dkey-240b24.1    | NA         | 4   | 45818007       | ENSDARG00000098796 | dkey-240b24.1                                | NA                  |
| DMR4:45970001 | BX470149.1       | NA         | 4   | 45969200       | ENSDARG00000098426 | BX470149.1                                   | NA                  |
| DMR4:45970001 | dkey-240b24.1    | NA         | 4   | 45818007       | ENSDARG00000098796 | dkey-240b24.1                                | NA                  |
| DMR4:47448201 | ch211-42i6.2     | NA         | 4   | 47446725       | ENSDARG00000086130 | ch211-42i6.2                                 | NA                  |
| DMR4:47454401 | ch211-42i6.2     | NA         | 4   | 47446725       | ENSDARG00000086130 | ch211-42i6.2                                 | NA                  |
| DMR4:47736101 | NA               | NA         | 4   | 47738340       | ENSDARG00000088142 | NA                                           | NA                  |
| DMR4:47792001 | ch211-197e7.3    | NA         | 4   | 47771778       | ENSDARG00000088616 | ch211-197e7.3                                | NA                  |
| DMR4:47860901 | ch211-197e7.2    | NA         | 4   | 47848850       | ENSDARG00000090532 | ch211-197e7.2                                | NA                  |
| DMR4:47860901 | ch211-197e7.3    | NA         | 4   | 47771778       | ENSDARG00000088616 | ch211-197e7.3                                | NA                  |
| DMR4:47860901 | dkey-5i16.1      | NA         | 4   | 47841075       | ENSDARG00000088000 | dkey-5i16.1                                  | NA                  |
| DMR4:47963601 | ch211-197e7.1    | NA         | 4   | 47949687       | ENSDARG00000095200 | ch211-197e7.1                                | NA                  |
| DMR4:48007701 | RNH1 (7 of 55)   | NA         | 4   | 48010069       | ENSDARG00000090160 | ribonuclease/angiogenin inhibitor 1          | Translation         |
| DMR4:48028101 | RNH1 (7 of 55)   | NA         | 4   | 48010069       | ENSDARG00000090160 | ribonuclease/angiogenin inhibitor 1          | Translation         |
| DMR4:48052301 | RNH1 (7 of 55)   | NA         | 4   | 48010069       | ENSDARG00000090160 | ribonuclease/angiogenin inhibitor 1          | Translation         |
| DMR4:48060201 | RNH1 (7 of 55)   | NA         | 4   | 48010069       | ENSDARG00000090160 | ribonuclease/angiogenin inhibitor 1          | Translation         |
| DMR4:48072401 | RNH1 (7 of 55)   | NA         | 4   | 48010069       | ENSDARG00000090160 | ribonuclease/angiogenin inhibitor 1          | Translation         |
| DMR4:48075001 | RNH1 (7 of 55)   | NA         | 4   | 48010069       | ENSDARG00000090160 | ribonuclease/angiogenin inhibitor 1          | Translation         |
| DMR4:48095701 | RNH1 (7 of 55)   | NA         | 4   | 48010069       | ENSDARG00000090160 | ribonuclease/angiogenin inhibitor 1          | Translation         |
| DMR4:48103601 | RNH1 (7 of 55)   | NA         | 4   | 48010069       | ENSDARG00000090160 | ribonuclease/angiogenin inhibitor 1          | Translation         |
| DMR4:48425601 | 173619           | 100006880  | 4   | 48337865       | ENSDARG00000088961 | 173619                                       | NA                  |
| DMR4:48454401 | 173619           | 100006880  | 4   | 48337865       | ENSDARG00000088961 | 173619                                       | NA                  |
| DMR4:48454401 | dkey-16p6.1      | NA         | 4   | 48445504       | ENSDARG00000089179 | dkey-16p6.1                                  | NA                  |
| DMR4:48593601 | 173619           | 100006880  | 4   | 48337865       | ENSDARG00000088961 | 173619                                       | NA                  |
| DMR4:49333101 | dkey-82i20.3     | 100005493  | 4   | 49306725       | ENSDARG00000102735 | dkey-82i20.3                                 | NA                  |
| DMR4:49333101 | NA               | NA         | 4   | 49336148       | ENSDARG00000098306 | NA                                           | NA                  |
| DMR4:49361201 | dkey-82i20.3     | 100005493  | 4   | 49306725       | ENSDARG00000102735 | dkey-82i20.3                                 | NA                  |
| DMR4:49361201 | NA               | NA         | 4   | 49336148       | ENSDARG00000098306 | NA                                           | NA                  |
| DMR4:49379001 | dkey-82i20.3     | 100005493  | 4   | 49306725       | ENSDARG00000102735 | dkey-82i20.3                                 | NA                  |
| DMR4:49379001 | NA               | NA         | 4   | 49336148       | ENSDARG00000098306 | NA                                           | NA                  |
| DMR4:49421301 | dkey-82i20.3     | 100005493  | 4   | 49306725       | ENSDARG00000102735 | dkey-82i20.3                                 | NA                  |
| DMR4:49436801 | NA               | NA         | 4   | 49429387       | ENSDARG00000101729 | NA                                           | NA                  |
| DMR4:50122001 | dkey-22a18.1     | NA         | 4   | 50100997       | ENSDARG00000099626 | dkey-22a18.1                                 | NA                  |
| DMR4:51339401 | dkey-250k10.1    | NA         | 4   | 51338256       | ENSDARG00000102595 | dkey-250k10.1                                | NA                  |
| DMR4:51347901 | dkey-250k10.1    | NA         | 4   | 51338256       | ENSDARG00000102595 | dkey-250k10.1                                | NA                  |
| DMR4:51353101 | dkey-250k10.1    | NA         | 4   | 51338256       | ENSDARG00000102595 | dkey-250k10.1                                | NA                  |
| DMR4:52939601 | dkey-56m15.9     | NA         | 4   | 52931823       | ENSDARG00000103281 | dkey-56m15.9                                 | NA                  |
| DMR4:52956401 | dkey-56m15.9     | NA         | 4   | 52931823       | ENSDARG00000103281 | dkey-56m15.9                                 | NA                  |

|               |                  |           |   |          |                    |                                     |             |
|---------------|------------------|-----------|---|----------|--------------------|-------------------------------------|-------------|
| DMR4:53449201 | dkey-257e4.2     | NA        | 4 | 53436793 | ENSDARG00000101997 | dkey-257e4.2                        | NA          |
| DMR4:53590201 | ZFP28 (17 of 19) | NA        | 4 | 53577718 | ENSDARG00000103031 | ZFP28 zinc finger protein           | NA          |
| DMR4:54485701 | ch211-237a4.2    | NA        | 4 | 54459778 | ENSDARG00000098585 | ch211-237a4.2                       | NA          |
| DMR4:57066201 | ch211-233h3.1    | NA        | 4 | 57035021 | ENSDARG00000102439 | ch211-233h3.1                       | NA          |
| DMR4:57094301 | ch211-233h3.1    | NA        | 4 | 57035021 | ENSDARG00000102439 | ch211-233h3.1                       | NA          |
| DMR4:57106001 | ch211-233h3.1    | NA        | 4 | 57035021 | ENSDARG00000102439 | ch211-233h3.1                       | NA          |
| DMR4:57147501 | RNH1 (4 of 55)   | NA        | 4 | 57146255 | ENSDARG00000077697 | ribonuclease/angiogenin inhibitor 1 | Translation |
| DMR4:57147501 | ch211-241n15.1   | NA        | 4 | 57135167 | ENSDARG00000076255 | ch211-241n15.1                      | NA          |
| DMR4:57230701 | ch211-241n15.1   | NA        | 4 | 57135167 | ENSDARG00000076255 | ch211-241n15.1                      | NA          |
| DMR4:57308501 | ch211-241n15.1   | NA        | 4 | 57135167 | ENSDARG00000076255 | ch211-241n15.1                      | NA          |
| DMR4:57453101 | dkey-149m13.2    | NA        | 4 | 57437413 | ENSDARG00000094572 | dkey-149m13.2                       | NA          |
| DMR4:57635201 | 173710           | 569852    | 4 | 57611805 | ENSDARG00000078728 | 173710                              | NA          |
| DMR4:57782601 | dkey-196n19.2    | NA        | 4 | 57741506 | ENSDARG00000090734 | dkey-196n19.2                       | NA          |
| DMR4:57928701 | ch211-178j18.2   | NA        | 4 | 57902138 | ENSDARG00000092475 | ch211-178j18.2                      | NA          |
| DMR4:58020001 | ch211-178j18.4   | NA        | 4 | 58021494 | ENSDARG00000096024 | ch211-178j18.4                      | NA          |
| DMR4:58047101 | U1               | NA        | 4 | 58051432 | ENSDARG00000091853 | U1 spliceosomal RNA                 | Translation |
| DMR4:58063601 | U1               | NA        | 4 | 58077458 | ENSDARG00000090928 | U1 spliceosomal RNA                 | Translation |
| DMR4:58063601 | U1               | NA        | 4 | 58076153 | ENSDARG00000088668 | U1 spliceosomal RNA                 | Translation |
| DMR4:58063601 | U1               | NA        | 4 | 58070876 | ENSDARG00000091132 | U1 spliceosomal RNA                 | Translation |
| DMR4:58063601 | U1               | NA        | 4 | 58080073 | ENSDARG00000089029 | U1 spliceosomal RNA                 | Translation |
| DMR4:58063601 | U1               | NA        | 4 | 58066220 | ENSDARG00000087997 | U1 spliceosomal RNA                 | Translation |
| DMR4:58063601 | U1               | NA        | 4 | 58074749 | ENSDARG00000090006 | U1 spliceosomal RNA                 | Translation |
| DMR4:58063601 | U1               | NA        | 4 | 58073457 | ENSDARG00000091354 | U1 spliceosomal RNA                 | Translation |
| DMR4:58063601 | U1               | NA        | 4 | 58078769 | ENSDARG00000089332 | U1 spliceosomal RNA                 | Translation |
| DMR4:58063601 | U1               | NA        | 4 | 58072181 | ENSDARG00000088282 | U1 spliceosomal RNA                 | Translation |
| DMR4:58063601 | U1               | NA        | 4 | 58064915 | ENSDARG00000091196 | U1 spliceosomal RNA                 | Translation |
| DMR4:58063601 | U1               | NA        | 4 | 58081377 | ENSDARG00000088327 | U1 spliceosomal RNA                 | Translation |
| DMR4:58063601 | U1               | NA        | 4 | 58063605 | ENSDARG00000086219 | U1 spliceosomal RNA                 | Translation |
| DMR4:58063601 | U1               | NA        | 4 | 58069566 | ENSDARG00000088683 | U1 spliceosomal RNA                 | Translation |
| DMR4:58063601 | U1               | NA        | 4 | 58067718 | ENSDARG00000086900 | U1 spliceosomal RNA                 | Translation |
| DMR4:58271901 | BX465848.1       | NA        | 4 | 58235813 | ENSDARG00000104146 |                                     | NA          |
| DMR4:58271901 | dkey-248e17.9    | 100537855 | 4 | 58189793 | ENSDARG00000101524 | dkey-248e17.9                       | NA          |
| DMR4:58323301 | dkey-248e17.7    | NA        | 4 | 58323857 | ENSDARG00000099036 | dkey-248e17.7                       | NA          |
| DMR4:58323301 | dkey-248e17.9    | 100537855 | 4 | 58189793 | ENSDARG00000101524 | dkey-248e17.9                       | NA          |
| DMR4:58637101 | dkey-211i20.5    | NA        | 4 | 58629786 | ENSDARG00000105072 | dkey-211i20.5                       | NA          |
| DMR4:58637101 | dkey-211i20.2    | NA        | 4 | 58565040 | ENSDARG00000103003 | dkey-211i20.2                       | NA          |
| DMR4:58654201 | dkey-211i20.2    | NA        | 4 | 58565040 | ENSDARG00000103003 | dkey-211i20.2                       | NA          |
| DMR4:58668001 | dkey-211i20.2    | NA        | 4 | 58565040 | ENSDARG00000103003 | dkey-211i20.2                       | NA          |
| DMR4:58705601 | dkey-211i20.2    | NA        | 4 | 58565040 | ENSDARG00000103003 | dkey-211i20.2                       | NA          |
| DMR4:58720601 | dkey-211i20.2    | NA        | 4 | 58565040 | ENSDARG00000103003 | dkey-211i20.2                       | NA          |
| DMR4:58888201 | dkey-204i2.3     | NA        | 4 | 58842629 | ENSDARG00000093803 | dkey-204i2.3                        | NA          |
| DMR4:58954601 | dkey-204i2.3     | NA        | 4 | 58842629 | ENSDARG00000093803 | dkey-204i2.3                        | NA          |
| DMR4:58967201 | dkey-204i2.3     | NA        | 4 | 58842629 | ENSDARG00000093803 | dkey-204i2.3                        | NA          |
| DMR4:58969801 | dkey-204i2.3     | NA        | 4 | 58842629 | ENSDARG00000093803 | dkey-204i2.3                        | NA          |
| DMR4:59125101 | dkey-9p20.9      | NA        | 4 | 59126826 | ENSDARG00000092102 | dkey-9p20.9                         | NA          |
| DMR4:59125101 | dkey-9p20.8      | NA        | 4 | 59129413 | ENSDARG00000095433 | dkey-9p20.8                         | NA          |
| DMR4:59125101 | dkey-9p20.7      | NA        | 4 | 59131210 | ENSDARG00000095097 | dkey-9p20.7                         | NA          |
| DMR4:59125101 | dkey-9p20.6      | NA        | 4 | 59133007 | ENSDARG00000092010 | dkey-9p20.6                         | NA          |
| DMR4:59125101 | dkey-9p20.5      | NA        | 4 | 59134804 | ENSDARG00000093261 | dkey-9p20.5                         | NA          |
| DMR4:59125101 | dkey-9p20.4      | NA        | 4 | 59136601 | ENSDARG00000092156 | dkey-9p20.4                         | NA          |
| DMR4:59554401 | U1               | NA        | 4 | 59559693 | ENSDARG00000104060 | U1 spliceosomal RNA                 | Translation |
| DMR4:59554401 | U1               | NA        | 4 | 59557083 | ENSDARG00000103794 | U1 spliceosomal RNA                 | Translation |
| DMR4:59554401 | U1               | NA        | 4 | 59588403 | ENSDARG00000101376 | U1 spliceosomal RNA                 | Translation |
| DMR4:59554401 | U1               | NA        | 4 | 59568828 | ENSDARG00000099335 | U1 spliceosomal RNA                 | Translation |
| DMR4:59554401 | U1               | NA        | 4 | 59566218 | ENSDARG00000099671 | U1 spliceosomal RNA                 | Translation |
| DMR4:59554401 | U1               | NA        | 4 | 59560998 | ENSDARG00000101416 | U1 spliceosomal RNA                 | Translation |
| DMR4:59554401 | U1               | NA        | 4 | 59567523 | ENSDARG00000099992 | U1 spliceosomal RNA                 | Translation |
| DMR4:59554401 | U1               | NA        | 4 | 59570133 | ENSDARG00000101546 | U1 spliceosomal RNA                 | Translation |
| DMR4:59554401 | U1               | NA        | 4 | 59562303 | ENSDARG00000104796 | U1 spliceosomal RNA                 | Translation |
| DMR4:59554401 | U1               | NA        | 4 | 59585793 | ENSDARG00000100489 | U1 spliceosomal RNA                 | Translation |
| DMR4:59554401 | U1               | NA        | 4 | 59554481 | ENSDARG00000098307 | U1 spliceosomal RNA                 | Translation |
| DMR4:59554401 | U1               | NA        | 4 | 59555778 | ENSDARG00000100884 | U1 spliceosomal RNA                 | Translation |
| DMR4:59554401 | U1               | NA        | 4 | 59580573 | ENSDARG00000104151 | U1 spliceosomal RNA                 | Translation |
| DMR4:59554401 | U1               | NA        | 4 | 59571438 | ENSDARG00000102686 | U1 spliceosomal RNA                 | Translation |
| DMR4:59554401 | U1               | NA        | 4 | 59584488 | ENSDARG00000104001 | U1 spliceosomal RNA                 | Translation |
| DMR4:59554401 | U1               | NA        | 4 | 59579268 | ENSDARG00000103385 | U1 spliceosomal RNA                 | Translation |
| DMR4:59554401 | U1               | NA        | 4 | 59574048 | ENSDARG00000103387 | U1 spliceosomal RNA                 | Translation |
| DMR4:59554401 | U1               | NA        | 4 | 59583183 | ENSDARG00000101228 | U1 spliceosomal RNA                 | Translation |
| DMR4:59554401 | U1               | NA        | 4 | 59576658 | ENSDARG00000101153 | U1 spliceosomal RNA                 | Translation |

|               |                 |           |   |          |                    |                                     |             |
|---------------|-----------------|-----------|---|----------|--------------------|-------------------------------------|-------------|
| DMR4:59554401 | U1              | NA        | 4 | 59575353 | ENSDARG00000103325 | U1 spliceosomal RNA                 | Translation |
| DMR4:59554401 | U1              | NA        | 4 | 59581878 | ENSDARG00000104168 | U1 spliceosomal RNA                 | Translation |
| DMR4:59554401 | U1              | NA        | 4 | 59572743 | ENSDARG00000105216 | U1 spliceosomal RNA                 | Translation |
| DMR4:59554401 | U1              | NA        | 4 | 59564913 | ENSDARG00000103812 | U1 spliceosomal RNA                 | Translation |
| DMR4:59554401 | U1              | NA        | 4 | 59563608 | ENSDARG00000102231 | U1 spliceosomal RNA                 | Translation |
| DMR4:59554401 | U1              | NA        | 4 | 59589708 | ENSDARG00000098648 | U1 spliceosomal RNA                 | Translation |
| DMR4:59554401 | U1              | NA        | 4 | 59577963 | ENSDARG00000101993 | U1 spliceosomal RNA                 | Translation |
| DMR4:59554401 | U1              | NA        | 4 | 59587098 | ENSDARG00000101487 | U1 spliceosomal RNA                 | Translation |
| DMR4:59554401 | U1              | NA        | 4 | 59558388 | ENSDARG00000103990 | U1 spliceosomal RNA                 | Translation |
| DMR4:59779301 | dkey-199m13.1   | NA        | 4 | 59770725 | ENSDARG00000100335 | dkey-199m13.1                       | NA          |
| DMR4:59905301 | dkey-146c18.5   | NA        | 4 | 59889283 | ENSDARG00000098094 | dkey-146c18.5                       | NA          |
| DMR4:59925901 | RNH1 (37 of 55) | NA        | 4 | 59917259 | ENSDARG00000102212 | ribonuclease/angiogenin inhibitor 1 | Translation |
| DMR4:59925901 | dkey-146c18.5   | NA        | 4 | 59889283 | ENSDARG00000098094 | dkey-146c18.5                       | NA          |
| DMR4:59955601 | dkey-146c18.5   | NA        | 4 | 59889283 | ENSDARG00000098094 | dkey-146c18.5                       | NA          |
| DMR4:63181501 | dkey-9i5.5      | NA        | 4 | 63148826 | ENSDARG00000105217 | dkey-9i5.5                          | NA          |
| DMR4:63477901 | dkey-14o6.1     | NA        | 4 | 63458198 | ENSDARG00000098383 | dkey-14o6.1                         | NA          |
| DMR4:63477901 | ZFP28 (8 of 19) | NA        | 4 | 63430193 | ENSDARG00000098126 | ZFP28 zinc finger protein           | NA          |
| DMR4:64608901 | 174311          | 100126141 | 4 | 64539369 | ENSDARG00000099048 | 174311                              | NA          |
| DMR4:64608901 | 174311          | 100137121 | 4 | 64539369 | ENSDARG00000099048 | 174311                              | NA          |
| DMR4:64644301 | 174311          | 100126141 | 4 | 64539369 | ENSDARG00000099048 | 174311                              | NA          |
| DMR4:64644301 | 174311          | 100137121 | 4 | 64539369 | ENSDARG00000099048 | 174311                              | NA          |
| DMR4:66478801 | dkey-237g15.2   | NA        | 4 | 66451358 | ENSDARG00000100302 | dkey-237g15.2                       | NA          |
| DMR4:66478801 | dkey-16p6.1     | NA        | 4 | 66450508 | ENSDARG00000099262 | dkey-16p6.1                         | NA          |
| DMR4:66805101 | dkey-264f17.1   | NA        | 4 | 66796875 | ENSDARG00000100219 | dkey-264f17.1                       | NA          |
| DMR4:66805101 | dkey-264f17.5   | NA        | 4 | 66796189 | ENSDARG00000104502 | dkey-264f17.5                       | NA          |
| DMR4:67433401 | U1              | NA        | 4 | 67453741 | ENSDARG00000105257 | U1 spliceosomal RNA                 | Translation |
| DMR4:67433401 | U1              | NA        | 4 | 67437127 | ENSDARG00000102263 | U1 spliceosomal RNA                 | Translation |
| DMR4:67433401 | U1              | NA        | 4 | 67435849 | ENSDARG00000101603 | U1 spliceosomal RNA                 | Translation |
| DMR4:67433401 | U1              | NA        | 4 | 67457575 | ENSDARG00000099856 | U1 spliceosomal RNA                 | Translation |
| DMR4:67433401 | U1              | NA        | 4 | 67451185 | ENSDARG00000104723 | U1 spliceosomal RNA                 | Translation |
| DMR4:67433401 | U1              | NA        | 4 | 67440961 | ENSDARG00000103758 | U1 spliceosomal RNA                 | Translation |
| DMR4:67433401 | U1              | NA        | 4 | 67456297 | ENSDARG00000101440 | U1 spliceosomal RNA                 | Translation |
| DMR4:67433401 | U1              | NA        | 4 | 67439683 | ENSDARG00000105211 | U1 spliceosomal RNA                 | Translation |
| DMR4:67433401 | U1              | NA        | 4 | 67446073 | ENSDARG00000104772 | U1 spliceosomal RNA                 | Translation |
| DMR4:67433401 | U1              | NA        | 4 | 67452463 | ENSDARG00000104411 | U1 spliceosomal RNA                 | Translation |
| DMR4:67433401 | U1              | NA        | 4 | 67444795 | ENSDARG00000100852 | U1 spliceosomal RNA                 | Translation |
| DMR4:67433401 | U1              | NA        | 4 | 67438405 | ENSDARG00000102481 | U1 spliceosomal RNA                 | Translation |
| DMR4:67433401 | U1              | NA        | 4 | 67458853 | ENSDARG00000101834 | U1 spliceosomal RNA                 | Translation |
| DMR4:67433401 | U1              | NA        | 4 | 67447351 | ENSDARG00000103557 | U1 spliceosomal RNA                 | Translation |
| DMR4:67433401 | U1              | NA        | 4 | 67443517 | ENSDARG00000102979 | U1 spliceosomal RNA                 | Translation |
| DMR4:67433401 | U1              | NA        | 4 | 67455019 | ENSDARG00000104503 | U1 spliceosomal RNA                 | Translation |
| DMR4:67433401 | U1              | NA        | 4 | 67442239 | ENSDARG00000101570 | U1 spliceosomal RNA                 | Translation |
| DMR4:67433401 | U1              | NA        | 4 | 67448629 | ENSDARG00000102169 | U1 spliceosomal RNA                 | Translation |
| DMR4:67433401 | U1              | NA        | 4 | 67449907 | ENSDARG00000100841 | U1 spliceosomal RNA                 | Translation |
| DMR4:67491001 | ch211-120c15.2  | NA        | 4 | 67483655 | ENSDARG00000102819 | ch211-120c15.2                      | NA          |
| DMR4:67494501 | ch211-120c15.2  | NA        | 4 | 67483655 | ENSDARG00000102819 | ch211-120c15.2                      | NA          |
| DMR4:67506201 | ch211-120c15.2  | NA        | 4 | 67483655 | ENSDARG00000102819 | ch211-120c15.2                      | NA          |
| DMR4:67527001 | dkey-246j6.2    | NA        | 4 | 67518275 | ENSDARG00000098384 | dkey-246j6.2                        | NA          |
| DMR4:67527001 | ch211-120c15.2  | NA        | 4 | 67483655 | ENSDARG00000102819 | ch211-120c15.2                      | NA          |
| DMR4:67553101 | dkey-246j6.2    | NA        | 4 | 67518275 | ENSDARG00000098384 | dkey-246j6.2                        | NA          |
| DMR4:67553101 | ch211-120c15.2  | NA        | 4 | 67483655 | ENSDARG00000102819 | ch211-120c15.2                      | NA          |
| DMR4:67560501 | dkey-246j6.2    | NA        | 4 | 67518275 | ENSDARG00000098384 | dkey-246j6.2                        | NA          |
| DMR4:67560501 | ch211-120c15.2  | NA        | 4 | 67483655 | ENSDARG00000102819 | ch211-120c15.2                      | NA          |
| DMR4:67567601 | ch211-120c15.3  | 101885268 | 4 | 67567117 | ENSDARG00000101807 | ch211-120c15.3                      | NA          |
| DMR4:67567601 | dkey-246j6.2    | NA        | 4 | 67518275 | ENSDARG00000098384 | dkey-246j6.2                        | NA          |
| DMR4:67567601 | ch211-120c15.2  | NA        | 4 | 67483655 | ENSDARG00000102819 | ch211-120c15.2                      | NA          |
| DMR4:67615701 | ch211-120c15.2  | NA        | 4 | 67483655 | ENSDARG00000102819 | ch211-120c15.2                      | NA          |
| DMR4:67696201 | 174944          | NA        | 4 | 67686010 | ENSDARG00000105091 | 174944                              | NA          |
| DMR4:67751901 | dkey-238o14.6   | NA        | 4 | 67756436 | ENSDARG00000104561 | dkey-238o14.6                       | NA          |
| DMR4:67828601 | dkey-238o14.9   | 565962    | 4 | 67836797 | ENSDARG00000103307 | dkey-238o14.9                       | NA          |
| DMR4:67928701 | U1              | NA        | 4 | 67942851 | ENSDARG00000101801 | U1 spliceosomal RNA                 | Translation |
| DMR4:67928701 | U1              | NA        | 4 | 67961121 | ENSDARG00000104510 | U1 spliceosomal RNA                 | Translation |
| DMR4:67928701 | U1              | NA        | 4 | 67974171 | ENSDARG00000104971 | U1 spliceosomal RNA                 | Translation |
| DMR4:67928701 | U1              | NA        | 4 | 67957206 | ENSDARG00000104021 | U1 spliceosomal RNA                 | Translation |
| DMR4:67928701 | U1              | NA        | 4 | 67968951 | ENSDARG00000101241 | U1 spliceosomal RNA                 | Translation |
| DMR4:67928701 | U1              | NA        | 4 | 67941546 | ENSDARG00000099261 | U1 spliceosomal RNA                 | Translation |
| DMR4:67928701 | U1              | NA        | 4 | 67971561 | ENSDARG00000098156 | U1 spliceosomal RNA                 | Translation |
| DMR4:67928701 | U1              | NA        | 4 | 67948071 | ENSDARG00000100682 | U1 spliceosomal RNA                 | Translation |
| DMR4:67928701 | U1              | NA        | 4 | 67931133 | ENSDARG00000104464 | U1 spliceosomal RNA                 | Translation |

|               |                   |           |   |          |                    |                                                           |              |
|---------------|-------------------|-----------|---|----------|--------------------|-----------------------------------------------------------|--------------|
| DMR4:67928701 | U1                | NA        | 4 | 67949376 | ENSDARG00000102136 | U1 spliceosomal RNA                                       | Translation  |
| DMR4:67928701 | U1                | NA        | 4 | 67940241 | ENSDARG00000103168 | U1 spliceosomal RNA                                       | Translation  |
| DMR4:67928701 | U1                | NA        | 4 | 67967646 | ENSDARG00000103475 | U1 spliceosomal RNA                                       | Translation  |
| DMR4:67928701 | U1                | NA        | 4 | 67932411 | ENSDARG00000104909 | U1 spliceosomal RNA                                       | Translation  |
| DMR4:67928701 | U1                | NA        | 4 | 67950681 | ENSDARG00000103896 | U1 spliceosomal RNA                                       | Translation  |
| DMR4:67928701 | U1                | NA        | 4 | 67963731 | ENSDARG00000099012 | U1 spliceosomal RNA                                       | Translation  |
| DMR4:67928701 | U1                | NA        | 4 | 67946766 | ENSDARG00000103389 | U1 spliceosomal RNA                                       | Translation  |
| DMR4:67928701 | U1                | NA        | 4 | 67976781 | ENSDARG00000101854 | U1 spliceosomal RNA                                       | Translation  |
| DMR4:67928701 | U1                | NA        | 4 | 67958511 | ENSDARG00000102190 | U1 spliceosomal RNA                                       | Translation  |
| DMR4:67928701 | U1                | NA        | 4 | 67966341 | ENSDARG00000101031 | U1 spliceosomal RNA                                       | Translation  |
| DMR4:67928701 | U1                | NA        | 4 | 67935021 | ENSDARG00000104055 | U1 spliceosomal RNA                                       | Translation  |
| DMR4:67928701 | U1                | NA        | 4 | 67953291 | ENSDARG00000100579 | U1 spliceosomal RNA                                       | Translation  |
| DMR4:67928701 | U1                | NA        | 4 | 67929828 | ENSDARG00000098548 | U1 spliceosomal RNA                                       | Translation  |
| DMR4:67928701 | U1                | NA        | 4 | 67954596 | ENSDARG00000099041 | U1 spliceosomal RNA                                       | Translation  |
| DMR4:67928701 | U1                | NA        | 4 | 67944156 | ENSDARG00000100615 | U1 spliceosomal RNA                                       | Translation  |
| DMR4:67928701 | U1                | NA        | 4 | 67955901 | ENSDARG00000102485 | U1 spliceosomal RNA                                       | Translation  |
| DMR4:67928701 | U1                | NA        | 4 | 67937631 | ENSDARG00000098948 | U1 spliceosomal RNA                                       | Translation  |
| DMR4:67928701 | U1                | NA        | 4 | 67962426 | ENSDARG00000100937 | U1 spliceosomal RNA                                       | Translation  |
| DMR4:67928701 | U1                | NA        | 4 | 67975476 | ENSDARG00000100369 | U1 spliceosomal RNA                                       | Translation  |
| DMR4:67928701 | U1                | NA        | 4 | 67945461 | ENSDARG00000099296 | U1 spliceosomal RNA                                       | Translation  |
| DMR4:67928701 | U1                | NA        | 4 | 67951986 | ENSDARG00000100125 | U1 spliceosomal RNA                                       | Translation  |
| DMR4:67928701 | U1                | NA        | 4 | 67933716 | ENSDARG00000090218 | U1 spliceosomal RNA                                       | Translation  |
| DMR4:67928701 | U1                | NA        | 4 | 67970256 | ENSDARG00000104988 | U1 spliceosomal RNA                                       | Translation  |
| DMR4:67928701 | U1                | NA        | 4 | 67972866 | ENSDARG00000099734 | U1 spliceosomal RNA                                       | Translation  |
| DMR4:67928701 | U1                | NA        | 4 | 67936326 | ENSDARG00000100984 | U1 spliceosomal RNA                                       | Translation  |
| DMR4:67928701 | U1                | NA        | 4 | 67959816 | ENSDARG00000098814 | U1 spliceosomal RNA                                       | Translation  |
| DMR4:67928701 | U1                | NA        | 4 | 67965036 | ENSDARG00000103161 | U1 spliceosomal RNA                                       | Translation  |
| DMR4:67928701 | U1                | NA        | 4 | 67978060 | ENSDARG00000099341 | U1 spliceosomal RNA                                       | Translation  |
| DMR4:67928701 | U1                | NA        | 4 | 67938936 | ENSDARG00000103126 | U1 spliceosomal RNA                                       | Translation  |
| DMR4:68042201 | dkey-3h2.4        | NA        | 4 | 67990652 | ENSDARG00000098444 | dkey-3h2.4                                                | NA           |
| DMR4:68086601 | dkey-3h2.4        | NA        | 4 | 67990652 | ENSDARG00000098444 | dkey-3h2.4                                                | NA           |
| DMR4:68116701 | dkey-3h2.4        | NA        | 4 | 67990652 | ENSDARG00000098444 | dkey-3h2.4                                                | NA           |
| DMR4:68128701 | dkey-3h2.4        | NA        | 4 | 67990652 | ENSDARG00000098444 | dkey-3h2.4                                                | NA           |
| DMR4:68175701 | dkey-3h2.4        | NA        | 4 | 67990652 | ENSDARG00000098444 | dkey-3h2.4                                                | NA           |
| DMR4:68185601 | dkey-3h2.4        | NA        | 4 | 67990652 | ENSDARG00000098444 | dkey-3h2.4                                                | NA           |
| DMR4:68210601 | dkey-3h2.4        | NA        | 4 | 67990652 | ENSDARG00000098444 | dkey-3h2.4                                                | NA           |
| DMR4:68260701 | dkey-3h2.4        | NA        | 4 | 67990652 | ENSDARG00000098444 | dkey-3h2.4                                                | NA           |
| DMR4:68306001 | dkey-29j8.1       | NA        | 4 | 68290913 | ENSDARG00000101272 | dkey-29j8.1                                               | NA           |
| DMR4:68326801 | TRIM14 (24 of 28) | NA        | 4 | 68315077 | ENSDARG00000103371 | tripartite motif containing 14                            | NA           |
| DMR4:68702301 | dkey-28k24.2      | NA        | 4 | 68686839 | ENSDARG00000104787 | dkey-28k24.2                                              | NA           |
| DMR4:68804101 | dkey-254e13.6     | NA        | 4 | 68765919 | ENSDARG00000103324 | dkey-254e13.6                                             | NA           |
| DMR4:69312801 | ch211-76m11.3     | NA        | 4 | 69292827 | ENSDARG00000104890 | ch211-76m11.3                                             | NA           |
| DMR4:69312801 | ch211-76m11.5     | NA        | 4 | 69278330 | ENSDARG00000100006 | ch211-76m11.5                                             | NA           |
| DMR4:69312801 | ch211-76m11.11    | NA        | 4 | 69106827 | ENSDARG00000101828 | ch211-76m11.11                                            | NA           |
| DMR4:69367501 | ch211-76m11.8     | NA        | 4 | 69340358 | ENSDARG00000098305 | ch211-76m11.8                                             | NA           |
| DMR4:69367501 | ch211-76m11.3     | NA        | 4 | 69292827 | ENSDARG00000104890 | ch211-76m11.3                                             | NA           |
| DMR4:69367501 | ch211-76m11.5     | NA        | 4 | 69278330 | ENSDARG00000100006 | ch211-76m11.5                                             | NA           |
| DMR4:69367501 | ch211-76m11.11    | NA        | 4 | 69106827 | ENSDARG00000101828 | ch211-76m11.11                                            | NA           |
| DMR4:69450801 | ch211-76m11.5     | NA        | 4 | 69278330 | ENSDARG00000100006 | ch211-76m11.5                                             | NA           |
| DMR4:69450801 | ch211-76m11.11    | NA        | 4 | 69106827 | ENSDARG00000101828 | ch211-76m11.11                                            | NA           |
| DMR4:69458101 | ch211-76m11.5     | NA        | 4 | 69278330 | ENSDARG00000100006 | ch211-76m11.5                                             | NA           |
| DMR4:69458101 | ch211-76m11.11    | NA        | 4 | 69106827 | ENSDARG00000101828 | ch211-76m11.11                                            | NA           |
| DMR4:69461901 | ch211-76m11.5     | NA        | 4 | 69278330 | ENSDARG00000100006 | ch211-76m11.5                                             | NA           |
| DMR4:69461901 | ch211-76m11.11    | NA        | 4 | 69106827 | ENSDARG00000101828 | ch211-76m11.11                                            | NA           |
| DMR4:69498101 | ch211-76m11.5     | NA        | 4 | 69278330 | ENSDARG00000100006 | ch211-76m11.5                                             | NA           |
| DMR4:69498101 | ch211-76m11.11    | NA        | 4 | 69106827 | ENSDARG00000101828 | ch211-76m11.11                                            | NA           |
| DMR4:69560401 | dkey-27n6.4       | NA        | 4 | 69552224 | ENSDARG00000101757 | dkey-27n6.4                                               | NA           |
| DMR4:69675101 | dkeyp-4f2.1       | NA        | 4 | 69668871 | ENSDARG00000103781 | dkeyp-4f2.1                                               | NA           |
| DMR4:71674701 | 162958            | 334070    | 4 | 71652635 | ENSDARG00000091869 | 162958                                                    | NA           |
| DMR4:71674701 | 162958            | 799470    | 4 | 71652635 | ENSDARG00000091869 | 162958                                                    | NA           |
| DMR4:73395701 | PHF21B            | NA        | 4 | 73251704 | ENSDARG00000087887 | PHD finger protein 21B                                    | Protease     |
| DMR4:74622301 | ch211-106j21.5    | NA        | 4 | 74611258 | ENSDARG00000104966 | ch211-106j21.5                                            | NA           |
| DMR4:74622301 | dkey-261j11.2     | NA        | 4 | 74084251 | ENSDARG00000101551 | dkey-261j11.2                                             | NA           |
| DMR4:74622301 | 174944            | 103911006 | 4 | 74050132 | ENSDARG00000099327 | 174944                                                    | NA           |
| DMR4:76592301 | pacsin2           | 404601    | 4 | 76548382 | ENSDARG00000078014 | protein kinase C and casein kinase substrate in neurons 2 | Signaling    |
| DMR4:76592301 | terfa             | 192316    | 4 | 76587747 | ENSDARG00000039302 | telomeric repeat binding factor a                         | Development  |
| DMR4:76592301 | CKAP4             | 406549    | 4 | 76590519 | ENSDARG00000032405 | cytoskeleton-associated protein 4                         | Cytoskeleton |

|                |                |           |    |          |                     |                                                                                |               |
|----------------|----------------|-----------|----|----------|---------------------|--------------------------------------------------------------------------------|---------------|
| DMR5:433201    | thap1          | 692315    | 5  | 424738   | ENSDARG00000059020  | THAP domain containing - apoptosis associated protein 1                        | Apoptosis     |
| DMR7:19951901  | CU019646.1     | 794738    | 7  | 19895191 | ENSDARG00000036414  | Uncharacterized protein [Source:UniProtKB/TrEMBL;Acc:E7F0F4]                   | NA            |
| DMR8:52201101  | tcf7l1b        | 30556     | 8  | 52121215 | ENSDARG00000007369  | transcription factor 7-like 1b (T-cell specific - HMG-box)                     | Transcription |
| DMR8:52435501  | gins4          | 572562    | 8  | 52429014 | ENSDARG00000016044  | GIN5 complex subunit 4 (Sld5 homolog)                                          | NA            |
| DMR8:53196401  | cacna1db       | NA        | 8  | 53026462 | ENSDARG000000101589 | calcium channel - voltage-dependent - L type - alpha 1D subunit - b            | Signaling     |
| DMR9:53496501  | CABZ01054962.1 | 799204    | 9  | 53471604 | ENSDARG00000088672  | Uncharacterized protein                                                        | NA            |
| DMR10:6863601  | ppip5k2        | 449862    | 10 | 6822414  | ENSDARG00000078441  | diphosphoinositol pentakisphosphate kinase 2                                   | Signaling     |
| DMR11:27863601 | ch211-220m17.6 | 566750    | 11 | 27862229 | ENSDARG00000022570  | ch211-220m17.6                                                                 | NA            |
| DMR11:29151701 | arhgef10la     | 799435    | 11 | 29083968 | ENSDARG00000088630  | Rho guanine nucleotide exchange factor (GEF) 10-like a                         | Signaling     |
| DMR14:51898101 | atp6v0e1       | 450017    | 14 | 51855440 | ENSDARG00000101794  | ATPase - H+ transporting - lysosomal V0 subunit e1                             | Signaling     |
| DMR15:30691901 | msi2b          | 394084    | 15 | 30543904 | ENSDARG00000032614  | musashi RNA-binding protein 2b                                                 | Translation   |
| DMR15:39669001 | robo1          | 30769     | 15 | 39431053 | ENSDARG00000026784  | roundabout - axon guidance receptor - homolog 1 (Drosophila)                   | Receptor      |
| DMR15:39828301 | t2gtl4a        | NA        | 15 | 39782778 | ENSDARG00000094788  | tol2 transposon-derived gene trap locus 4A                                     | NA            |
| DMR15:39906501 | CR626875.1     | NA        | 15 | 39907939 | ENSDARG000000103175 |                                                                                | NA            |
| DMR15:39906501 | t2gtl4a        | NA        | 15 | 39782778 | ENSDARG00000094788  | tol2 transposon-derived gene trap locus 4A                                     | NA            |
| DMR15:47004301 | inpp1a         | NA        | 15 | 46988351 | ENSDARG000000104222 | inositol polyphosphate phosphatase-like 1a                                     | Signaling     |
| DMR16:36379601 | CR974440.1     | NA        | 16 | 36395410 | ENSDARG000000102416 | NA                                                                             | NA            |
| DMR17:50945101 | aqr            | 393436    | 17 | 50930341 | ENSDARG00000016775  | aquarius intron-binding spliceosomal factor                                    | Translation   |
| DMR17:51062001 | paplna         | 562930    | 17 | 51034383 | ENSDARG00000027867  | papilin a - proteoglycan-like sulfated glycoprotein                            | ECM           |
| DMR17:51144601 | trappc12       | 791162    | 17 | 51142175 | ENSDARG00000060101  | trafficking protein particle complex 12                                        | NA            |
| DMR20:5911101  | nrxn3b         | 570698    | 20 | 5518645  | ENSDARG00000062693  | neurexin 3b                                                                    | Receptor      |
| DMR21:18842201 | dkey-65l23.2   | 793688    | 21 | 18840494 | ENSDARG00000093234  | dkey-65l23.2                                                                   | NA            |
| DMR21:18842201 | dkey-65l23.1   | NA        | 21 | 18830340 | ENSDARG00000094538  | dkey-65l23.1                                                                   | NA            |
| DMR22:53601    | mrpl20         | 751640    | 22 | 19300    | ENSDARG00000090462  | mitochondrial ribosomal protein L20                                            | Translation   |
| DMR22:676601   | arl8a          | 567222    | 22 | 673036   | ENSDARG00000078686  | ADP-ribosylation factor-like 8A                                                | Signaling     |
| DMR22:3303901  | gipc3          | 724013    | 22 | 3284403  | ENSDARG00000053074  | GIPC PDZ domain containing family - member 3                                   | Metabolism    |
| DMR22:34701701 | CU896691.1     | NA        | 22 | 34657153 | ENSDARG00000087901  | Uncharacterized protein                                                        | NA            |
| DMR22:35403901 | HTR3C          | NA        | 22 | 35401647 | ENSDARG00000077959  | 5-hydroxytryptamine (serotonin) receptor 3C - ionotropic                       | Receptor      |
| DMR23:8733301  | rgs19          | 100170801 | 23 | 8671601  | ENSDARG00000077385  | regulator of G-protein signaling 19                                            | Signaling     |
| DMR23:39923401 | ppp1r14c       | 568055    | 23 | 39914946 | ENSDARG00000077341  | protein phosphatase 1 - regulatory (inhibitor) subunit 14C                     | Signaling     |
| DMR23:44716801 | eif4e2rs1      | 393732    | 23 | 44622538 | ENSDARG00000015835  | eukaryotic translation initiation factor 4E family member 2 related sequence 1 | Translation   |
| DMR23:44716801 | DLG4 (1 of 2)  | 100148055 | 23 | 44502592 | ENSDARG00000039385  | discs - large homolog 4 (Drosophila)                                           | Development   |
| DMR24:2446201  | rreb1a         | 338237    | 24 | 2350529  | ENSDARG00000063701  | ras responsive element binding protein 1a                                      | Signaling     |
