# Supplementary material for: Mercury-induced epigenetic transgenerational inheritance of abnormal neurobehavior is correlated with sperm epimutations in zebrafish
Source: PubMed Central journal article supplement (PMC5413066; doi:10.1371/journal.pone.0176155), 2017-05-02
Supplement: pone.0176155.s010.pdf [file pone.0176155.s010.pdf]

Supplemental Table S7

## F2 Sperm DMR Associated Genes

| DMR Name      | Gene Symbol        | Entrezgene | Chr | start_position | Ensembl #          | Gene Description                                             | Functional Category |
|---------------|--------------------|------------|-----|----------------|--------------------|--------------------------------------------------------------|---------------------|
| DMR1:138101   | f10                | 282670     | 1   | 135903         | ENSDARG00000088581 | coagulation factor X                                         | Protein Binding     |
| DMR1:138101   | PROZ (2 of 2)      | 558106     | 1   | 144284         | ENSDARG00000076900 | protein Z - vitamin K-dependent plasma glycoprotein          | NA                  |
| DMR1:138101   | f7i                | 282671     | 1   | 127250         | ENSDARG00000075827 | coagulation factor VIII                                      | Protein Binding     |
| DMR1:1820401  | PTGFRN (1 of 2)    | 101884699  | 1   | 1793237        | ENSDARG00000075505 | prostaglandin F2 receptor inhibitor                          | NA                  |
| DMR1:30600701 | rims1b             | 568486     | 1   | 30570770       | ENSDARG00000078902 | regulating synaptic membrane exocytosis 1b                   | NA                  |
| DMR1:30614301 | rims1b             | 568486     | 1   | 30570770       | ENSDARG00000078902 | regulating synaptic membrane exocytosis 1b                   | NA                  |
| DMR1:30638601 | rims1b             | 568486     | 1   | 30570770       | ENSDARG00000078902 | regulating synaptic membrane exocytosis 1b [                 | NA                  |
| DMR1:44449201 | mucms1             | NA         | 1   | 44448541       | ENSDARG00000069566 | mucin - multiple PTS and SEA group - member 1                | NA                  |
| DMR1:47308001 | cfap58             | 561732     | 1   | 47140387       | ENSDARG00000069435 | cilia and flagella associated protein 58                     | NA                  |
| DMR1:48885801 | ch211-281g13.5     | 100148091  | 1   | 48880007       | ENSDARG00000074052 | ch211-281g13.5                                               | NA                  |
| DMR1:54091401 | 136791             | 678565     | 1   | 54089292       | ENSDARG00000091320 | 136791                                                       | NA                  |
| DMR1:54259701 | crtac1a            | 559626     | 1   | 54256871       | ENSDARG00000059826 | cartilage acidic protein 1a                                  | NA                  |
| DMR1:54466201 | mb                 | 393558     | 1   | 54460292       | ENSDARG00000031952 | myoglobin                                                    | Binding Protein     |
| DMR1:54529001 | mri1               | 10002302   | 1   | 54513499       | ENSDARG00000075754 | methylthioribose-1-phosphate isomerase 1                     | Translation         |
| DMR1:54750201 | SIGLEC1 (24 of 51) | NA         | 1   | 54760763       | ENSDARG00000090329 | sialic acid binding Ig-like lectin 1 - sialoadhesin          | NA                  |
| DMR1:54750201 | SIGLEC1 (51 of 51) | NA         | 1   | 54752427       | ENSDARG00000103489 | sialic acid binding Ig-like lectin 1 - sialoadhesin          | NA                  |
| DMR1:54788101 | SIGLEC1 (51 of 51) | NA         | 1   | 54752427       | ENSDARG00000103489 | sialic acid binding Ig-like lectin 1 - sialoadhesin          | NA                  |
| DMR1:54966901 | dkey-9c18.12       | 100536772  | 1   | 54965547       | ENSDARG00000041399 | dkey-9c18.12                                                 | NA                  |
| DMR1:55989101 | CABZ01059415.2     | 100334082  | 1   | 55990642       | ENSDARG00000087345 | Uncharacterized protein                                      | NA                  |
| DMR1:57335801 | ch211-114l13.4     | 796740     | 1   | 57330427       | ENSDARG00000078246 | ch211-114l13.4                                               | NA                  |
| DMR1:57340601 | ch211-114l13.4     | 796740     | 1   | 57330427       | ENSDARG00000078246 | ch211-114l13.4                                               | NA                  |
| DMR1:57373101 | casplb             | 566185     | 1   | 57370077       | ENSDARG00000094433 | caspace b - like                                             | Apoptosis           |
| DMR2:1532301  | adgrl2b.1          | 101882597  | 2   | 1371893        | ENSDARG00000075899 | adhesion G protein-coupled receptor L2b - tandem duplicate 1 | ECM                 |
| DMR2:2001801  | pth1ra             | 30629      | 2   | 1947342        | ENSDARG00000020957 | parathyroid hormone 1 receptor a                             | Receptor            |
| DMR2:4909301  | tnk2b              | 559119     | 2   | 4888417        | ENSDARG00000104409 | tyrosine kinase - non-receptor - 2b                          | Signaling           |
| DMR2:4915001  | tnk2b              | 559119     | 2   | 4888417        | ENSDARG00000104409 | tyrosine kinase - non-receptor - 2b                          | Signaling           |
| DMR2:5487101  | DUSP18             | 100005114  | 2   | 5485182        | ENSDARG00000078598 | dual specificity phosphatase 18                              | Signaling           |
| DMR2:6025601  | tmem125b           | 797385     | 2   | 6022020        | ENSDARG00000075980 | transmembrane protein 125b                                   | NA                  |
| DMR2:6174001  | aldh9a1b           | 399481     | 2   | 6155489        | ENSDARG00000037061 | aldehyde dehydrogenase 9 family - member A1b                 | Metabolism          |
| DMR2:6392701  | otol1a             | 553759     | 2   | 6391757        | ENSDARG00000001771 | otolin 1a                                                    | NA                  |
| DMR2:6417001  | SMC6               | 557127     | 2   | 6409741        | ENSDARG00000058719 | structural maintenance of chromosomes 6                      | NA                  |
| DMR2:8129401  | ephb3a             | 30313      | 2   | 8125959        | ENSDARG00000031548 | eph receptor B3a                                             | Receptor            |
| DMR2:10654201 | scin1b             | 406363     | 2   | 10612980       | ENSDARG00000058348 | scinderin like b                                             | NA                  |
| DMR2:11311101 | lrrc53             | 101882576  | 2   | 11299712       | ENSDARG00000097415 | leucine rich repeat containing 53                            | NA                  |
| DMR2:34632601 | astn1              | 791157     | 2   | 34589765       | ENSDARG00000068323 | astrotactin 1                                                | NA                  |
| DMR2:44005601 | nlr5               | NA         | 2   | 43998985       | ENSDARG00000090699 | NOD-like receptor family B - member 5                        | NA                  |
| DMR2:56637701 | CABZ01024426.1     | NA         | 2   | 56641206       | ENSDARG00000011283 | Uncharacterized protein                                      | NA                  |
| DMR2:58874601 | PTPRM              | NA         | 2   | 58864898       | ENSDARG00000089172 | protein tyrosine phosphatase - receptor type - M             | Signaling           |
| DMR3:247801   | BX004816.2         | NA         | 3   | 254567         | ENSDARG00000069019 | Uncharacterized protein                                      | NA                  |
| DMR3:364001   | dkey-30g5.2        | NA         | 3   | 357563         | ENSDARG00000094838 | dkey-30g5.2                                                  | NA                  |
| DMR3:398501   | BX004816.4         | 100007517  | 3   | 402206         | ENSDARG00000080702 | Uncharacterized protein                                      | NA                  |
| DMR3:2308001  | ch211-254c8.1      | NA         | 3   | 2309078        | ENSDARG00000092176 | ch211-254c8.1                                                | NA                  |
| DMR3:2308001  | dkey-73p2.2        | NA         | 3   | 2282163        | ENSDARG00000087429 | dkey-73p2.2                                                  | NA                  |
| DMR3:3324801  | CR388047.1         | NA         | 3   | 3324452        | ENSDARG00000101705 | NA                                                           | NA                  |
| DMR3:4201201  | dkey-36h5.1        | NA         | 3   | 4189421        | ENSDARG00000044235 | dkey-36h5.1                                                  | NA                  |
| DMR3:4742901  | slc25a38a          | 767662     | 3   | 4733901        | ENSDARG00000059805 | solute carrier family 25 - member 38a                        | NA                  |
| DMR3:5784601  | 5S_rRNA            | NA         | 3   | 5787688        | ENSDARG00000085478 | 5S ribosomal RNA                                             | Translation         |
| DMR3:5802301  | TGFBR3L            | 100535410  | 3   | 5801330        | ENSDARG00000088795 | transforming growth factor - beta receptor III-like          | Receptor            |
| DMR3:5878601  | pkn1b              | 100007897  | 3   | 5868579        | ENSDARG00000062748 | protein kinase N1b                                           | Signaling           |
| DMR3:5887101  | pkn1b              | 100007897  | 3   | 5868579        | ENSDARG00000062748 | protein kinase N1b                                           | Signaling           |
| DMR3:5897901  | pkn1b              | 100007897  | 3   | 5868579        | ENSDARG00000062748 | protein kinase N1b                                           | Signaling           |
| DMR3:6323901  | ch73-144l3.2       | NA         | 3   | 6317624        | ENSDARG00000104099 | ch73-144l3.2                                                 | NA                  |
| DMR3:6469201  | ch211-12p12.4      | NA         | 3   | 6439777        | ENSDARG00000103806 | ch211-12p12.4                                                | NA                  |
| DMR3:6877601  | mast1b             | 796144     | 3   | 6835018        | ENSDARG00000088789 | microtubule associated serine/threonine kinase 1b            | Signaling           |
| DMR3:7581301  | 174234             | 798270     | 3   | 7577248        | ENSDARG00000102401 | 174234                                                       | NA                  |
| DMR3:7581301  | 174234             | 100538208  | 3   | 7577248        | ENSDARG00000102401 | 174234                                                       | NA                  |
| DMR3:7581301  | 158517             | NA         | 3   | 7492049        | ENSDARG00000104611 | 158517                                                       | NA                  |
| DMR3:7581301  | 113443             | 777726     | 3   | 7417227        | ENSDARG00000100803 | 113443                                                       | NA                  |
| DMR3:7925701  | hook2              | 394086     | 3   | 7877216        | ENSDARG00000099235 | hook microtubule-tethering protein 2                         | Cytoskeleton        |
| DMR3:7959301  | ubn2b              | 561642     | 3   | 7954040        | ENSDARG00000100508 | ubnuclein 2b                                                 | NA                  |
| DMR3:8006101  | ubn2b              | 561642     | 3   | 7954040        | ENSDARG00000100508 | ubnuclein 2b                                                 | NA                  |
| DMR3:8026501  | trim35-25          | 561511     | 3   | 8034371        | ENSDARG00000101055 | tripartite motif containing 35-25                            | NA                  |
| DMR3:8026501  | trim35-21          | 561579     | 3   | 8018550        | ENSDARG00000102303 | tripartite motif containing 35-21                            | NA                  |
| DMR3:8048501  | trim35-25          | 561511     | 3   | 8034371        | ENSDARG00000101055 | tripartite motif containing 35-25                            | NA                  |
| DMR3:8063401  | trim35-23          | 561453     | 3   | 8066950        | ENSDARG00000102368 | tripartite motif containing 35-23                            | NA                  |
| DMR3:8076201  | trim35-22          | 561381     | 3   | 8078766        | ENSDARG00000102264 | tripartite motif containing 35-22                            | NA                  |
| DMR3:8086001  | trim35-22          | 561381     | 3   | 8078766        | ENSDARG00000102264 | tripartite motif containing 35-22                            | NA                  |
| DMR3:8100101  | TRIM35 (28 of 38)  | 561314     | 3   | 8101271        | ENSDARG00000100721 | tripartite motif containing 35                               | NA                  |
| DMR3:8104701  | TRIM35 (28 of 38)  | 561314     | 3   | 8101271        | ENSDARG00000100721 | tripartite motif containing 35                               | NA                  |
| DMR3:8115901  | TRIM35 (26 of 38)  | NA         | 3   | 8120937        | ENSDARG00000100373 | tripartite motif containing 35                               | NA                  |
| DMR3:8126701  | TRIM35 (26 of 38)  | NA         | 3   | 8120937        | ENSDARG00000100373 | tripartite motif containing 35                               | NA                  |
| DMR3:8271901  | TRIM35 (9 of 38)   | 541547     | 3   | 8254194        | ENSDARG00000039108 | tripartite motif containing 35                               | NA                  |
| DMR3:8287501  | TRIM35 (9 of 38)   | 541547     | 3   | 8254194        | ENSDARG00000039108 | tripartite motif containing 35                               | NA                  |
| DMR3:8287501  | CABZ01019905.1     | NA         | 3   | 8294404        | ENSDARG00000100364 | NA                                                           | NA                  |
| DMR3:8418501  | ch73-322f21.2      | NA         | 3   | 8420015        | ENSDARG00000097075 | ch73-322f21.2                                                | NA                  |
| DMR3:8418501  | trim35-10          | 799678     | 3   | 8412853        | ENSDARG00000033071 | tripartite motif containing 35-10                            | NA                  |
| DMR3:12500901 | abca3b             | 564344     | 3   | 12440613       | ENSDARG00000100524 | ATP-binding cassette - sub-family A (ABC1) - member 3b       | Receptor            |
| DMR3:14007701 | ch211-108d22.2     | 793004     | 3   | 14007244       | ENSDARG00000097615 | ch211-108d22.2                                               | NA                  |
| DMR3:14011501 | ch211-108d22.2     | 793004     | 3   | 14007244       | ENSDARG00000097615 | ch211-108d22.2                                               | NA                  |
| DMR3:14015501 | ch211-108d22.2     | 793004     | 3   | 14007244       | ENSDARG00000097615 | ch211-108d22.2                                               | NA                  |

|               |                  |           |   |          |                    |                                                                              |                    |
|---------------|------------------|-----------|---|----------|--------------------|------------------------------------------------------------------------------|--------------------|
| DMR3:14081101 | 5S_rRNA          | NA        | 3 | 14094820 | ENSDARG00000091318 | 5S ribosomal RNA                                                             | Translation        |
| DMR3:14175401 | lppr2a           | 393428    | 3 | 14151274 | ENSDARG00000101478 | lipid phosphate phosphatase-related protein type 2a                          | Signaling          |
| DMR3:14217601 | lppr2a           | 393428    | 3 | 14151274 | ENSDARG00000101478 | lipid phosphate phosphatase-related protein type 2a                          | Signaling          |
| DMR3:14257601 | tmem56b          | 449652    | 3 | 14238210 | ENSDARG00000098224 | transmembrane protein 56b                                                    | NA                 |
| DMR3:21315301 | ch73-54a8.2      | NA        | 3 | 21248509 | ENSDARG00000097315 | ch73-54a8.2                                                                  | NA                 |
| DMR3:28391001 | 12-Sep           | 564600    | 3 | 28371577 | ENSDARG00000019191 | septin 12                                                                    | Cytoskeleton       |
| DMR3:28587101 | gsg1l            | 664746    | 3 | 28587975 | ENSDARG00000037390 | gsg1-like                                                                    | NA                 |
| DMR3:28587101 | dkey-20j1.2      | NA        | 3 | 28519125 | ENSDARG00000096409 | dkey-20j1.2                                                                  | NA                 |
| DMR3:30394101 | syt3             | 10000615  | 3 | 30384523 | ENSDARG00000075830 | synaptotagmin III                                                            | Protein Binding    |
| DMR3:30941901 | tceb2            | 192341    | 3 | 30938434 | ENSDARG00000037980 | transcription elongation factor B (SIII) - polypeptide 2                     | Transcription      |
| DMR3:30941901 | TCEB2 (2 of 2)   | NA        | 3 | 30935945 | ENSDARG00000097471 | transcription elongation factor B (SIII) - polypeptide 2 (18kDa - elongin B) | Transcription      |
| DMR3:31850101 | kcnc3a           | 559096    | 3 | 31821431 | ENSDARG00000055855 | potassium voltage-gated channel - Shaw-related subfamily - member 3a         | Transport          |
| DMR3:59892001 | xylt2            | 563446    | 3 | 59886578 | ENSDARG00000059557 | xylosyltransferase II                                                        | Metabolism         |
| DMR4:3494601  | grm8a            | 792371    | 4 | 3464722  | ENSDARG00000077654 | glutamate receptor - metabotropic 8a                                         | Receptor           |
| DMR4:4873301  | ptprz1b          | 553019    | 4 | 4825515  | ENSDARG00000020871 | protein tyrosine phosphatase - receptor-type - Z polypeptide 1b              | Signaling          |
| DMR4:29125001 | fb11h05          | 563440    | 4 | 28860207 | ENSDARG00000074009 | fb11h05                                                                      | NA                 |
| DMR4:29687601 | ch211-214c20.1   | NA        | 4 | 29666316 | ENSDARG00000088082 | ch211-214c20.1                                                               | NA                 |
| DMR4:29687601 | BX248122.1       | NA        | 4 | 29696528 | ENSDARG00000100661 |                                                                              | NA                 |
| DMR4:30277801 | RNH1 (6 of 55)   | 560084    | 4 | 30254666 | ENSDARG00000089582 | ribonuclease/angiogenin inhibitor 1                                          | Translation        |
| DMR4:39324201 | RNH1 (45 of 55)  | 571990    | 4 | 39287490 | ENSDARG00000103755 | ribonuclease/angiogenin inhibitor 1                                          | Translation        |
| DMR4:44703501 | dkey-256i11.2    | 557877    | 4 | 44666428 | ENSDARG00000093713 | dkey-256i11.2                                                                | NA                 |
| DMR4:44703501 | ch211-162i8.7    | NA        | 4 | 44507344 | ENSDARG00000096216 | ch211-162i8.7                                                                | NA                 |
| DMR4:51339201 | dkey-250k10.1    | NA        | 4 | 51338256 | ENSDARG00000102595 | dkey-250k10.1                                                                | NA                 |
| DMR4:51348201 | dkey-250k10.1    | NA        | 4 | 51338256 | ENSDARG00000102595 | dkey-250k10.1                                                                | NA                 |
| DMR4:52940101 | dkey-56m15.9     | NA        | 4 | 52931823 | ENSDARG00000103281 | dkey-56m15.9                                                                 | NA                 |
| DMR4:52956001 | dkey-56m15.9     | NA        | 4 | 52931823 | ENSDARG00000103281 | dkey-56m15.9                                                                 | NA                 |
| DMR4:67286701 | ch211-209j12.4   | 100333986 | 4 | 67142315 | ENSDARG00000099403 | ch211-209j12.4                                                               | NA                 |
| DMR4:67286701 | ch211-209j12.1   | NA        | 4 | 67271628 | ENSDARG00000101634 | ch211-209j12.1                                                               | NA                 |
| DMR4:67286701 |                  | NA        | 4 | 67272096 | ENSDARG00000101594 |                                                                              | NA                 |
| DMR4:69395401 | ch211-76m11.3    | NA        | 4 | 69292827 | ENSDARG00000104890 | ch211-76m11.3                                                                | NA                 |
| DMR4:69395401 | ch211-76m11.5    | NA        | 4 | 69278330 | ENSDARG00000100006 | ch211-76m11.5                                                                | NA                 |
| DMR4:69395401 | ch211-76m11.11   | NA        | 4 | 69106827 | ENSDARG00000101828 | ch211-76m11.11                                                               | NA                 |
| DMR4:70713201 | ftr64            | 562311    | 4 | 70704404 | ENSDARG00000101514 | finTRIM family - member 64                                                   | NA                 |
| DMR4:70945701 | CABZ01054394.4   | 101885937 | 4 | 70942037 | ENSDARG00000098324 |                                                                              | NA                 |
| DMR4:70945701 | CABZ01054394.2   | 103910994 | 4 | 70951709 | ENSDARG00000089715 | Uncharacterized protein                                                      | NA                 |
| DMR4:72074701 | BX855614.4       | 100333583 | 4 | 72069720 | ENSDARG00000103751 | NA                                                                           | NA                 |
| DMR4:72107201 | 171551           | 798325    | 4 | 72087887 | ENSDARG00000073708 | 171551                                                                       | NA                 |
| DMR4:72819201 | ptprb            | 100149130 | 4 | 72814552 | ENSDARG00000076624 | protein tyrosine phosphatase - receptor type - b                             | Signaling          |
| DMR4:72841601 | ptprb            | 100149130 | 4 | 72814552 | ENSDARG00000076624 | protein tyrosine phosphatase - receptor type - b                             | Signaling          |
| DMR4:72895901 | ptprb            | 100149130 | 4 | 72814552 | ENSDARG00000076624 | protein tyrosine phosphatase - receptor type - b                             | Signaling          |
| DMR4:74120701 | dkey-261j11.2    | NA        | 4 | 74084251 | ENSDARG00000101551 | dkey-261j11.2                                                                | NA                 |
| DMR4:74120701 | 174944           | 103911006 | 4 | 74050132 | ENSDARG00000099327 | 174944                                                                       | NA                 |
| DMR4:74120701 | RNH1 (53 of 55)  | NA        | 4 | 74109908 | ENSDARG00000104956 | ribonuclease/angiogenin inhibitor 1                                          | Translation        |
| DMR4:74129901 | dkey-261j11.2    | NA        | 4 | 74084251 | ENSDARG00000101551 | dkey-261j11.2                                                                | NA                 |
| DMR4:74129901 | 174944           | 103911006 | 4 | 74050132 | ENSDARG00000099327 | 174944                                                                       | NA                 |
| DMR4:74143101 | dkey-261j11.2    | NA        | 4 | 74084251 | ENSDARG00000101551 | dkey-261j11.2                                                                | NA                 |
| DMR4:74143101 | 174944           | 103911006 | 4 | 74050132 | ENSDARG00000099327 | 174944                                                                       | NA                 |
| DMR4:75006601 | ms4a17a.11       | 550363    | 4 | 74998757 | ENSDARG00000053561 | membrane-spanning 4-domains - subfamily A - member 17A.11                    | NA                 |
| DMR4:75342001 | NA               | NA        | 4 | 75309080 | ENSDARG00000089296 | NA                                                                           | NA                 |
| DMR4:75579501 | CU467646.4       | NA        | 4 | 75565209 | ENSDARG00000099945 |                                                                              | NA                 |
| DMR4:75579501 | dkey-240n22.7    | NA        | 4 | 75470342 | ENSDARG00000092241 | dkey-240n22.7                                                                | NA                 |
| DMR5:3638301  | MYO19            | 562279    | 5 | 3619704  | ENSDARG00000073761 | myosin XIX                                                                   | Mitochondria       |
| DMR5:3967401  | prdx4            | 570477    | 5 | 3965601  | ENSDARG00000069013 | peroxiredoxin 4                                                              | Electron Transport |
| DMR5:4188901  | PLA2G4C (3 of 4) | 100332119 | 5 | 4172490  | ENSDARG00000045982 | phospholipase A2 - group IVC (cytosolic - calcium-independent)               | Metabolism         |
| DMR5:4250601  | FO834898.1       | 101882086 | 5 | 4246450  | ENSDARG00000102152 | NA                                                                           | NA                 |
| DMR5:4281001  | FO834898.1       | 101882086 | 5 | 4246450  | ENSDARG00000102152 | NA                                                                           | NA                 |
| DMR5:4291501  | FO834898.1       | 101882086 | 5 | 4246450  | ENSDARG00000102152 | NA                                                                           | NA                 |
| DMR5:4394001  | angptl2a         | 569092    | 5 | 4372659  | ENSDARG00000024030 | angiopoietin-like 2a                                                         | Growth Factor      |
| DMR5:5272901  | TNC (2 of 2)     | 100149028 | 5 | 5215683  | ENSDARG00000078362 | tenascin C                                                                   | ECM                |
| DMR5:5986201  | tnks1bp1         | 497601    | 5 | 5953586  | ENSDARG00000068760 | tankyrase 1 binding protein 1                                                | Metabolism         |
| DMR5:6976301  | UNC5C (2 of 2)   | NA        | 5 | 6902191  | ENSDARG00000099133 | unc-5 homolog C (C. elegans)                                                 | Development        |
| DMR5:7035501  | bmpr1ba          | 30742     | 5 | 6996909  | ENSDARG00000104100 | bone morphogenetic protein receptor - type Iba                               | Receptor           |
| DMR5:7069901  | ANGPTL2 (3 of 3) | 100536883 | 5 | 7071316  | ENSDARG00000098596 | angiopoietin-like 2                                                          | Growth Factor      |
| DMR5:7069901  | bmpr1ba          | 30742     | 5 | 6996909  | ENSDARG00000104100 | bone morphogenetic protein receptor - type Iba                               | Receptor           |
| DMR5:7178001  | bmpr1ba          | 30742     | 5 | 6996909  | ENSDARG00000104100 | bone morphogenetic protein receptor - type Iba                               | Receptor           |
| DMR5:8967401  | gak              | 100151158 | 5 | 8936560  | ENSDARG00000090654 | cyclin G associated kinase                                                   | Signaling          |
| DMR5:8971701  | gak              | 100151158 | 5 | 8936560  | ENSDARG00000090654 | cyclin G associated kinase                                                   | Signaling          |
| DMR5:8995601  | gak              | 100151158 | 5 | 8936560  | ENSDARG00000090654 | cyclin G associated kinase                                                   | Signaling          |
| DMR5:13216101 | mxd1             | 570082    | 5 | 13206742 | ENSDARG00000032039 | MAX dimerization protein 1                                                   | Transcription      |
| DMR5:13667801 | npffr1l2         | 570189    | 5 | 13665350 | ENSDARG00000062631 | neuropeptide FF receptor 1 like 2                                            | Receptor           |
| DMR5:19369301 | tchp             | 678595    | 5 | 19363994 | ENSDARG00000035605 | trichoplein - keratin filament binding                                       | Cytoskeleton       |
| DMR5:19830401 | coro1ca          | 317741    | 5 | 19815719 | ENSDARG00000035598 | coronin - actin binding protein - 1Ca                                        | Cytoskeleton       |
| DMR5:59962201 | tmem132e         | 564044    | 5 | 59845417 | ENSDARG00000090830 | transmembrane protein 132E                                                   | NA                 |
| DMR5:60584201 | doc2b            | NA        | 5 | 60249798 | ENSDARG00000088293 | double C2-like domains - beta                                                | Metabolism         |
| DMR5:60588801 | doc2b            | NA        | 5 | 60249798 | ENSDARG00000088293 | double C2-like domains - beta                                                | Metabolism         |
| DMR5:64357401 | pmpca            | 492801    | 5 | 64344144 | ENSDARG00000102607 | peptidase (mitochondrial processing) alpha                                   | Protease           |
| DMR5:64364101 | pmpca            | 492801    | 5 | 64344144 | ENSDARG00000102607 | peptidase (mitochondrial processing) alpha                                   | Protease           |
| DMR5:66964801 | zbtb20           | 568779    | 5 | 66854811 | ENSDARG00000005586 | zinc finger and BTB domain containing 20                                     | Transcription      |
| DMR5:67041601 | arhgap31         | 101885883 | 5 | 66992838 | ENSDARG00000059472 | Rho GTPase activating protein 31                                             | Signaling          |
| DMR5:67061901 | b4galt4          | 492760    | 5 | 67057417 | ENSDARG00000104042 | UDP-Gal:betaGlcNAc beta 1-4- galactosyltransferase - polypeptide 4           | Metabolism         |
| DMR5:67301801 | gtf3aa           | 445389    | 5 | 67302476 | ENSDARG00000030267 | general transcription factor IIIAa                                           | Transcription      |

|               |                  |           |    |          |                    |                                                                                                   |                |
|---------------|------------------|-----------|----|----------|--------------------|---------------------------------------------------------------------------------------------------|----------------|
| DMR5:67401401 | slc25a11         | 415189    | 5  | 67397951 | ENSDARG00000035741 | solute carrier family 25 (mitochondrial carrier; oxoglutarate carrier) - member 11                | Mitochondria   |
| DMR5:67408901 | slc25a11         | 415189    | 5  | 67397951 | ENSDARG00000035741 | solute carrier family 25 (mitochondrial carrier; oxoglutarate carrier) - member 11                | Mitochondria   |
| DMR5:69209001 | ch211-154e10.1   | NA        | 5  | 69208901 | ENSDARG00000094605 | ch211-154e10.1                                                                                    | NA             |
| DMR5:70970501 | gpsm1b           | NA        | 5  | 70956674 | ENSDARG00000054874 | G-protein signaling modulator 1b                                                                  | Signaling      |
| DMR5:71172001 | nup214           | NA        | 5  | 71099967 | ENSDARG00000016212 | nucleoporin 214                                                                                   | Nuclear Matrix |
| DMR5:71201101 | fam78ab          | 10002878  | 5  | 71198499 | ENSDARG00000088222 | family with sequence similarity 78 - member Ab                                                    | NA             |
| DMR5:71456001 | ddx54            | 286777    | 5  | 71409979 | ENSDARG00000105286 | DEAD (Asp-Glu-Ala-Asp) box polypeptide 54                                                         | Transcription  |
| DMR5:71582301 | ddx54            | 286777    | 5  | 71409979 | ENSDARG00000105286 | DEAD (Asp-Glu-Ala-Asp) box polypeptide 54                                                         | Transcription  |
| DMR6:36138801 | ch211-205j18.1   | NA        | 6  | 36138810 | ENSDARG00000097518 | ch211-205j18.1                                                                                    | NA             |
| DMR6:37840601 | herc2            | NA        | 6  | 37774880 | ENSDARG00000073841 | HECT and RLD domain containing E3 ubiquitin protein ligase 2                                      | Metabolism     |
| DMR6:41535401 | hemk1            | 560620    | 6  | 41512599 | ENSDARG00000078894 | HemK methyltransferase family member 1                                                            | Metabolism     |
| DMR6:48370601 | mov10a           | 566858    | 6  | 48349656 | ENSDARG00000015829 | Mov10 RISC complex RNA helicase a                                                                 | NA             |
| DMR6:59227701 | fam210b          | 619270    | 6  | 58922776 | ENSDARG00000052638 | family with sequence similarity 210 - member B                                                    | NA             |
| DMR6:59227701 | shmt2            | 100144628 | 6  | 59204233 | ENSDARG00000104414 | serine hydroxymethyltransferase 2 (mitochondrial)                                                 | Metabolism     |
| DMR6:59314501 | fam210b          | 619270    | 6  | 58922776 | ENSDARG00000052638 | family with sequence similarity 210 - member B                                                    | NA             |
| DMR6:59329201 | fam210b          | 619270    | 6  | 58922776 | ENSDARG00000052638 | family with sequence similarity 210 - member B                                                    | NA             |
| DMR6:59339901 | fam210b          | 619270    | 6  | 58922776 | ENSDARG00000052638 | family with sequence similarity 210 - member B                                                    | NA             |
| DMR6:59349401 | fam210b          | 619270    | 6  | 58922776 | ENSDARG00000052638 | family with sequence similarity 210 - member B                                                    | NA             |
| DMR6:59740801 | NUFIP1           | NA        | 6  | 59739185 | ENSDARG00000101024 | nuclear fragile X mental retardation protein interacting protein 1                                | NA             |
| DMR6:59951801 | pmepa1           | 436853    | 6  | 59814875 | ENSDARG00000039325 | prostate transmembrane protein - androgen induced 1                                               | NA             |
| DMR6:59951801 | kdm6a1           | 569207    | 6  | 59922011 | ENSDARG00000059794 | lysine (K)-specific demethylase 6A - like                                                         | NA             |
| DMR7:3622201  | ch211-282j17.11  | 557100    | 7  | 3619727  | ENSDARG00000042752 | ch211-282j17.11                                                                                   | NA             |
| DMR7:3622201  | ch211-282j17.10  | 557030    | 7  | 3608933  | ENSDARG00000070850 | ch211-282j17.10                                                                                   | NA             |
| DMR7:47553201 | ch211-186j3.6    | 556807    | 7  | 47143275 | ENSDARG00000078088 | ch211-186j3.6                                                                                     | NA             |
| DMR7:53854501 | csn1g1           | 494092    | 7  | 53831696 | ENSDARG00000104342 | casein kinase 1 - gamma 1                                                                         | Signaling      |
| DMR7:53972301 | pacsin3          | 393964    | 7  | 53952504 | ENSDARG00000099339 | protein kinase C and casein kinase substrate in neurons 3                                         | Signaling      |
| DMR7:54351401 | fgf4             | 570435    | 7  | 54347408 | ENSDARG00000105230 | fibroblast growth factor 4                                                                        | Growth Factor  |
| DMR7:54351401 | ch211-96b20.2    | NA        | 7  | 54339827 | ENSDARG00000098634 | ch211-96b20.2                                                                                     | NA             |
| DMR7:56172201 | sult5a1          | 767718    | 7  | 56128616 | ENSDARG00000007769 | sulfotransferase family 5A - member 1                                                             | Metabolism     |
| DMR7:56172201 | ist1             | 321460    | 7  | 56171157 | ENSDARG00000051888 | increased sodium tolerance 1 homolog (yeast)                                                      | NA             |
| DMR7:59082601 | SEMA4F           | NA        | 7  | 59032057 | ENSDARG00000100308 | sema domain - immunoglobulin domain (Ig) - transmembrane domain (TM) and short cytoplasmic domain | Signaling      |
| DMR7:59099201 | SEMA4F           | NA        | 7  | 59032057 | ENSDARG00000100308 | sema domain - immunoglobulin domain (Ig) - transmembrane domain (TM) and short cytoplasmic domain | Signaling      |
| DMR7:60200401 | pcxb             | 58068     | 7  | 60151878 | ENSDARG00000051939 | pyruvate carboxylase b                                                                            | Metabolism     |
| DMR7:60330301 | pcxb             | 58068     | 7  | 60151878 | ENSDARG00000051939 | pyruvate carboxylase b                                                                            | Metabolism     |
| DMR7:64599101 | MMP15 (1 of 2)   | 100332426 | 7  | 64569906 | ENSDARG00000013072 | matrix metalloproteinase 15 (membrane-inserted)                                                   | Protease       |
| DMR8:30671801 | adora2aa         | 561701    | 8  | 30654845 | ENSDARG00000033706 | adenosine A2a receptor a                                                                          | Receptor       |
| DMR8:30711401 | upb1             | 322660    | 8  | 30690197 | ENSDARG00000011521 | ureidopropionase - beta                                                                           | Metabolism     |
| DMR8:44636501 | grk5l            | 567452    | 8  | 44629634 | ENSDARG00000078815 | G protein-coupled receptor kinase 5 like                                                          | Signaling      |
| DMR8:46092501 | mtor             | 324254    | 8  | 46069730 | ENSDARG00000053196 | mechanistic target of rapamycin (serine/threonine kinase)                                         | Signaling      |
| DMR8:46244801 | mtor             | 324254    | 8  | 46069730 | ENSDARG00000053196 | mechanistic target of rapamycin (serine/threonine kinase)                                         | Signaling      |
| DMR8:46527701 | ch211-196g2.7    | NA        | 8  | 46529014 | ENSDARG00000088067 | ch211-196g2.7                                                                                     | NA             |
| DMR8:46527701 | sult1st3         | 368270    | 8  | 46505998 | ENSDARG00000018361 | sulfotransferase family 1 - cytosolic sulfotransferase 3                                          | Metabolism     |
| DMR8:47333201 | pex10            | 449821    | 8  | 47329338 | ENSDARG00000041511 | peroxisomal biogenesis factor 10                                                                  | Metabolism     |
| DMR8:48309801 | PRDM16           | NA        | 8  | 48106771 | ENSDARG00000078324 | PR domain containing 16                                                                           | NA             |
| DMR8:48794601 | ch211-278p7.5    | NA        | 8  | 48790192 | ENSDARG00000090171 | ch211-278p7.5                                                                                     | NA             |
| DMR8:48902001 | tp73             | 368221    | 8  | 48859431 | ENSDARG00000017953 | tumor protein p73                                                                                 | Transcription  |
| DMR8:48999401 | aak1a            | 568999    | 8  | 48976998 | ENSDARG00000011855 | AP2 associated kinase 1a                                                                          | Signaling      |
| DMR8:49121501 | GOLM1            | 393249    | 8  | 49103270 | ENSDARG00000025858 | golgi membrane protein 1                                                                          | Golgi          |
| DMR8:53196501 | cacna1db         | NA        | 8  | 53026462 | ENSDARG00000101589 | calcium channel - voltage-dependent - L type - alpha 1D subunit - b                               | Signaling      |
| DMR9:4770701  | fmln2a           | 100006456 | 9  | 4764057  | ENSDARG00000012586 | formin-like 2a                                                                                    | Cytoskeleton   |
| DMR9:19846401 | pdxka            | 791775    | 9  | 19812494 | ENSDARG00000088959 | pyridoxal (pyridoxine - vitamin B6) kinase a                                                      | Metabolism     |
| DMR9:19903201 | ch211-141e20.5   | NA        | 9  | 19904713 | ENSDARG00000092425 | ch211-141e20.5                                                                                    | NA             |
| DMR9:19903201 | ch211-141e20.2   | NA        | 9  | 19870700 | ENSDARG00000093349 | ch211-141e20.2                                                                                    | NA             |
| DMR9:19936801 | ch211-141e20.6   | NA        | 9  | 19939482 | ENSDARG00000091958 | ch211-141e20.6                                                                                    | NA             |
| DMR9:19936801 | ch211-141e20.2   | NA        | 9  | 19870700 | ENSDARG00000093349 | ch211-141e20.2                                                                                    | NA             |
| DMR9:23333701 | lypd6b           | 554606    | 9  | 23329427 | ENSDARG00000077643 | LY6/PLAUR domain containing 6B                                                                    | NA             |
| DMR9:23490701 | tmem163a         | 564964    | 9  | 23444374 | ENSDARG00000079858 | transmembrane protein 163a                                                                        | NA             |
| DMR9:24526901 | tmef2a           | 100004613 | 9  | 24438315 | ENSDARG00000051824 | transmembrane protein with EGF-like and two follistatin-like domains 2a                           | NA             |
| DMR9:24736901 | 5S_rRNA          | NA        | 9  | 24737010 | ENSDARG00000080950 | 5S ribosomal RNA                                                                                  | Translation    |
| DMR9:26576901 | dkey-111i23.1    | 100537093 | 9  | 26388755 | ENSDARG00000094811 | dkey-111i23.1                                                                                     | NA             |
| DMR9:43671001 | zfn385b          | 368405    | 9  | 43437937 | ENSDARG00000006065 | zinc finger protein 385B                                                                          | Transcription  |
| DMR9:50157501 | ttc21b           | 569823    | 9  | 50111092 | ENSDARG00000012368 | tetratricopeptide repeat domain 21B                                                               | NA             |
| DMR9:50379601 | COBL1L2 (2 of 2) | 100332245 | 9  | 50347321 | ENSDARG00000102829 | cordón-bleu WH2 repeat protein-like 1                                                             | NA             |
| DMR9:51915301 | NA               | NA        | 9  | 51916345 | ENSDARG00000103688 | NA                                                                                                | NA             |
| DMR9:52799301 | nme8             | 103911697 | 9  | 52796547 | ENSDARG00000102567 | NA                                                                                                | NA             |
| DMR9:52892901 | nme8             | 100037319 | 9  | 52872158 | ENSDARG00000098944 | NME/NM23 family member 8                                                                          | NA             |
| DMR9:52892901 | smarcal1         | 560412    | 9  | 52812379 | ENSDARG00000102265 | SWI/SNF related - matrix associated - actin dependent regulator of chromatin - subfamily a-like 1 | Epigenetic     |
| DMR9:54539001 | frmpd4           | 403129    | 9  | 54510852 | ENSDARG00000075685 | FERM and PDZ domain containing 4                                                                  | Signaling      |
| DMR9:55347801 | glra2            | NA        | 9  | 55334456 | ENSDARG00000075012 | glycine receptor - alpha 2                                                                        | Receptor       |
| DMR9:55370401 | fancb            | NA        | 9  | 55367242 | ENSDARG00000067596 | Fanconi anemia - complementation group B                                                          | NA             |
| DMR9:56011201 | edar             | 796370    | 9  | 55999636 | ENSDARG00000099088 | ectodysplasin A receptor                                                                          | Receptor       |
| DMR10:1817601 | apc              | 386762    | 10 | 1822160  | ENSDARG00000058868 | adenomatous polyposis coli                                                                        | Cytoskeleton   |
| DMR10:3196401 | pi4kaa           | 556956    | 10 | 3185947  | ENSDARG00000076724 | phosphatidylinositol 4-kinase - catalytic - alpha a                                               | Signaling      |
| DMR10:3220601 | pi4kaa           | 556956    | 10 | 3185947  | ENSDARG00000076724 | phosphatidylinositol 4-kinase - catalytic - alpha a                                               | Signaling      |
| DMR10:3224801 | pi4kaa           | 556956    | 10 | 3185947  | ENSDARG00000076724 | phosphatidylinositol 4-kinase - catalytic - alpha a                                               | Signaling      |
| DMR10:3286701 | slc25a1b         | 795332    | 10 | 3269207  | ENSDARG00000076381 | slc25a1 solute carrier family 25 (mitochondrial carrier; citrate transporter) - member 1b         | NA             |

|                |                  |           |    |          |                    |                                                                                    |               |
|----------------|------------------|-----------|----|----------|--------------------|------------------------------------------------------------------------------------|---------------|
| DMR10:7154301  | psd3l            | NA        | 10 | 7038821  | ENSDARG00000104820 | pleckstrin and Sec7 domain containing 3 - like                                     | Signaling     |
| DMR10:7963401  | osbp2            | 794414    | 10 | 7958020  | ENSDARG00000053487 | oxysterol binding protein 2                                                        | Receptor      |
| DMR10:8034801  | atp6v0a2a        | 561469    | 10 | 8030046  | ENSDARG00000035538 | ATPase - H+ transporting - lysosomal V0 subunit a2a                                | Metabolism    |
| DMR10:8160001  | pstpip2          | 100537857 | 10 | 8142980  | ENSDARG00000089569 | proline-serine-threonine phosphatase interacting protein 2                         | Signaling     |
| DMR10:8217601  | DHX29            | 553505    | 10 | 8196016  | ENSDARG00000040326 | DEAH (Asp-Glu-Ala-His) box polypeptide 29                                          | NA            |
| DMR10:10460601 | sardh            | 394103    | 10 | 10429090 | ENSDARG00000058102 | sarcosine dehydrogenase                                                            | Metabolism    |
| DMR10:10471301 | sardh            | 394103    | 10 | 10429090 | ENSDARG00000058102 | sarcosine dehydrogenase                                                            | Metabolism    |
| DMR10:15026401 | dkey-88116.3     | NA        | 10 | 15024858 | ENSDARG00000094055 | dkey-88116.3                                                                       | NA            |
| DMR10:15787501 | BX629350.3       | NA        | 10 | 15789429 | ENSDARG00000099062 | NA                                                                                 | NA            |
| DMR10:17582401 | dkey-76p7.7      | NA        | 10 | 17576176 | ENSDARG00000095267 | dkey-76p7.7                                                                        | NA            |
| DMR10:17582401 | slc2a11l         | 564849    | 10 | 17528511 | ENSDARG00000062873 | solute carrier family 2 (facilitated glucose transporter) - member 11-like         | Transport     |
| DMR10:21842801 | pcdh1gb2         | 503573    | 10 | 21719677 | ENSDARG00000101307 | protocadherin 1 gamma b 2                                                          | ECM           |
| DMR10:21842801 | pcdh1g3          | 553987    | 10 | 21703066 | ENSDARG00000099646 | protocadherin 1 gamma 3                                                            | ECM           |
| DMR10:21842801 | pcdh1g18         | 554005    | 10 | 21780364 | ENSDARG00000099447 | protocadherin 1 gamma 18                                                           | ECM           |
| DMR10:21842801 | pcdh1gc5         | 503571    | 10 | 21832573 | ENSDARG00000104826 | protocadherin 1 gamma c 5                                                          | ECM           |
| DMR10:21842801 | pcdh1g9          | NA        | 10 | 21744170 | ENSDARG00000057519 | protocadherin 1 gamma 9                                                            | ECM           |
| DMR10:21842801 | pcdh1gb9         | 553940    | 10 | 21761087 | ENSDARG00000088475 | protocadherin 1 gamma b 9                                                          | ECM           |
| DMR10:21842801 | pcdh1g11         | NA        | 10 | 21751082 | ENSDARG00000101665 | protocadherin 1 gamma 11                                                           | ECM           |
| DMR10:21842801 | pcdh1gc6         | 503572    | 10 | 21836289 | ENSDARG00000103950 | protocadherin 1 gamma c 6                                                          | ECM           |
| DMR10:21842801 | 162322           | 100003438 | 10 | 21825832 | ENSDARG00000099035 | 162322                                                                             | NA            |
| DMR10:21842801 | pcdh1g26         | 554012    | 10 | 21829275 | ENSDARG00000099931 | protocadherin 1 gamma 26                                                           | ECM           |
| DMR10:21842801 | pcdh1g1          | 553983    | 10 | 21693447 | ENSDARG00000104007 | protocadherin 1 gamma 1                                                            | ECM           |
| DMR10:21842801 | pcdh1g2          | 553986    | 10 | 21699273 | ENSDARG00000101232 | protocadherin 1 gamma 2                                                            | ECM           |
| DMR10:21842801 | pcdh1g30         | 554014    | 10 | 21843649 | ENSDARG00000101865 | protocadherin 1 gamma 30                                                           | ECM           |
| DMR10:21842801 | pcdh1g29         | 554013    | 10 | 21839895 | ENSDARG00000104497 | protocadherin 1 gamma 29                                                           | ECM           |
| DMR10:21842801 | pcdh1g22         | 323975    | 10 | 21819530 | ENSDARG00000103013 | protocadherin 1 gamma 22                                                           | ECM           |
| DMR10:22833001 | pcolcea          | 563867    | 10 | 22819881 | ENSDARG00000056913 | procollagen C-endopeptidase enhancer a                                             | Protease      |
| DMR10:25871301 | trpc4a           | 102725537 | 10 | 25867549 | ENSDARG00000070507 | transient receptor potential cation channel - subfamily C - member 4a              | Transport     |
| DMR10:26248701 | arfip2b          | 550342    | 10 | 26244066 | ENSDARG00000056664 | ADP-ribosylation factor interacting protein 2b                                     | Translation   |
| DMR10:27192001 | cxadr            | 791793    | 10 | 27134330 | ENSDARG00000043658 | coxsaackie virus and adenovirus receptor                                           | Receptor      |
| DMR10:32594301 | mogat2           | 450063    | 10 | 32590949 | ENSDARG00000019228 | monoacylglycerol O-acyltransferase 2                                               | Metabolism    |
| DMR10:32607101 | mogat2           | 450063    | 10 | 32590949 | ENSDARG00000019228 | monoacylglycerol O-acyltransferase 2                                               | Metabolism    |
| DMR10:32665001 | mogat2           | 450063    | 10 | 32590949 | ENSDARG00000019228 | monoacylglycerol O-acyltransferase 2                                               | Metabolism    |
| DMR10:33225101 | myl10            | 550569    | 10 | 33227953 | ENSDARG00000062592 | myosin - light chain 10 - regulatory                                               | Cytoskeleton  |
| DMR10:34645101 | nbeaa            | 541373    | 10 | 34482439 | ENSDARG00000070080 | neurobeachin a                                                                     | Development   |
| DMR10:37363101 | n1fb             | 564518    | 10 | 37324870 | ENSDARG00000004184 | neurofibromin 1b                                                                   | Development   |
| DMR10:38708701 | mmp30            | 678531    | 10 | 38700055 | ENSDARG00000045887 | matrix metalloproteinase 30                                                        | Protease      |
| DMR10:39732901 | kirrel3a         | 571887    | 10 | 39555113 | ENSDARG00000075806 | kin of IRRE like 3 a                                                               | NA            |
| DMR10:40062301 | CLMP             | NA        | 10 | 40031942 | ENSDARG00000003145 | CXADR-like membrane protein                                                        | Development   |
| DMR10:41094801 | antxr1b          | 556289    | 10 | 41052466 | ENSDARG00000074075 | anthrax toxin receptor 1b                                                          | Receptor      |
| DMR11:1219201  | atp2b2           | 557430    | 11 | 1122111  | ENSDARG00000063433 | ATPase - Ca++ transporting - plasma membrane 2                                     | Signaling     |
| DMR11:1321101  | iaars            | 334393    | 11 | 1311033  | ENSDARG00000007955 | isoleucyl-tRNA synthetase                                                          | Metabolism    |
| DMR11:1486301  | acot8            | 450052    | 11 | 1485983  | ENSDARG00000014138 | acyl-CoA thioesterase 8                                                            | Metabolism    |
| DMR11:1631001  | LRP1 (2 of 2)    | NA        | 11 | 1630547  | ENSDARG00000097827 | low density lipoprotein receptor-related protein 1                                 | Receptor      |
| DMR11:1689401  | LRP1 (2 of 2)    | NA        | 11 | 1630547  | ENSDARG00000097827 | low density lipoprotein receptor-related protein 1                                 | Receptor      |
| DMR11:1703701  | LRP1 (2 of 2)    | NA        | 11 | 1630547  | ENSDARG00000097827 | low density lipoprotein receptor-related protein 1                                 | Receptor      |
| DMR11:1746801  | LRP1 (2 of 2)    | NA        | 11 | 1630547  | ENSDARG00000097827 | low density lipoprotein receptor-related protein 1                                 | Receptor      |
| DMR11:1765501  | LRP1 (2 of 2)    | NA        | 11 | 1630547  | ENSDARG00000097827 | low density lipoprotein receptor-related protein 1                                 | Receptor      |
| DMR11:38487401 | epha8            | 570677    | 11 | 38449178 | ENSDARG00000023609 | eph receptor A8                                                                    | Receptor      |
| DMR12:1351201  | pent             | 393127    | 12 | 1287084  | ENSDARG00000103614 | phosphatidylethanolamine N-methyltransferase                                       | Metabolism    |
| DMR12:7709501  | ank3b            | 100126016 | 12 | 7612388  | ENSDARG00000077582 | ankyrin 3b                                                                         | Cytoskeleton  |
| DMR12:34960201 | 112285           | 561476    | 12 | 34950573 | ENSDARG00000053323 | 112285                                                                             | NA            |
| DMR13:2632001  | wdr11            | 558865    | 13 | 2599773  | ENSDARG00000075245 | WD repeat domain 11                                                                | NA            |
| DMR13:2665501  | wdr11            | 558865    | 13 | 2599773  | ENSDARG00000075245 | WD repeat domain 11                                                                | NA            |
| DMR13:10424801 | ch73-54n14.2     | NA        | 13 | 10362445 | ENSDARG00000091900 | ch73-54n14.2                                                                       | NA            |
| DMR13:10440101 | ch73-54n14.2     | NA        | 13 | 10362445 | ENSDARG00000091900 | ch73-54n14.2                                                                       | NA            |
| DMR13:12435901 | enpep            | 504088    | 13 | 12411159 | ENSDARG00000057064 | glutamyl aminopeptidase                                                            | Protease      |
| DMR13:12612301 | metap1           | 503783    | 13 | 12474346 | ENSDARG00000033440 | methionyl aminopeptidase 1                                                         | Protease      |
| DMR13:13109801 | fgfr3            | 58129     | 13 | 13085956 | ENSDARG00000004782 | fibroblast growth factor receptor 3                                                | Receptor      |
| DMR13:18077601 | tet1             | 101883702 | 13 | 18066195 | ENSDARG00000075230 | tet methylcytosine dioxygenase 1                                                   | Epigenetic    |
| DMR13:22908101 | supv3l1          | 570852    | 13 | 22907135 | ENSDARG00000077728 | suppressor of var1 - 3-like 1 (S. cerevisiae)                                      | NA            |
| DMR13:23021701 | sorbs1           | NA        | 13 | 23002216 | ENSDARG00000103435 | sorbin and SH3 domain containing 1                                                 | Cytoskeleton  |
| DMR13:23363001 | prim2            | 407653    | 13 | 23357832 | ENSDARG00000052721 | primase - DNA - polypeptide 2                                                      | Transcription |
| DMR13:24034601 | galnt2           | 570248    | 13 | 23938127 | ENSDARG00000003829 | UDP-N-acetyl-alpha-D-galactosamine:polypeptide N-acetylgalactosaminyltransferase 2 | Metabolism    |
| DMR13:26639501 | fancf            | 406255    | 13 | 26573447 | ENSDARG00000007885 | Fanconi anemia - complementation group L                                           | Protease      |
| DMR13:29142601 | MYOF (2 of 2)    | 559066    | 13 | 29108284 | ENSDARG00000017128 | myoferlin                                                                          | ECM           |
| DMR14:4045801  | dhrs13i1         | 402945    | 14 | 4044395  | ENSDARG00000098746 | dehydrogenase/reductase (SDR family) member 13 like 1                              | Metabolism    |
| DMR14:4352901  | GABRA4           | NA        | 14 | 4339747  | ENSDARG00000013389 | gamma-aminobutyric acid (GABA) A receptor - alpha 4                                | Receptor      |
| DMR14:6224301  | ch211-198i6.4    | NA        | 14 | 6222903  | ENSDARG00000105183 | ch211-198i6.4                                                                      | NA            |
| DMR14:6407001  | COL23A1 (2 of 2) | NA        | 14 | 6322136  | ENSDARG00000095339 | collagen - type XXIII - alpha 1                                                    | Cytoskeleton  |
| DMR14:8610101  | 153681           | 751719    | 14 | 8587515  | ENSDARG00000086017 | 153681                                                                             | NA            |
| DMR14:8613701  | 153681           | 751719    | 14 | 8587515  | ENSDARG00000086017 | 153681                                                                             | NA            |
| DMR14:47320801 | crybb1l1         | 553473    | 14 | 47316817 | ENSDARG00000007576 | crystallin - beta B1 - like 1                                                      | Development   |
| DMR15:14568101 | numbl            | 497616    | 15 | 14500202 | ENSDARG00000101949 | numb homolog (Drosophila)-like                                                     | Signaling     |
| DMR15:17327201 | dhx40            | 570225    | 15 | 17322221 | ENSDARG00000041586 | DEAH (Asp-Glu-Ala-His) box polypeptide 40                                          | Transcription |
| DMR15:18099401 | phldb1b          | 570275    | 15 | 18012375 | ENSDARG00000079378 | pleckstrin homology-like domain - family B - member 1b                             | NA            |
| DMR16:1359501  | cers2b           | 565295    | 16 | 1338362  | ENSDARG00000058992 | ceramide synthase 2b                                                               | Metabolism    |
| DMR16:37267901 | TSNARE1          | 101882035 | 16 | 37212994 | ENSDARG00000088650 | t-SNARE domain containing 1                                                        | NA            |
| DMR16:43445101 | F0704821.1       | 100151586 | 16 | 43445282 | ENSDARG00000104344 | Uncharacterized protein                                                            | NA            |
| DMR16:43445101 | ccdc127a         | 751722    | 16 | 43443996 | ENSDARG00000099190 | coiled-coil domain containing 127a                                                 | NA            |
| DMR16:44448301 | sult2st3         | 777792    | 16 | 44324431 | ENSDARG00000028367 | sulfotransferase family 2 - cytosolic sulfotransferase 3                           | Metabolism    |

|                |                 |           |    |          |                     |                                                                        |                 |
|----------------|-----------------|-----------|----|----------|---------------------|------------------------------------------------------------------------|-----------------|
| DMR16:54373001 | xrcc1           | 445480    | 16 | 54351049 | ENSDARG00000009494  | X-ray repair complementing defective repair in Chinese hamster cells 1 | DNA Repair      |
| DMR16:55305301 | CNDP1           | 619255    | 16 | 55296448 | ENSDARG00000069583  | carnosine dipeptidase 1 (metallopeptidase M20 family)                  | Protease        |
| DMR17:656101   | ch211-193k8.5   | NA        | 17 | 643986   | ENSDARG000000100894 | ch211-193k8.5                                                          | NA              |
| DMR17:656101   | dnajc17         | 393216    | 17 | 626928   | ENSDARG000000104959 | DnaJ (Hsp40) homolog - subfamily C - member 17                         | Protein Binding |
| DMR17:730801   | dnajc17         | 393216    | 17 | 626928   | ENSDARG000000104959 | DnaJ (Hsp40) homolog - subfamily C - member 17                         | Protein Binding |
| DMR17:1552001  | NA              | NA        | 17 | 1527965  | ENSDARG00000014717  | NA                                                                     | NA              |
| DMR17:4691101  | KLHL29 (1 of 2) | 100334314 | 17 | 4421283  | ENSDARG000000043799 | kelch-like family member 29                                            | NA              |
| DMR17:7873501  | syne1b          | NA        | 17 | 7687722  | ENSDARG00000063068  | spectrin repeat containing - nuclear envelope 1b                       | Epigenetic      |
| DMR17:8203801  | cdc42bpaa       | NA        | 17 | 8166170  | ENSDARG000000104283 | CDC42 binding protein kinase alpha (DMPK-like) a                       | Signaling       |
| DMR17:8778001  | psmc1a          | 336786    | 17 | 8741836  | ENSDARG00000030537  | proteasome (prosome - macropain) 26S subunit - ATPase - 1a             | Protease        |
| DMR17:14505201 | daam1a          | 557451    | 17 | 14459424 | ENSDARG00000015059  | dishevelled associated activator of morphogenesis 1a                   | Development     |
| DMR17:14772501 | ch211-266o15.1  | 560900    | 17 | 14723371 | ENSDARG00000057681  | ch211-266o15.1                                                         | NA              |
| DMR17:51757501 | numb            | 692064    | 17 | 51732871 | ENSDARG00000027279  | numb homolog (Drosophila)                                              | Signaling       |
| DMR17:52816001 | meis2a          | 170454    | 17 | 52736268 | ENSDARG00000098240  | Meis homeobox 2a                                                       | Transcription   |
| DMR17:52867901 | C17H15orf41     | NA        | 17 | 52854307 | ENSDARG00000070461  | chromosome 15 open reading frame 41                                    | NA              |
| DMR17:52913101 | C17H15orf41     | NA        | 17 | 52854307 | ENSDARG00000070461  | chromosome 15 open reading frame 41                                    | NA              |
| DMR18:2941701  | clns1a          | 30699     | 18 | 2941658  | ENSDARG000000103027 | chloride channel - nucleotide-sensitive - 1A                           | Transport       |
| DMR18:2971401  | rsf1a           | NA        | 18 | 2967706  | ENSDARG000000102589 | remodeling and spacing factor 1a                                       | Binding Protein |
| DMR18:3276701  | pak1            | 373103    | 18 | 3268382  | ENSDARG000000103959 | p21 protein (Cdc42/Rac)-activated kinase 1                             | Signaling       |
| DMR18:3456301  | elf2a           | 573991    | 18 | 3455556  | ENSDARG000000101061 | eukaryotic translation initiation factor 2A                            | Translation     |
| DMR18:11004901 | ch211-59c24.1   | 567512    | 18 | 10998743 | ENSDARG00000042189  | ch211-59c24.1                                                          | NA              |
| DMR18:39019801 | myo5aa          | 562188    | 18 | 38918910 | ENSDARG00000061635  | myosin Vaa                                                             | Cytoskeleton    |
| DMR18:48920001 | ppp1r37         | 562516    | 18 | 48869580 | ENSDARG00000078458  | protein phosphatase 1 - regulatory subunit 37                          | Signaling       |
| DMR18:50799701 | ddb1            | NA        | 18 | 50803251 | ENSDARG00000074431  | damage-specific DNA binding protein 1                                  | DNA Repair      |
| DMR19:23601    | gpd1c           | 406615    | 19 | 24933    | ENSDARG00000036942  | glycerol-3-phosphate dehydrogenase 1c                                  | Metabolism      |
| DMR19:35537801 | macf1a          | 562190    | 19 | 35452782 | ENSDARG00000028533  | microtubule-actin crosslinking factor 1a                               | Cytoskeleton    |
| DMR19:48419401 | psmd3           | 393544    | 19 | 48388925 | ENSDARG00000018124  | proteasome (prosome - macropain) 26S subunit - non-ATPase - 3          | Protease        |
| DMR19:48419401 | btr30           | 393394    | 19 | 48322065 | ENSDARG000000102591 | bloodthirsty-related gene family - member 30                           | NA              |
| DMR19:48419401 | btr30           | 103909280 | 19 | 48322065 | ENSDARG000000102591 | bloodthirsty-related gene family - member 30                           | NA              |
| DMR20:3615101  | CABZ01071723.1  | NA        | 20 | 3418897  | ENSDARG00000017795  | Uncharacterized protein                                                | NA              |
| DMR20:4992601  | arid1b          | 569589    | 20 | 4855142  | ENSDARG00000092503  | AT rich interactive domain 1B (SWI1-like)                              | Epigenetic      |
| DMR20:5558801  | nrxn3b          | 570698    | 20 | 5518645  | ENSDARG00000062693  | neurexin 3b                                                            | Receptor        |
| DMR20:9384301  | BEGAIN          | 563117    | 20 | 9367910  | ENSDARG00000043673  | brain-enriched guanylate kinase-associated                             | Signaling       |
| DMR20:25707301 | cyp2j20         | 797309    | 20 | 25698437 | ENSDARG00000094057  | cytochrome P450 - family 2 - subfamily J - polypeptide 20              | Metabolism      |
| DMR20:28546801 | dpp3            | 562738    | 20 | 28531696 | ENSDARG00000025309  | D4 - zinc and double PHD fingers - family 3                            | Transcription   |
| DMR20:30709801 | ccr6a           | 558616    | 20 | 30707668 | ENSDARG00000087474  | chemokine (C-C motif) receptor 6a                                      | Receptor        |
| DMR20:32207101 | grm1a           | 555576    | 20 | 32144506 | ENSDARG00000026796  | glutamate receptor - metabotropic 1a                                   | Receptor        |
| DMR20:33274101 | ddx1            | 556790    | 20 | 33272289 | ENSDARG00000032117  | DEAD (Asp-Glu-Ala-Asp) box helicase 1                                  | Translation     |
| DMR21:1920301  | WDR7            | NA        | 21 | 1904090  | ENSDARG000000100274 | WD repeat domain 7                                                     | NA              |
| DMR21:3157401  | CTIF            | 100537309 | 21 | 3090902  | ENSDARG00000090617  | CBP80/20-dependent translation initiation factor                       | Translation     |
| DMR21:20216801 | dkey-247m21.3   | 559089    | 21 | 20193366 | ENSDARG00000001906  | dkey-247m21.3                                                          | NA              |
| DMR21:27805601 | nrxn2a          | 558326    | 21 | 27599593 | ENSDARG00000061454  | neurexin 2a                                                            | NA              |
| DMR21:29267701 | BX537120.1      | 559695    | 21 | 29258056 | ENSDARG00000098587  | NA                                                                     | NA              |
| DMR21:29368001 | 171310          | 100124620 | 21 | 29326179 | ENSDARG00000099580  | 171310                                                                 | NA              |
| DMR21:29368001 | BX537120.1      | 559695    | 21 | 29258056 | ENSDARG00000098587  | NA                                                                     | NA              |
| DMR21:34921401 | lipia           | 445105    | 21 | 34910543 | ENSDARG00000007108  | lipase - member 1a                                                     | Metabolism      |
| DMR21:35219601 | ubtd2           | 436991    | 21 | 35181320 | ENSDARG00000069184  | ubiquitin domain containing 2                                          | Protease        |
| DMR21:35403401 | dkeyp-23e4.3    | 566257    | 21 | 35347886 | ENSDARG00000074819  | dkeyp-23e4.3                                                           | NA              |
| DMR21:35457401 | dkeyp-23e4.3    | 566257    | 21 | 35347886 | ENSDARG00000074819  | dkeyp-23e4.3                                                           | NA              |
| DMR21:35759501 | sgcd            | 324961    | 21 | 35617273 | ENSDARG00000098573  | sarcoglycan - delta (dystrophin-associated glycoprotein)               | Cytoskeleton    |
| DMR21:36469801 | gabrb4          | 566514    | 21 | 36393096 | ENSDARG00000099096  | gamma-aminobutyric acid (GABA) A receptor - beta 4                     | Receptor        |
| DMR21:44327201 | gabra3          | NA        | 21 | 44306279 | ENSDARG00000090883  | gamma-aminobutyric acid (GABA) A receptor - alpha 3                    | Receptor        |
| DMR22:52901    | mrpl20          | 751640    | 22 | 19300    | ENSDARG00000090462  | mitochondrial ribosomal protein L20                                    | Translation     |
| DMR22:4466901  | ch73-256j6.7    | NA        | 22 | 4435183  | ENSDARG00000092336  | ch73-256j6.7                                                           | NA              |
| DMR22:4466901  | ch73-256j6.5    | NA        | 22 | 4426983  | ENSDARG00000078519  | ch73-256j6.5                                                           | NA              |
| DMR22:4470201  | ch73-256j6.7    | NA        | 22 | 4435183  | ENSDARG00000092336  | ch73-256j6.7                                                           | NA              |
| DMR22:4470201  | ch73-256j6.5    | NA        | 22 | 4426983  | ENSDARG00000078519  | ch73-256j6.5                                                           | NA              |
| DMR22:9624901  | RNH1 (12 of 55) | 569265    | 22 | 9605488  | ENSDARG00000093402  | ribonuclease/angiogenin inhibitor 1                                    | NA              |
| DMR22:16239001 | cdc14ab         | 565969    | 22 | 16165001 | ENSDARG00000057016  | cell division cycle 14Ab                                               | Cell Cycle      |
| DMR22:20722801 | amh             | 493624    | 22 | 20722204 | ENSDARG00000014357  | anti-Mullerian hormone                                                 | Hormone         |
| DMR22:26599401 | capn8           | 337730    | 22 | 26380642 | ENSDARG00000055715  | calpain 8                                                              | Protease        |
| DMR22:26599401 | capn8           | 103909603 | 22 | 26380642 | ENSDARG00000055715  | calpain 8                                                              | Protease        |
| DMR22:26599401 | capn2l          | 445091    | 22 | 26423303 | ENSDARG00000034211  | calpain 2 - (m/II) large subunit - like                                | Protease        |
| DMR22:26599401 | capn2l          | 550505    | 22 | 26423303 | ENSDARG00000034211  | calpain 2 - (m/II) large subunit - like                                | Protease        |
| DMR22:26625901 | capn2l          | 445091    | 22 | 26423303 | ENSDARG00000034211  | calpain 2 - (m/II) large subunit - like                                | Protease        |
| DMR22:26625901 | capn2l          | 550505    | 22 | 26423303 | ENSDARG00000034211  | calpain 2 - (m/II) large subunit - like                                | Protease        |
| DMR22:29724401 | pdcd4b          | 321061    | 22 | 29709788 | ENSDARG00000041022  | programmed cell death 4b                                               | Apoptosis       |
| DMR22:30129001 | add3a           | 556762    | 22 | 30098050 | ENSDARG00000040874  | adducin 3 (gamma) a                                                    | Cytoskeleton    |
| DMR22:30136601 | add3a           | 556762    | 22 | 30098050 | ENSDARG00000040874  | adducin 3 (gamma) a                                                    | Cytoskeleton    |
| DMR22:34908801 | slit1b          | 561685    | 22 | 34867222 | ENSDARG00000099446  | slit homolog 1b (Drosophila)                                           | Development     |
| DMR22:37451201 | ch73-334e23.1   | NA        | 22 | 37412522 | ENSDARG00000095844  | ch73-334e23.1                                                          | NA              |
| DMR22:37456701 | ch73-334e23.1   | NA        | 22 | 37412522 | ENSDARG00000095844  | ch73-334e23.1                                                          | NA              |
| DMR23:44152601 | CORIN           | 100320926 | 23 | 44137901 | ENSDARG000000101281 | corin - serine peptidase                                               | Protease        |
| DMR23:45582101 | PSIP1 (1 of 2)  | 402866    | 23 | 45487012 | ENSDARG00000077405  | PC4 and SFRS1 interacting protein 1                                    | NA              |
| DMR23:45582101 | PSIP1 (1 of 2)  | 407619    | 23 | 45487012 | ENSDARG00000077405  | PC4 and SFRS1 interacting protein 1                                    | NA              |
| DMR24:834001   | nappa           | 541355    | 24 | 742695   | ENSDARG00000006617  | N-ethylmaleimide-sensitive factor attachment protein - gamma a         | Metabolism      |
| DMR24:24876301 | nupl1           | 406510    | 24 | 24863033 | ENSDARG00000033965  | nucleoporin like 1                                                     | Nuclear Matrix  |
| DMR24:27134701 | dip2ca          | 563890    | 24 | 26944115 | ENSDARG00000062154  | DIP2 disco-interacting protein 2 homolog Ca (Drosophila)               | Development     |
| DMR25:6345401  | snx33           | 100001421 | 25 | 6323636  | ENSDARG00000014954  | sorting nexin 33                                                       | Signaling       |
| DMR25:35284401 | cpne8           | 100332028 | 25 | 35269605 | ENSDARG00000025189  | copine VIII                                                            | NA              |
| DMR25:36468801 | wwox            | NA        | 25 | 36389835 | ENSDARG00000007614  | WW domain containing oxidoreductase                                    | Metabolism      |
| DMR25:36680301 | rfd3            | 100329327 | 25 | 36679404 | ENSDARG00000087752  | ring finger and WD repeat domain 3                                     | Signaling       |
